# Supplementary material for: Whole-body cellular mapping in mouse using standard IgG antibodies
Source: PubMed Central journal article supplement (PMC11021200; doi:10.1038/s41587-023-01846-0), 2023-07-10
Supplement: 41587_2023_1846_MOESM1_ESM.pdf [file 41587_2023_1846_MOESM1_ESM.pdf]

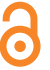

---

# Whole-body cellular mapping in mouse using standard IgG antibodies

---

In the format provided by the authors and unedited



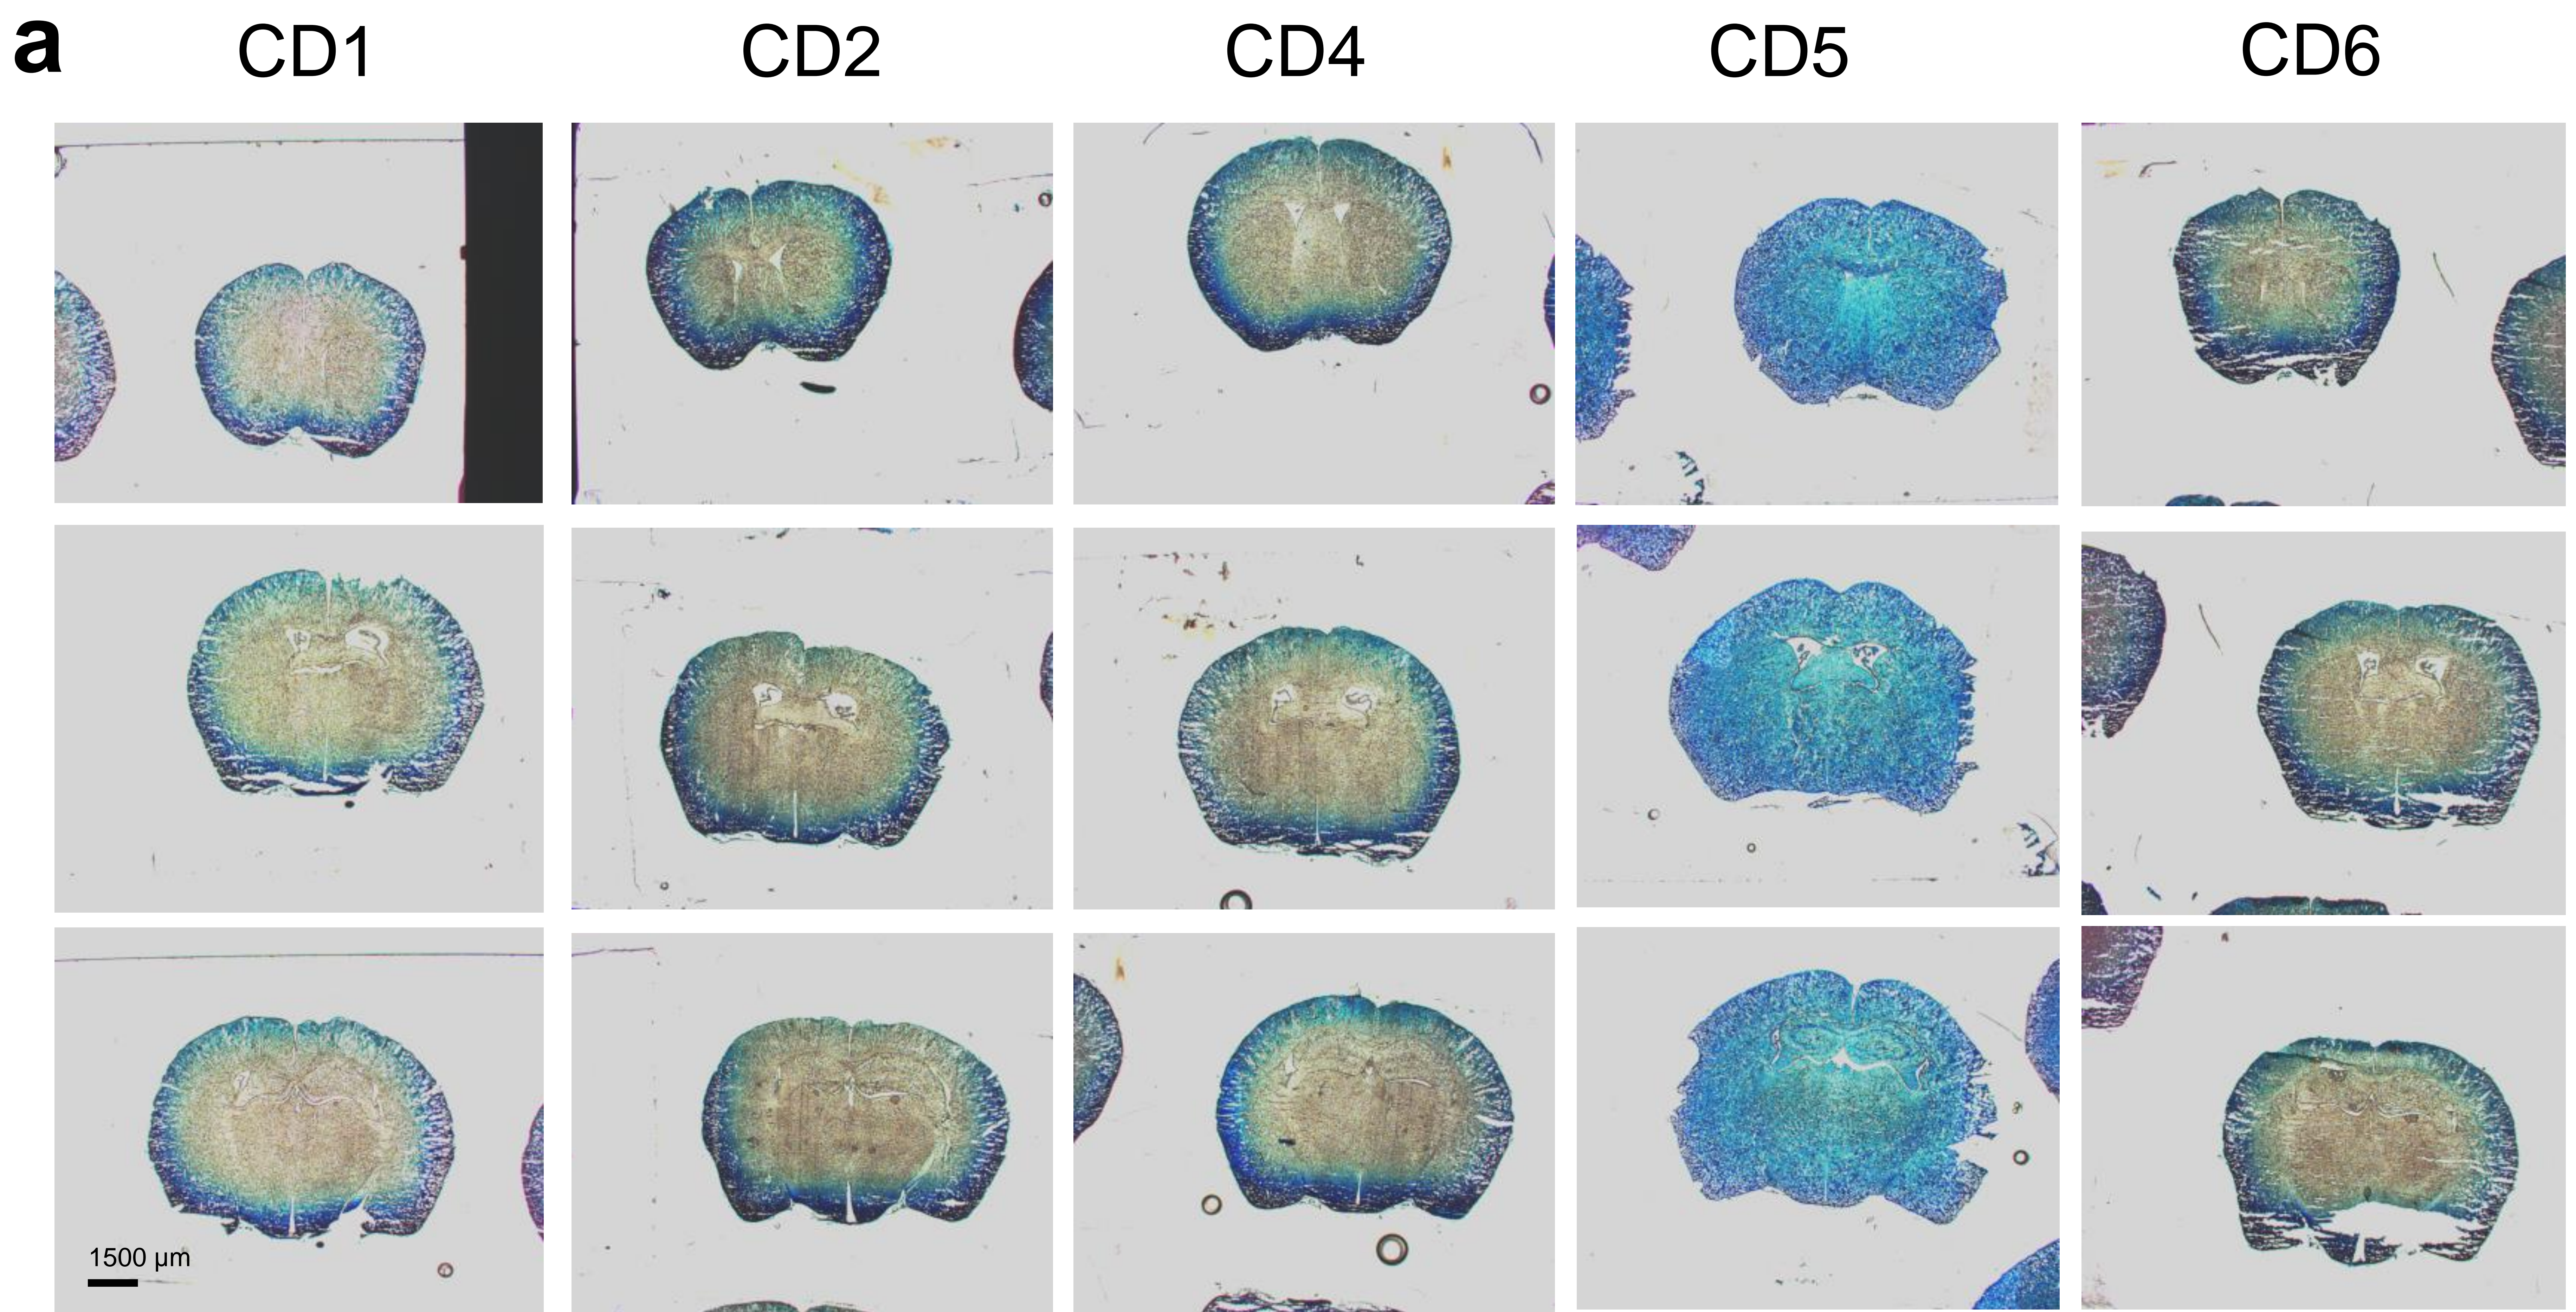

**b** Quantification of Methyl Blue staining of mouse brain sections

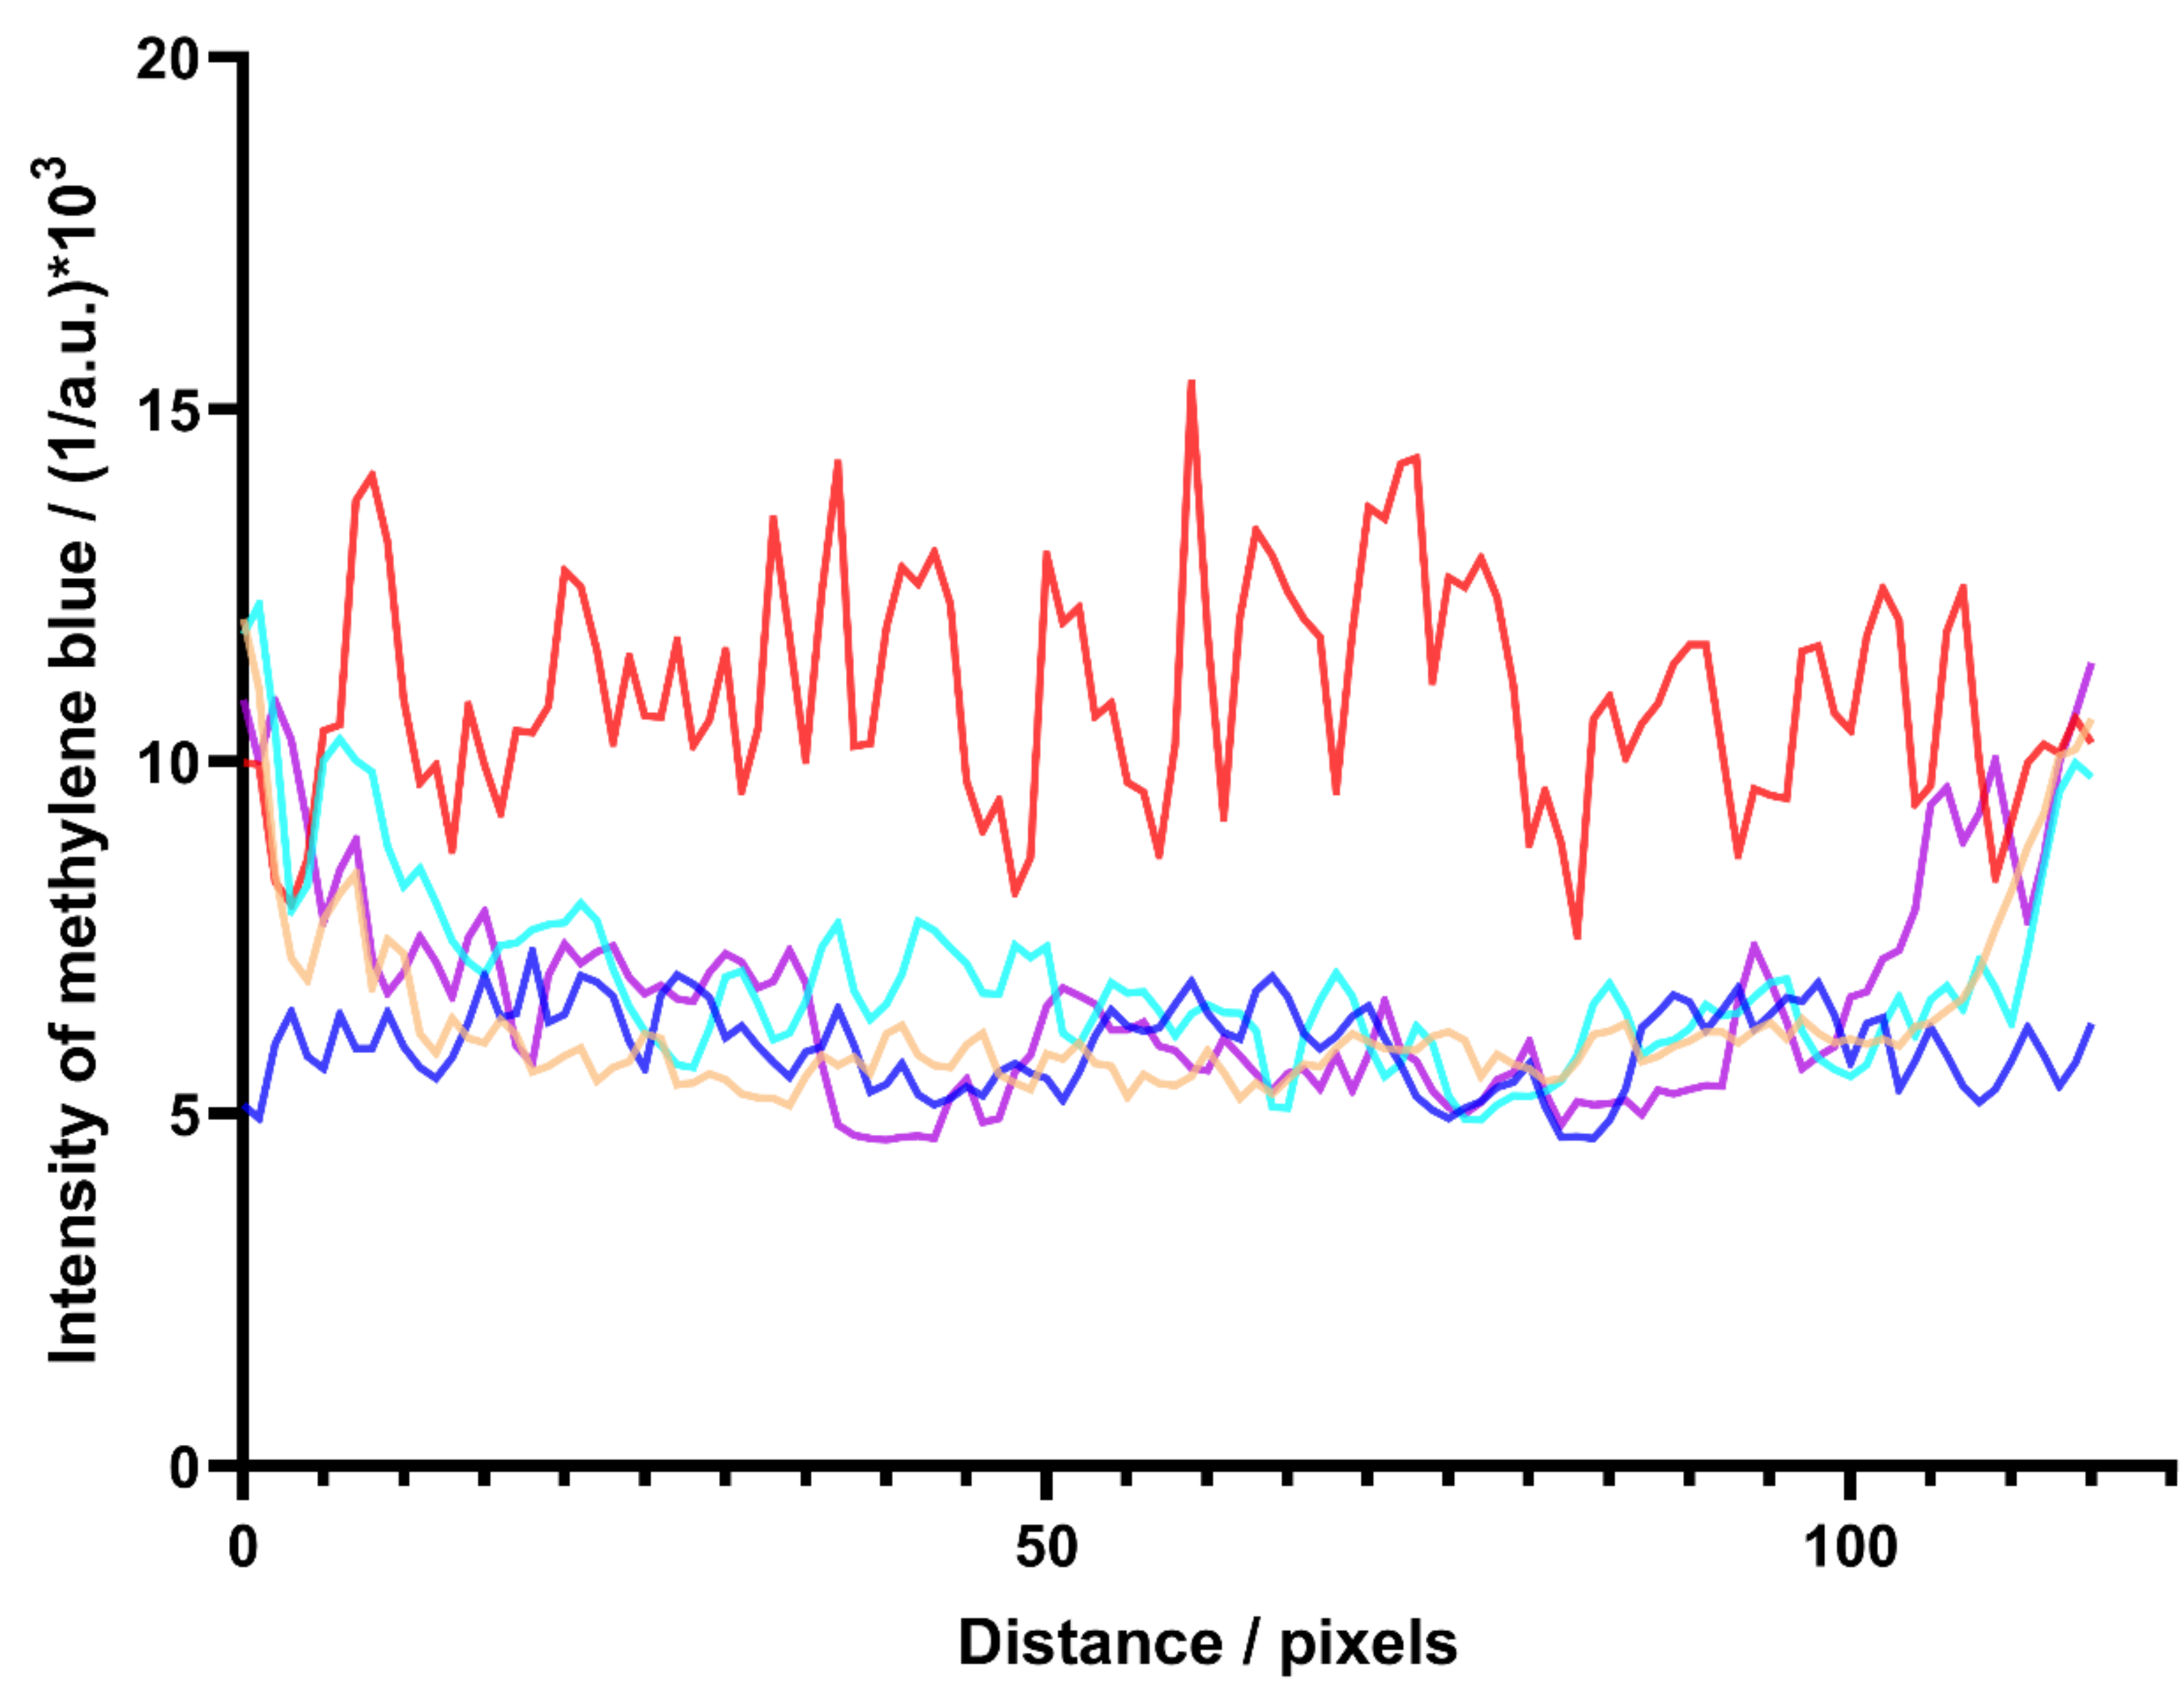

**c** Quantification of Methyl Blue staining of mouse brain tissue

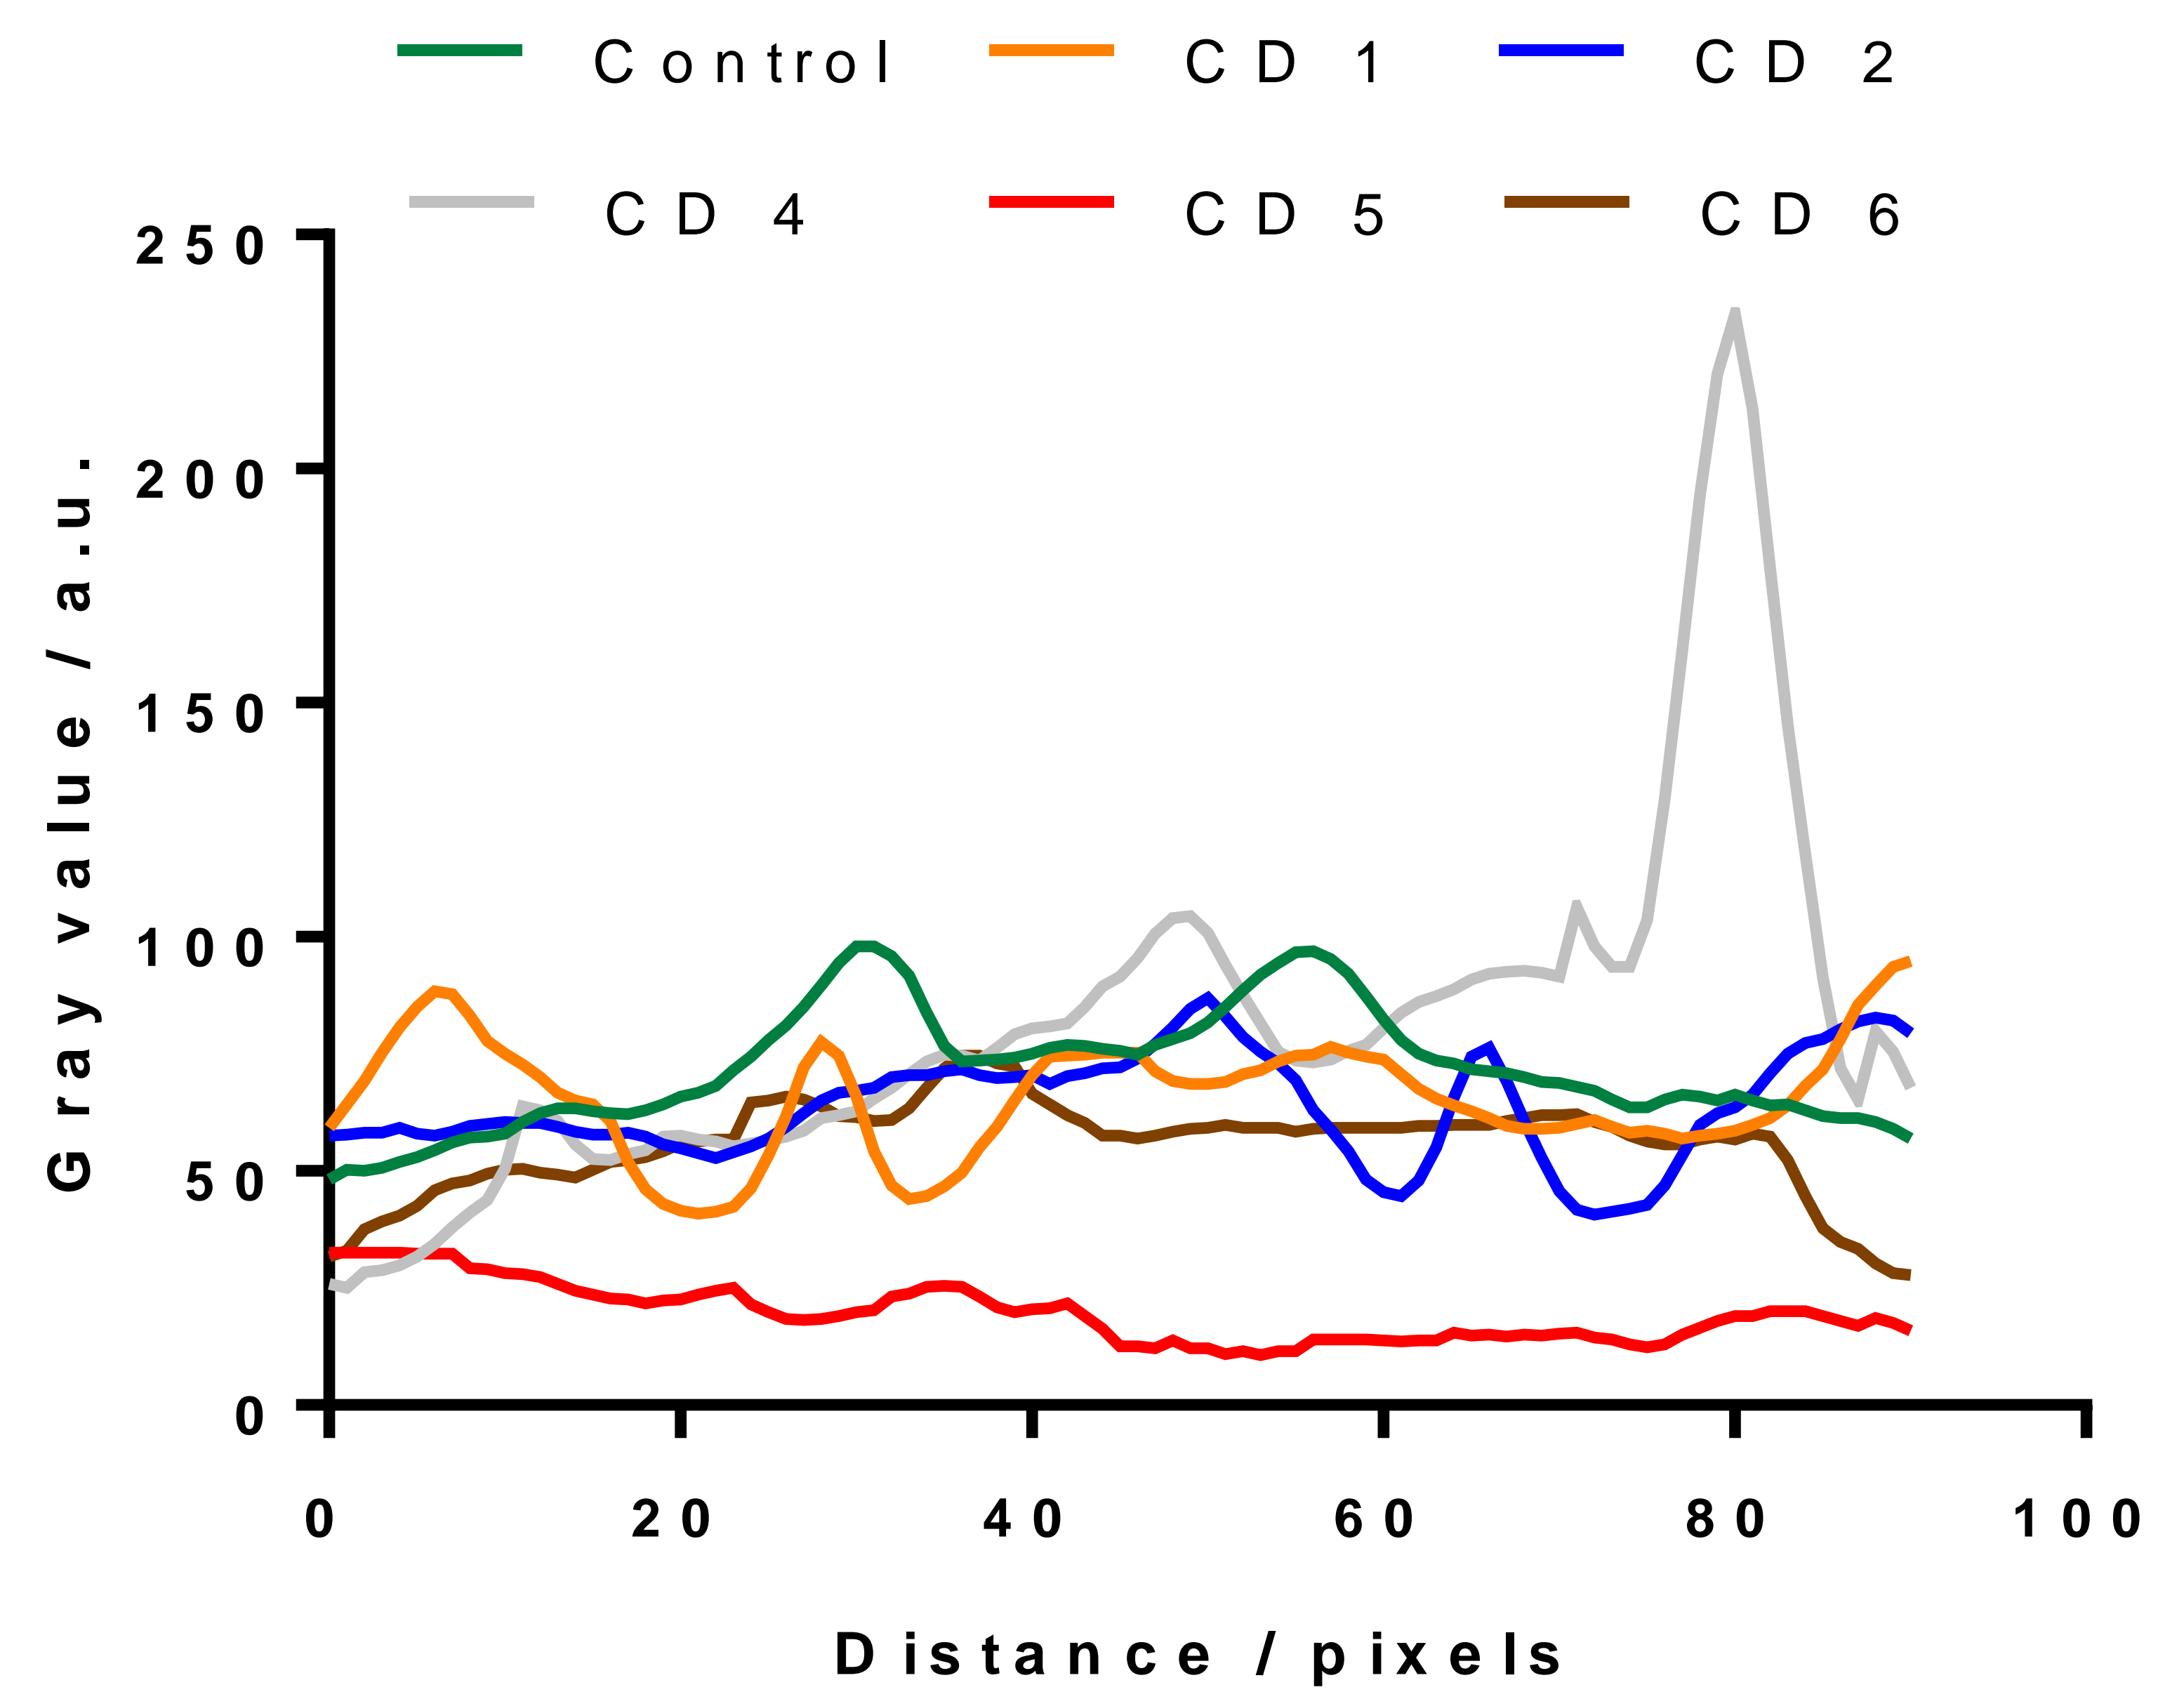

## Supplementary Figure 1

### Screening the cyclodextrins with Methyl Blue staining to mouse brain section

(a) Methylene blue staining of individual hemispheres of mouse brains after permeabilization with different CD-containing solutions and imaging on different brain frozen sections. CD5 is shown to strongly enhance tissue permeabilization compared to others.  $n=4$ . (b) Profile plot along each frozen section of mouse brains in Figure S1a. (c) Profile plot along each mouse brain dimension in Fig. 1c.



# wildDISCO pipeline

## ① Blood removal and fixation

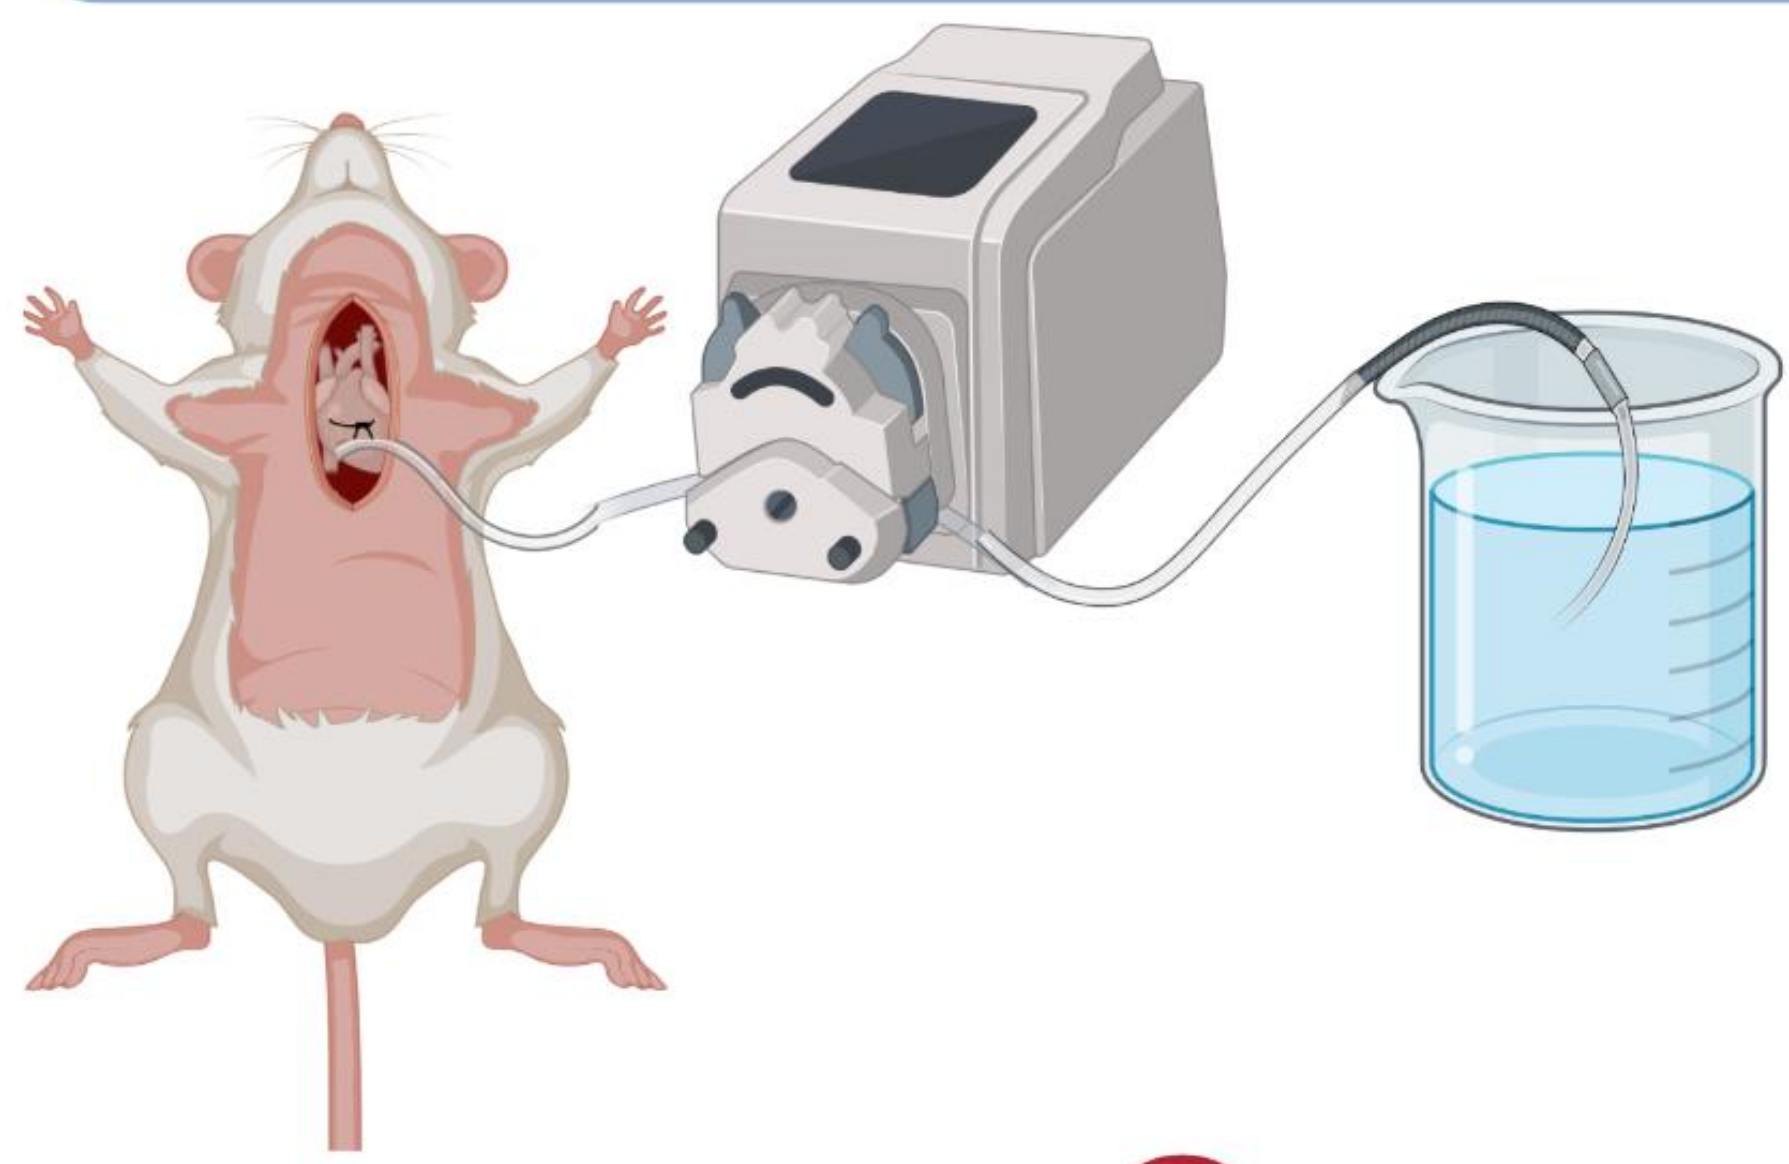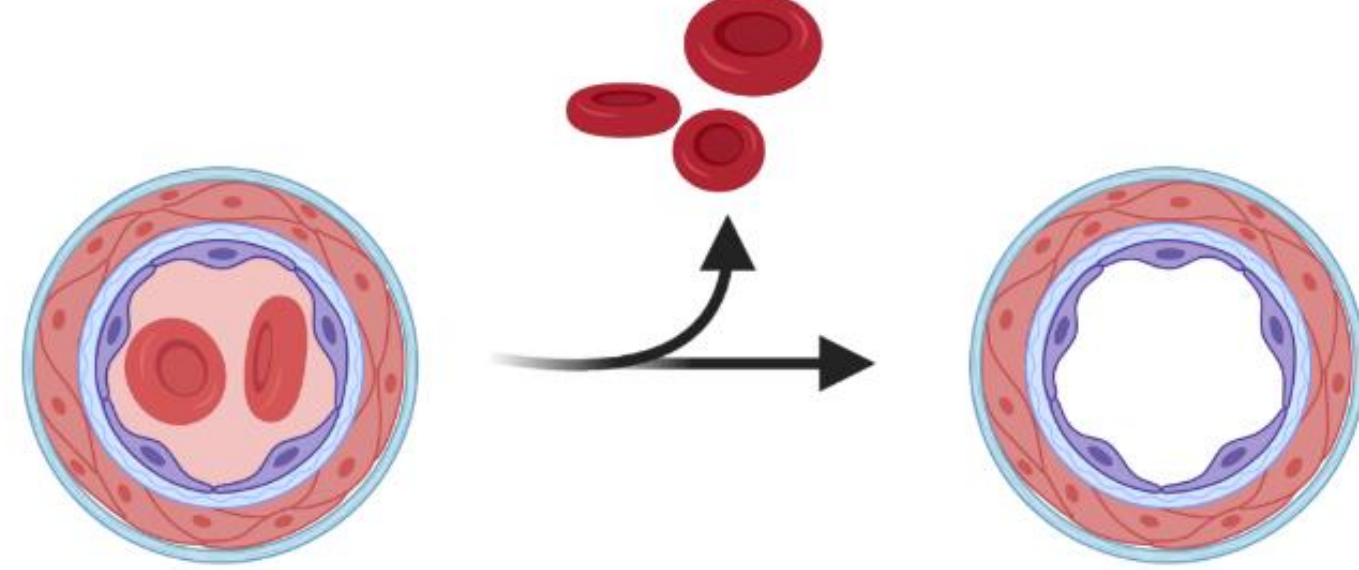

PBS/Heparin perfusion, 5 minutes  
PFA perfusion, 5 minutes  
PFA passive fixation, 6 hours

## ② Skin removal

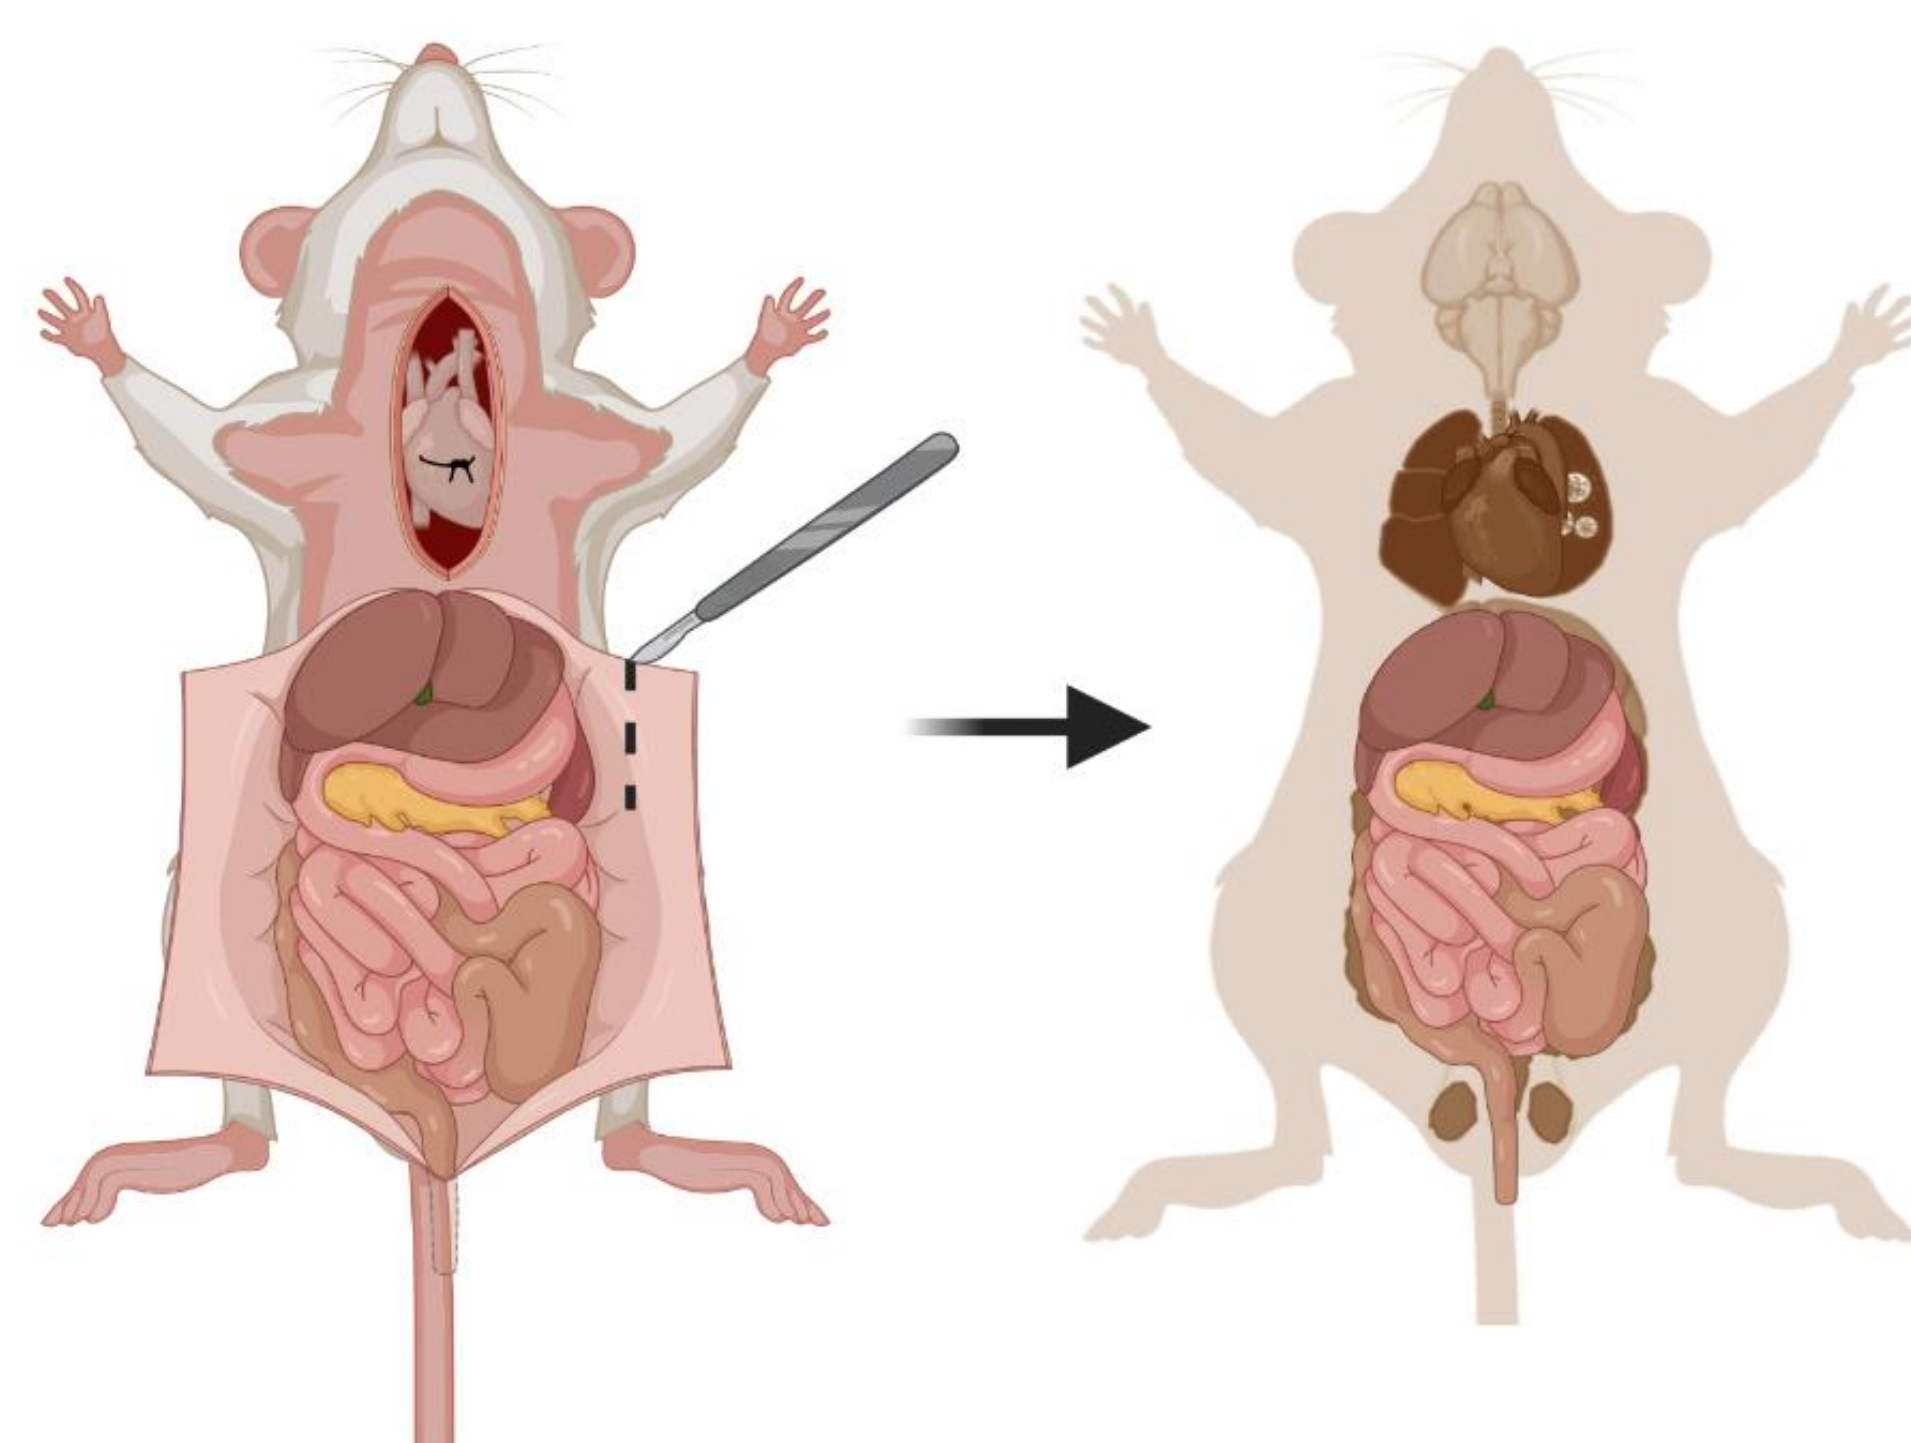

## ③ Active pumping immunostaining

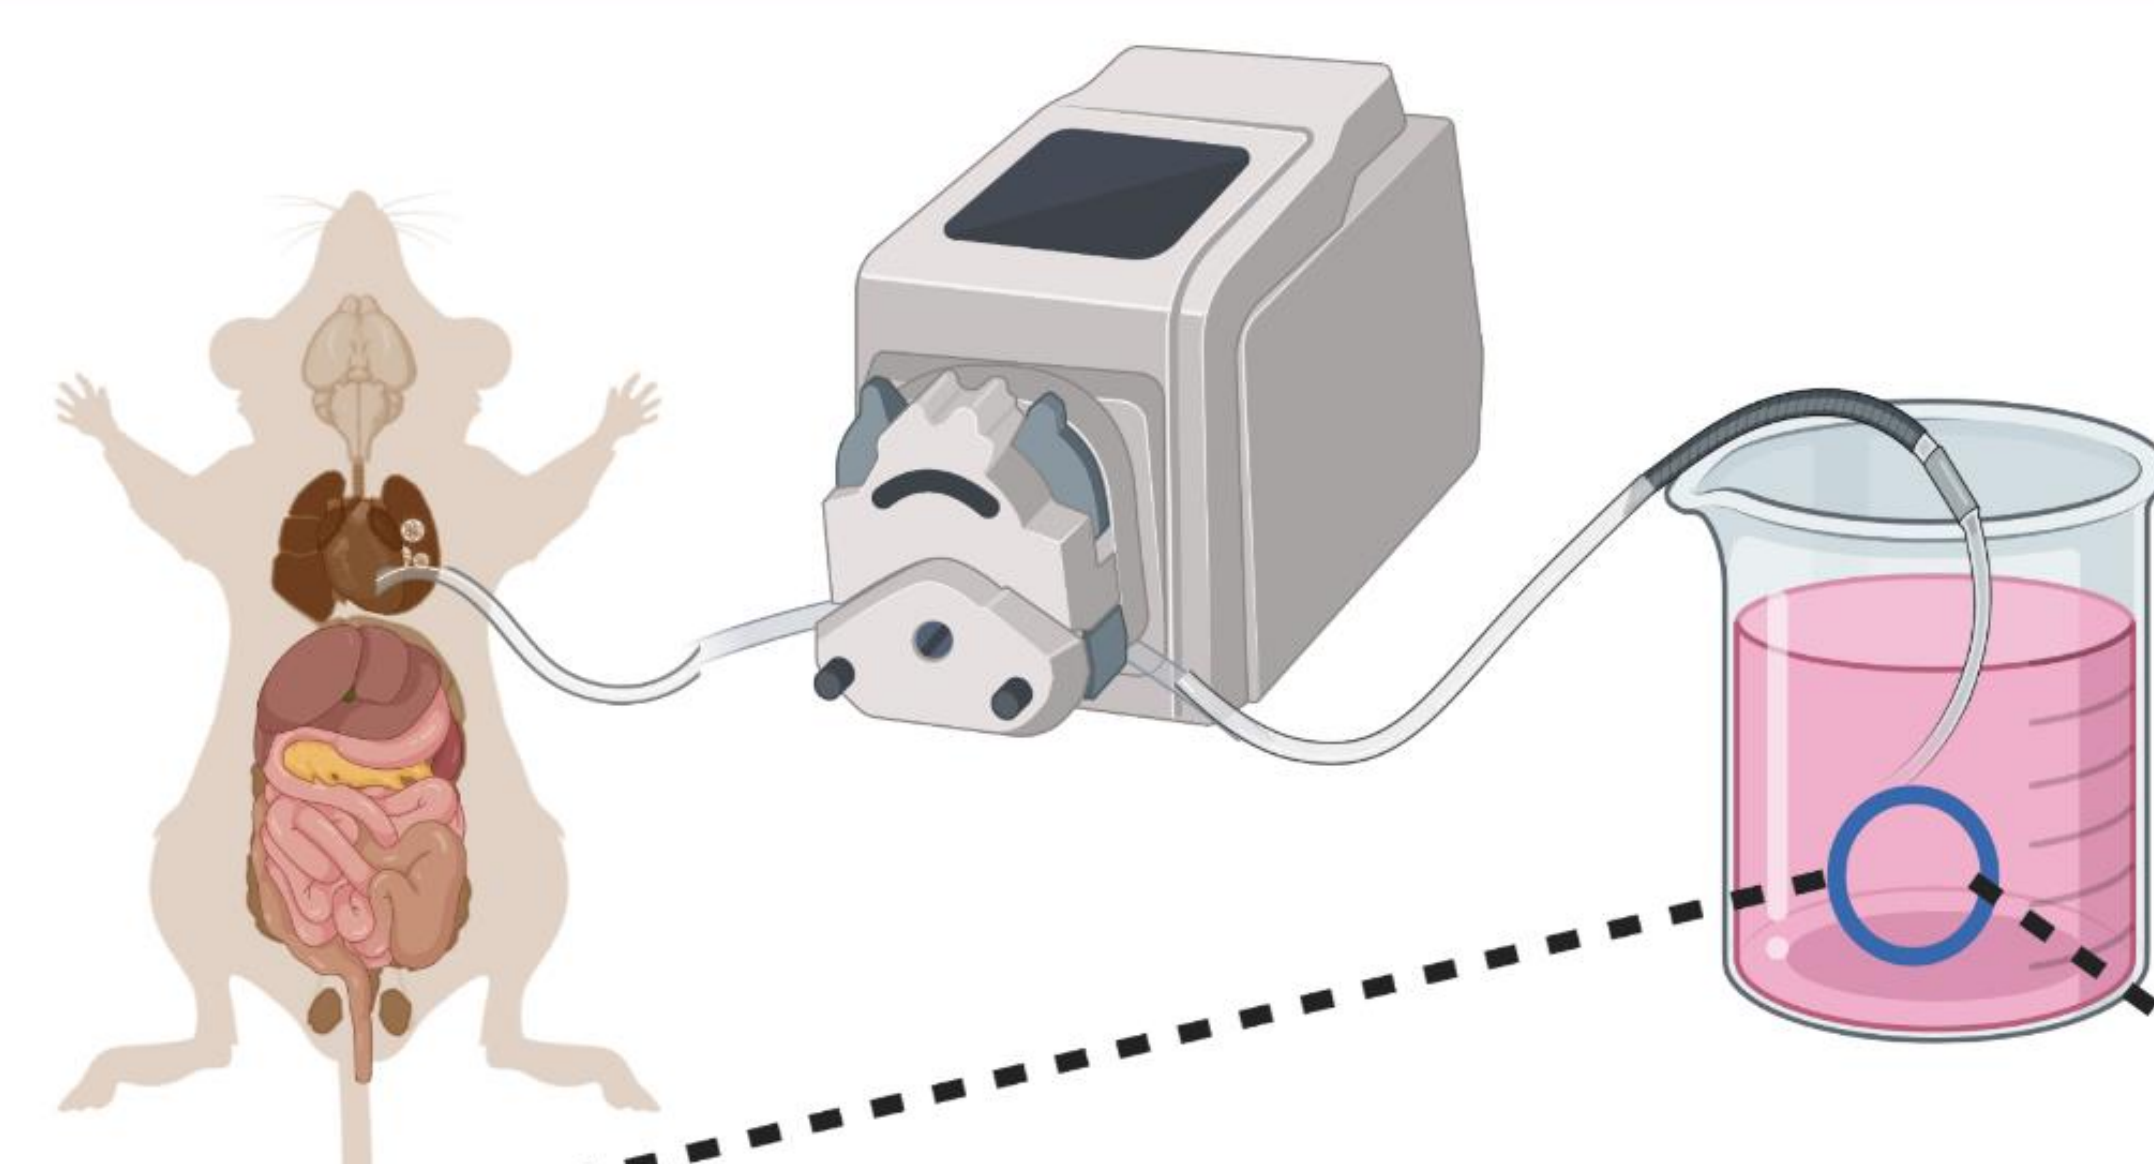

Decalcification  
(24 hours)  
EDTA

Blocking Buffer  
(24 hours)  
Goat Serum  
Triton

Immunostaining Buffer  
(7 days)  
Goat Serum DMSO  
Triton CHAPS  
Glycine CD 5  
Abs

## ④ Tissue clearing

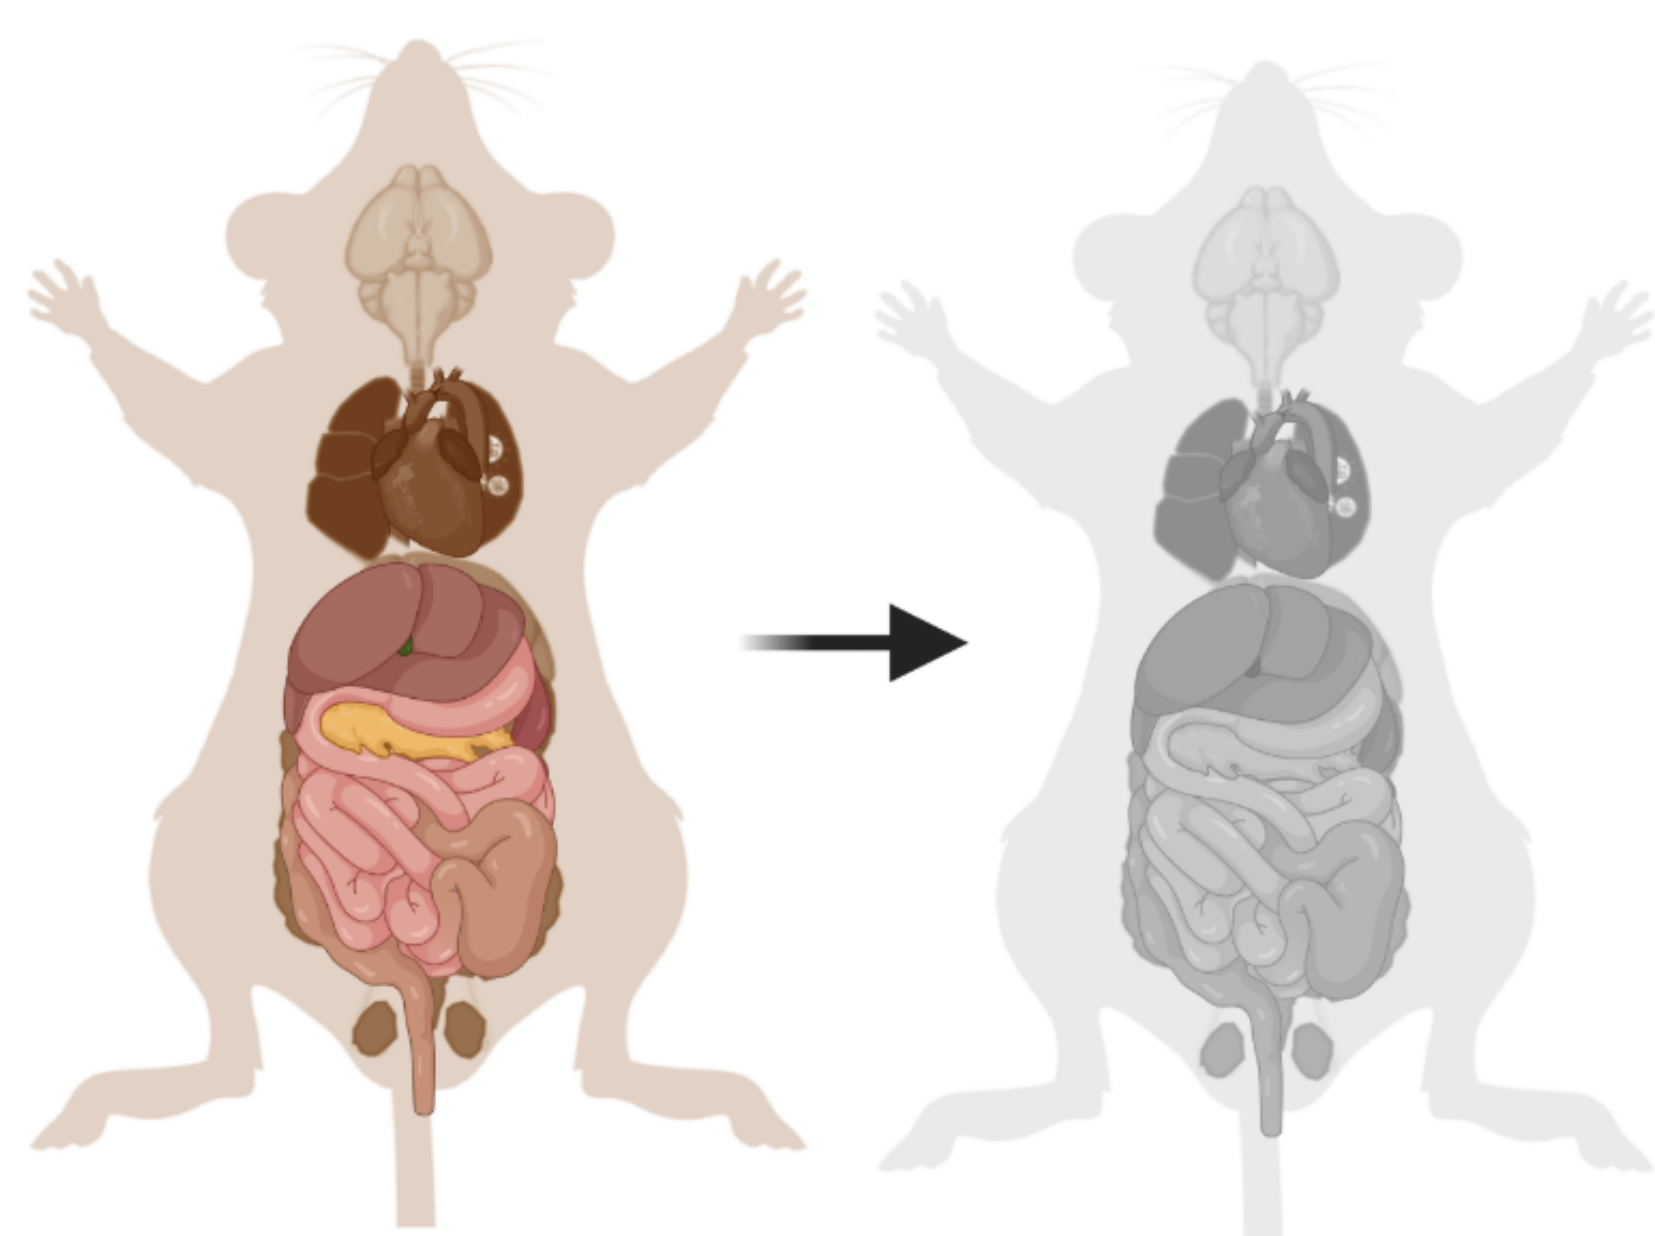

Dehydrate with THF (50%, 70%, 90%, 100%,  
100%), each step 12 hours  
Delipidate with DCM, each step 12 hours  
RI matching with BABB, until transparent

## ⑤ Imaging

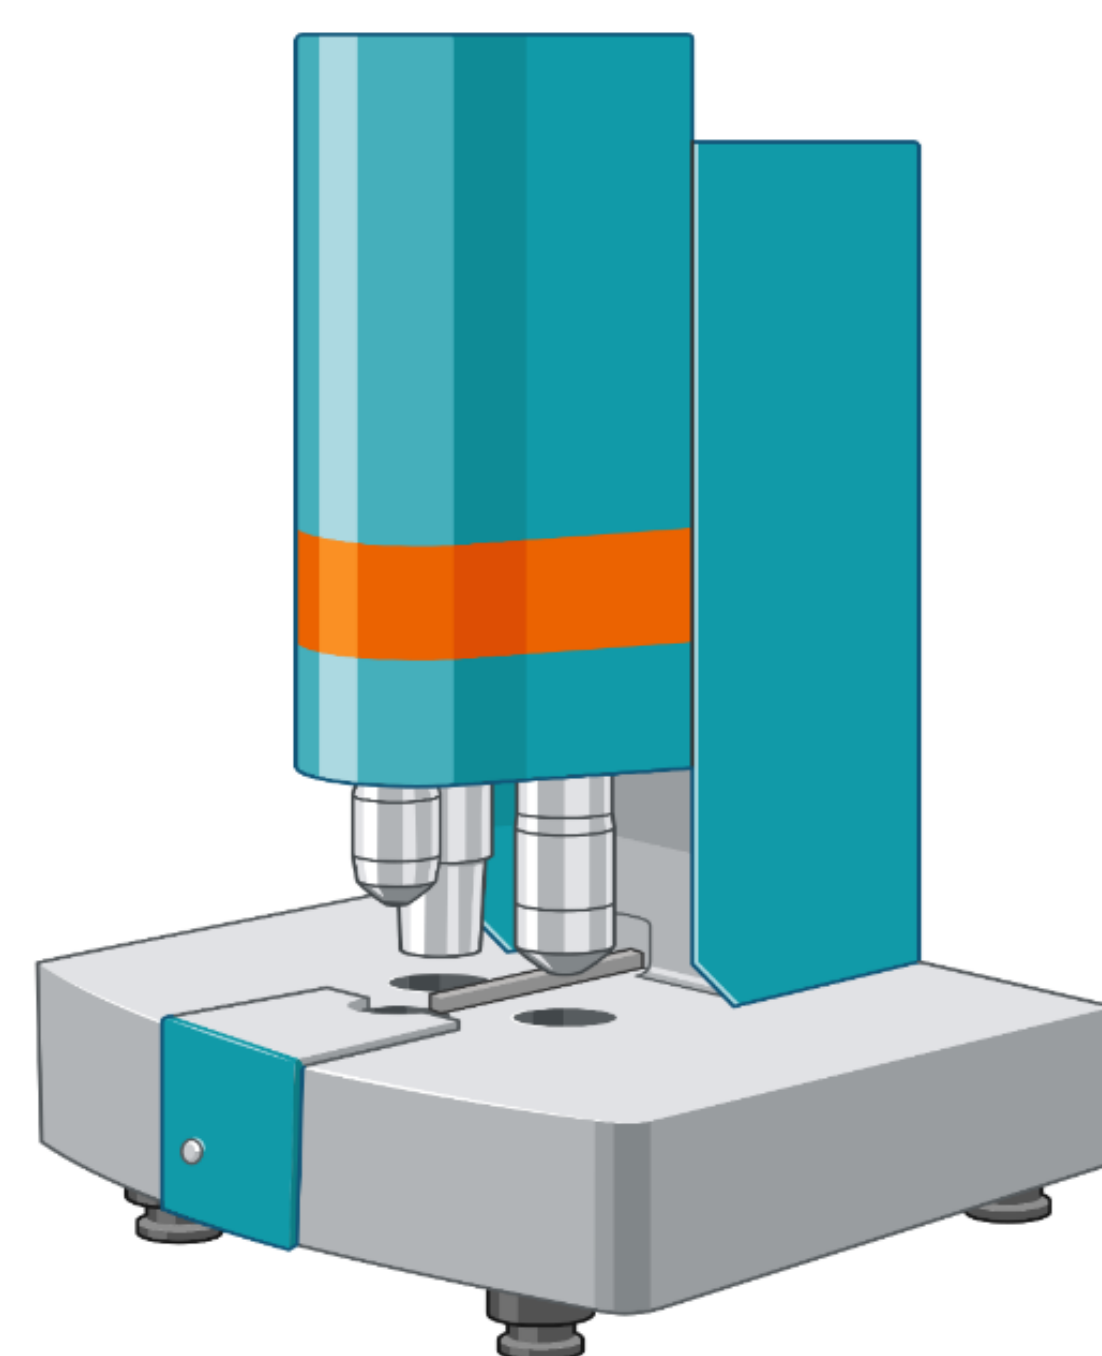

Light-sheet fluorescence microscopy

## ⑥ Data analysis

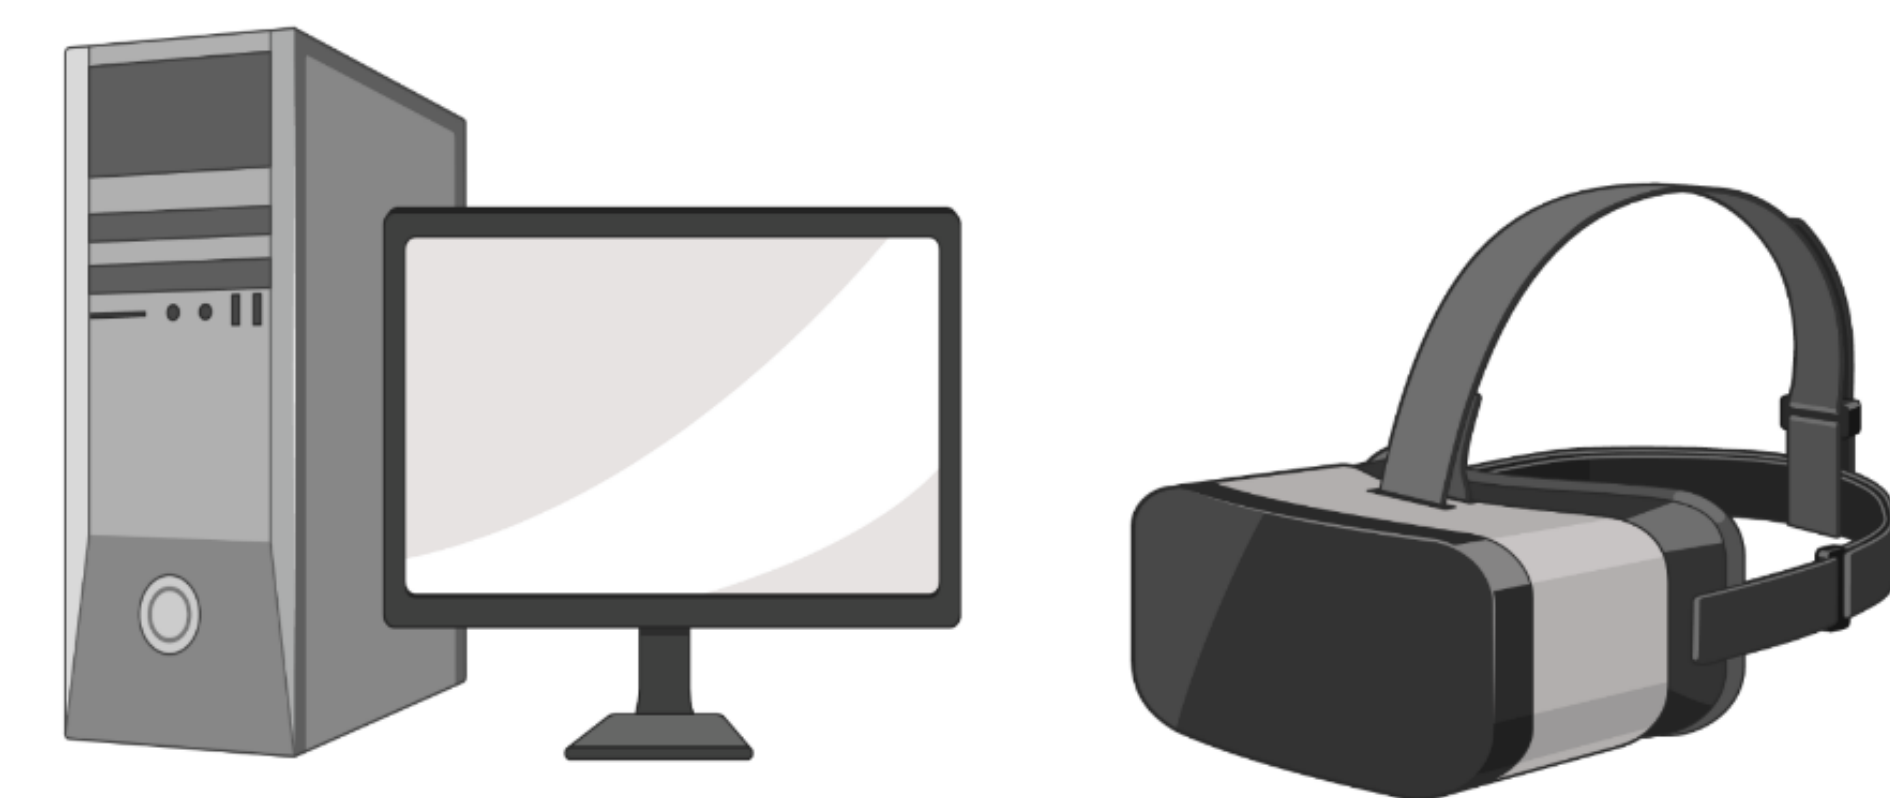

VR glass

**Supplementary Figure 2**  
**Overview of wildDISCO pipeline**  
Schematic of wildDISCO pipeline.



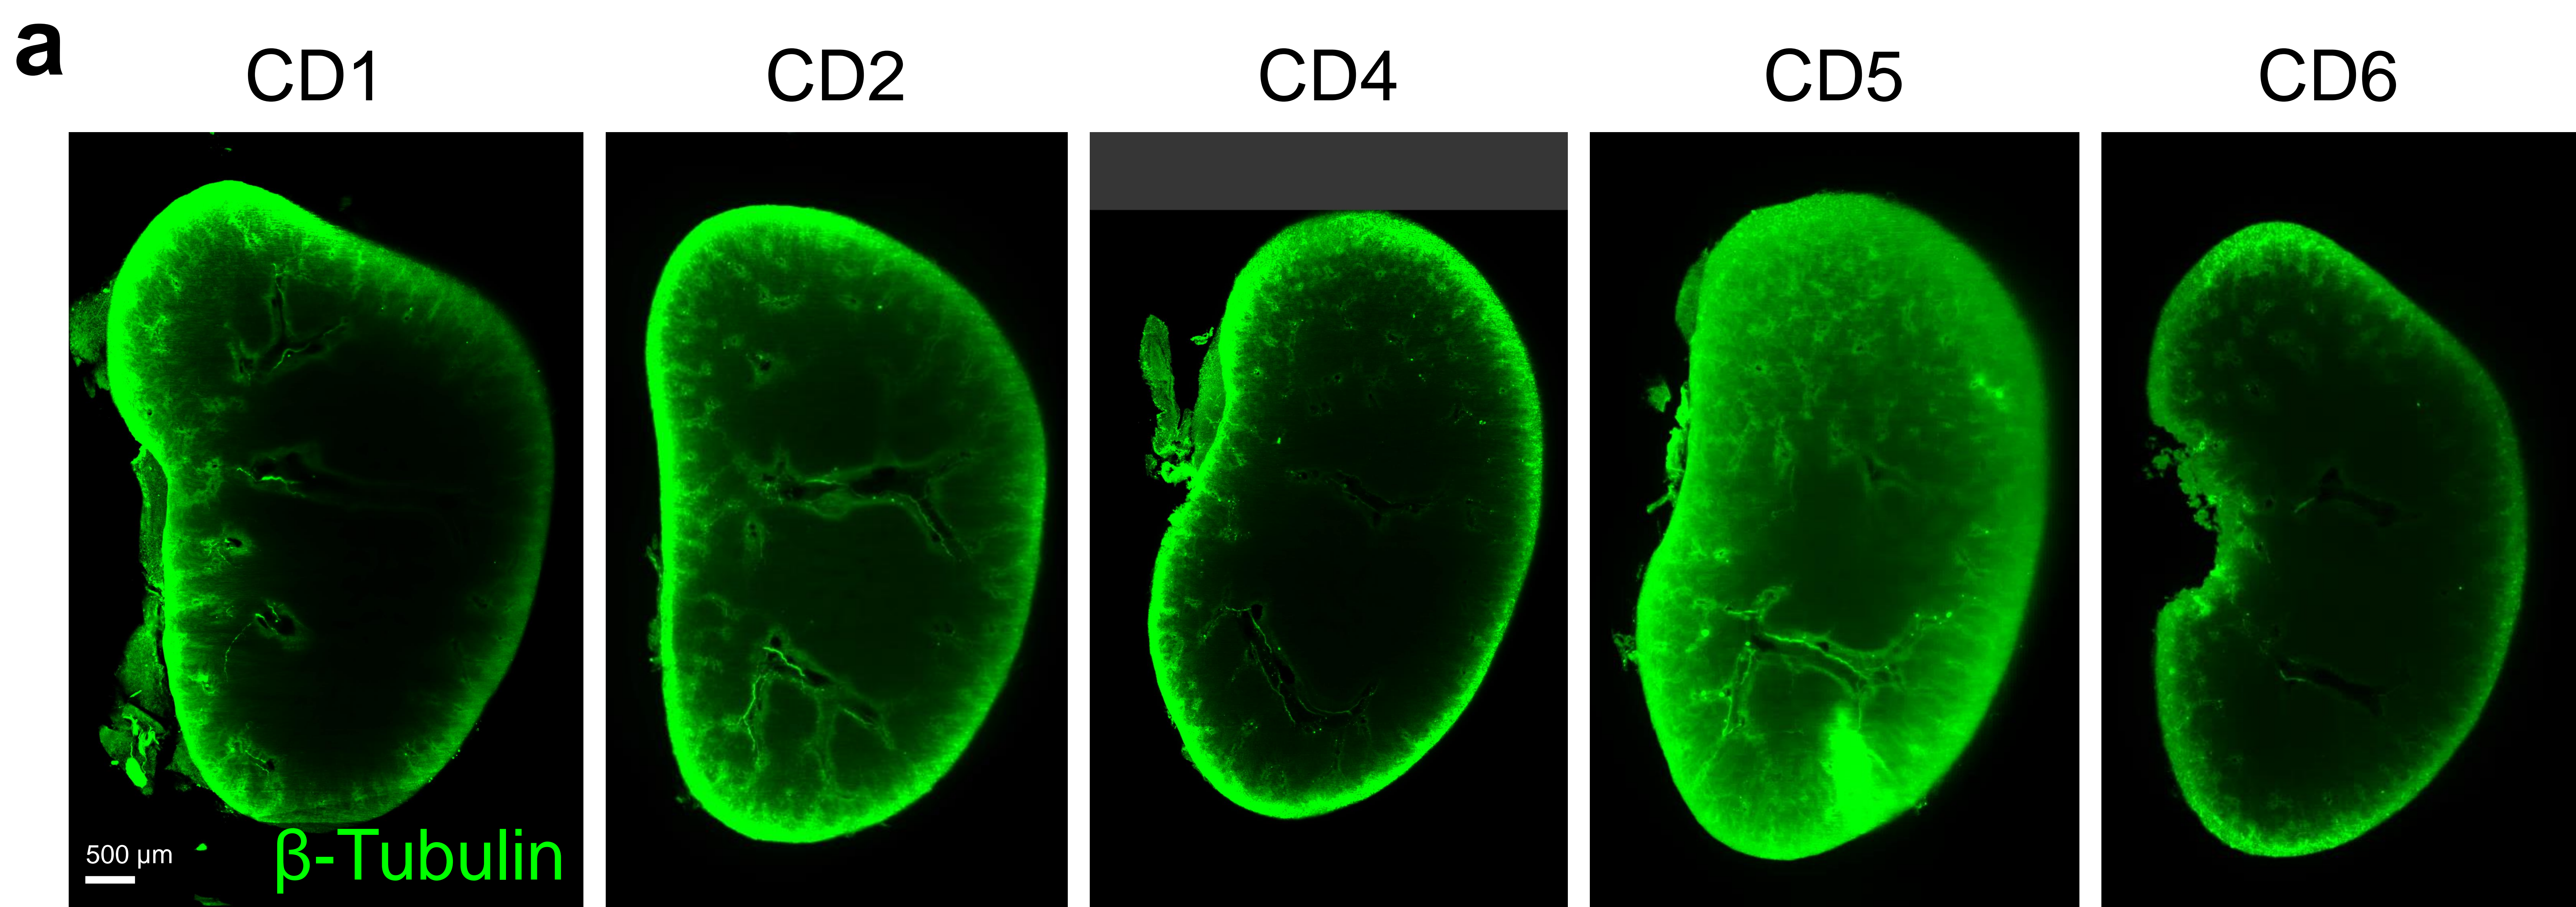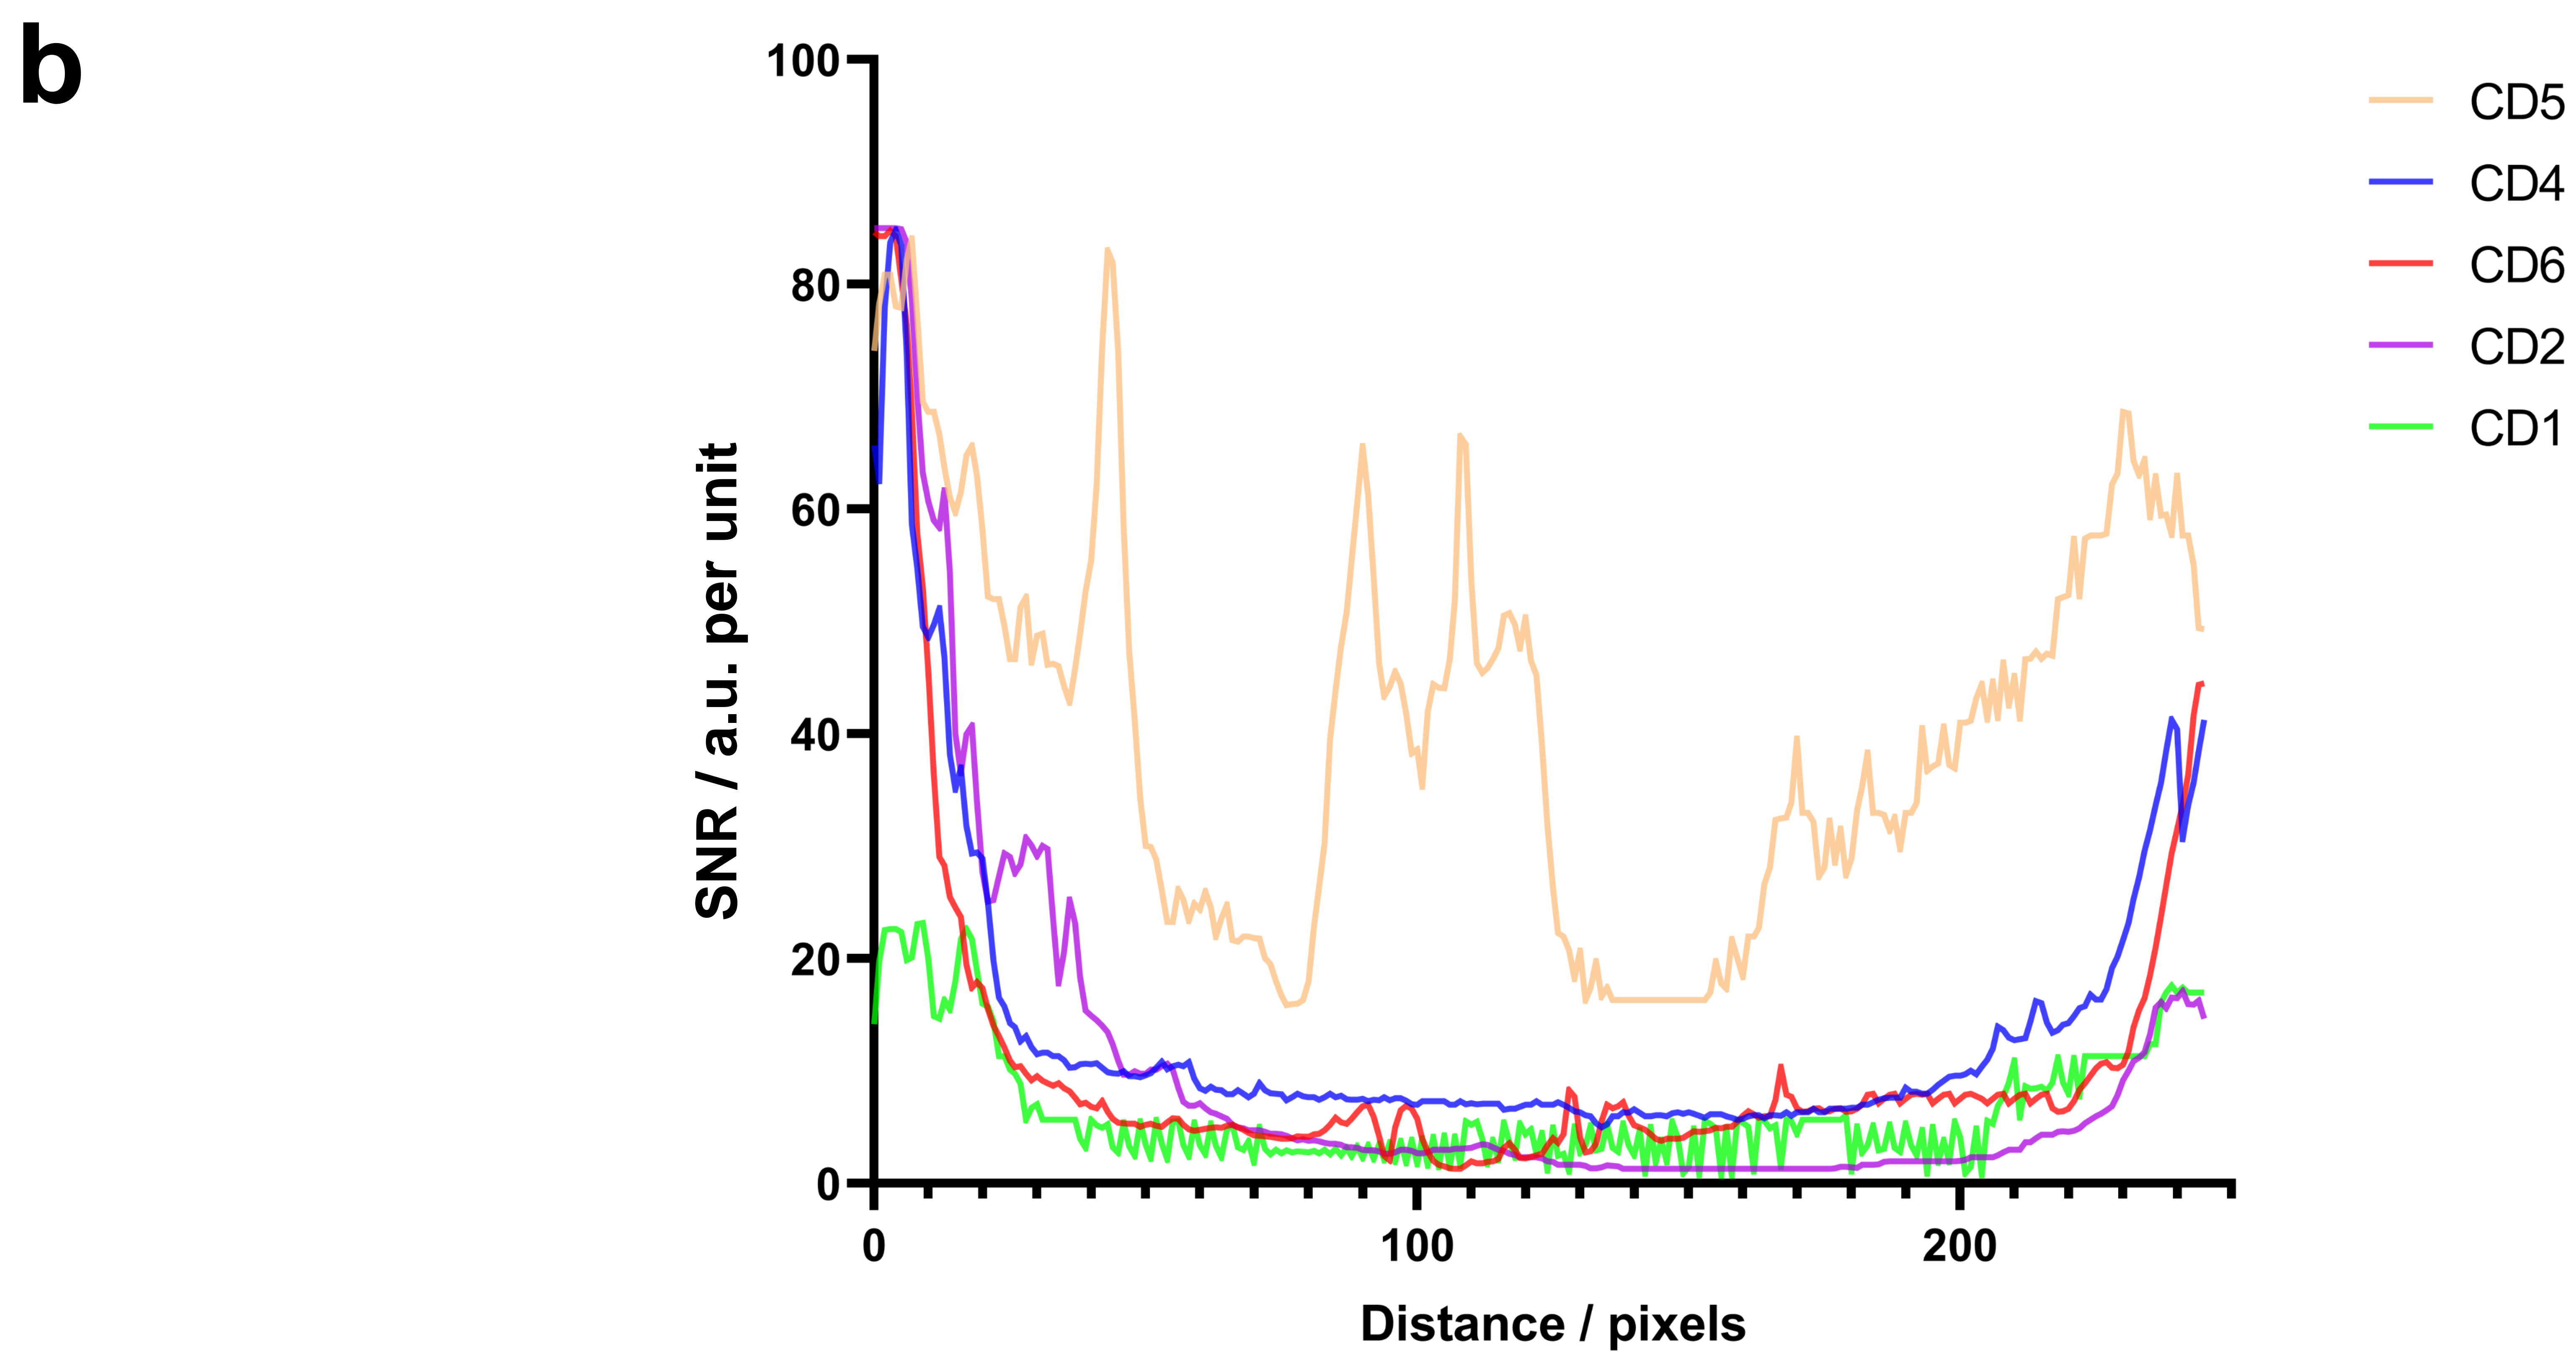

### Supplementary Figure 3

#### Screening CDs for antibody staining of mouse kidney

(a) Representative 2D optical images of beta-tubulin antibody staining of mouse kidney after permeabilization with various CD-containing solutions. CD5 is shown to greatly enhance tissue permeabilization for beta-tubulin antibody compared with others.  $n=4$ . (b) Signal to noise ratio of each mouse kidney.



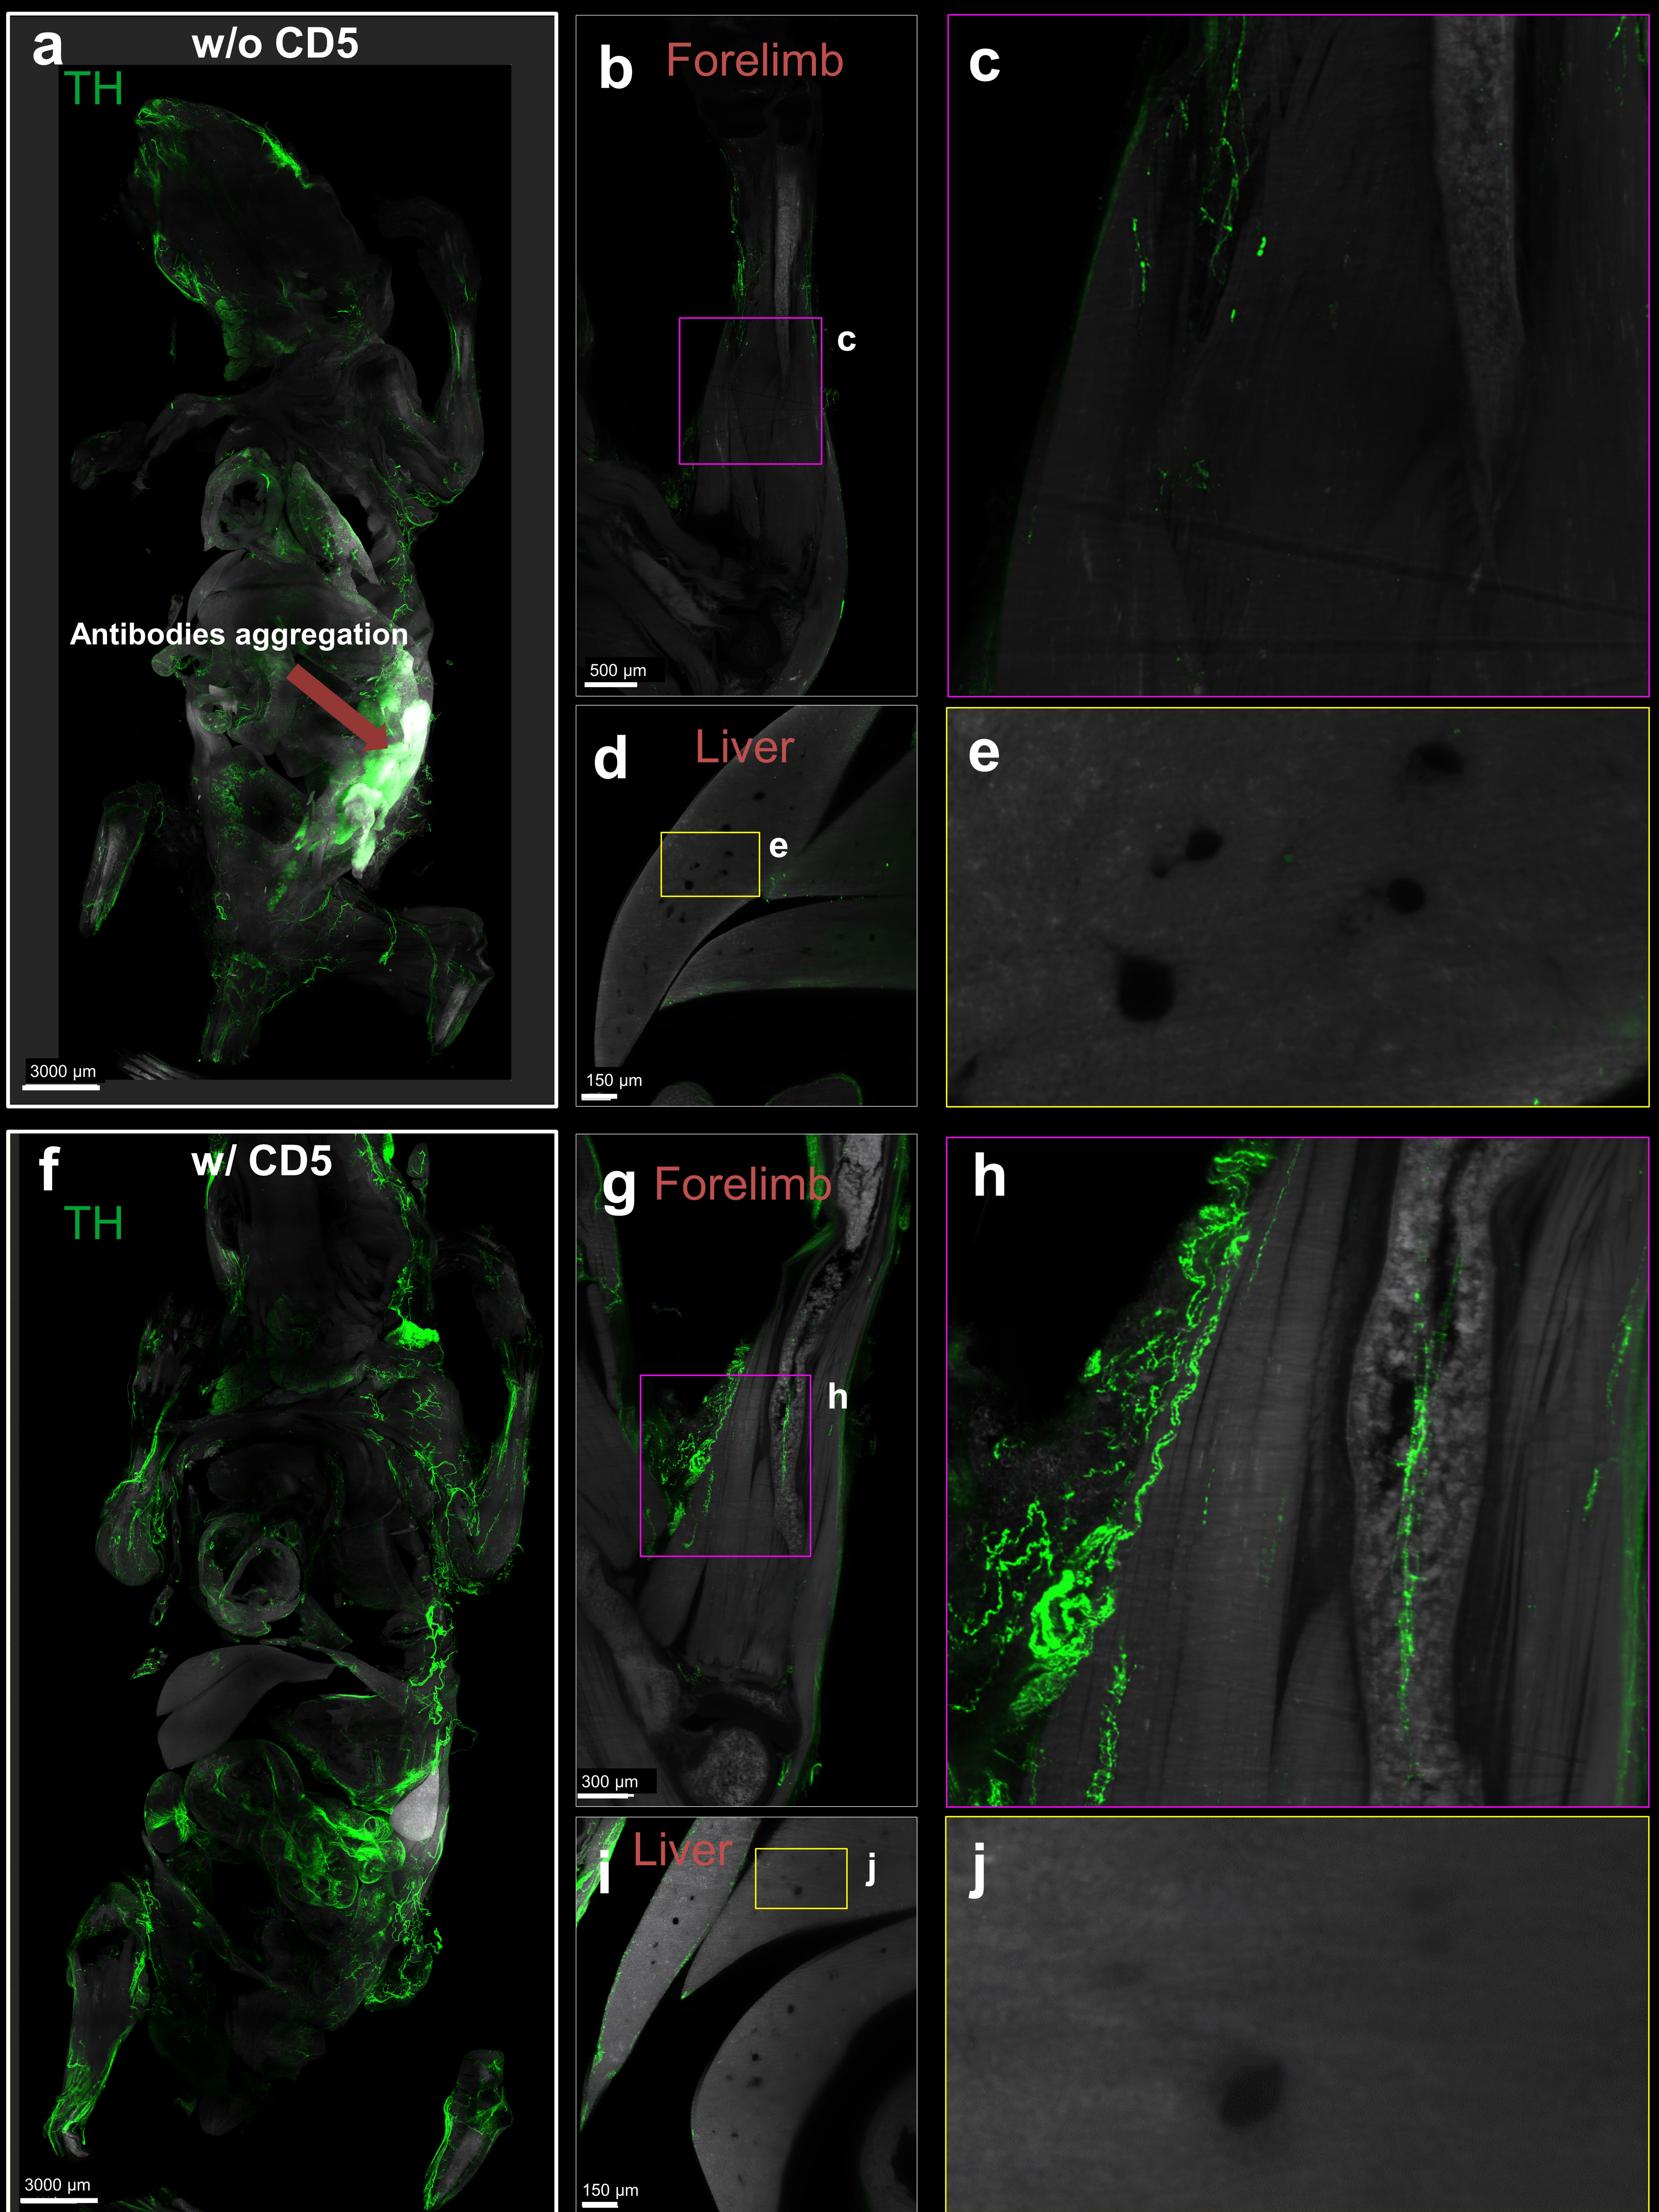

#### Supplementary Figure 4

#### Comparison of passive staining with or without CD5 chemical

(a) Passive immunostaining of TH antibody in the whole mouse body without CD5 chemical. Arrow indicated antibody aggregation. (b) Representative images of the passive TH staining in the hindlimb without CD5 chemical treatment. TH antibody is very hard to penetrate in the bone marrow(c). (d-e) There is no TH staining in the liver using passive staining without CD5 treatment. (f) Passive immunostaining of TH antibody in the whole mouse body with CD5 chemical. (g) Representative images of the passive TH staining in the hindlimb with CD5 chemical treatment and showed penetration of TH antibody in the bone marrow(h). (i-j) There is no TH staining in the liver using passive staining even with CD5 treatment. (a-j), n=3.



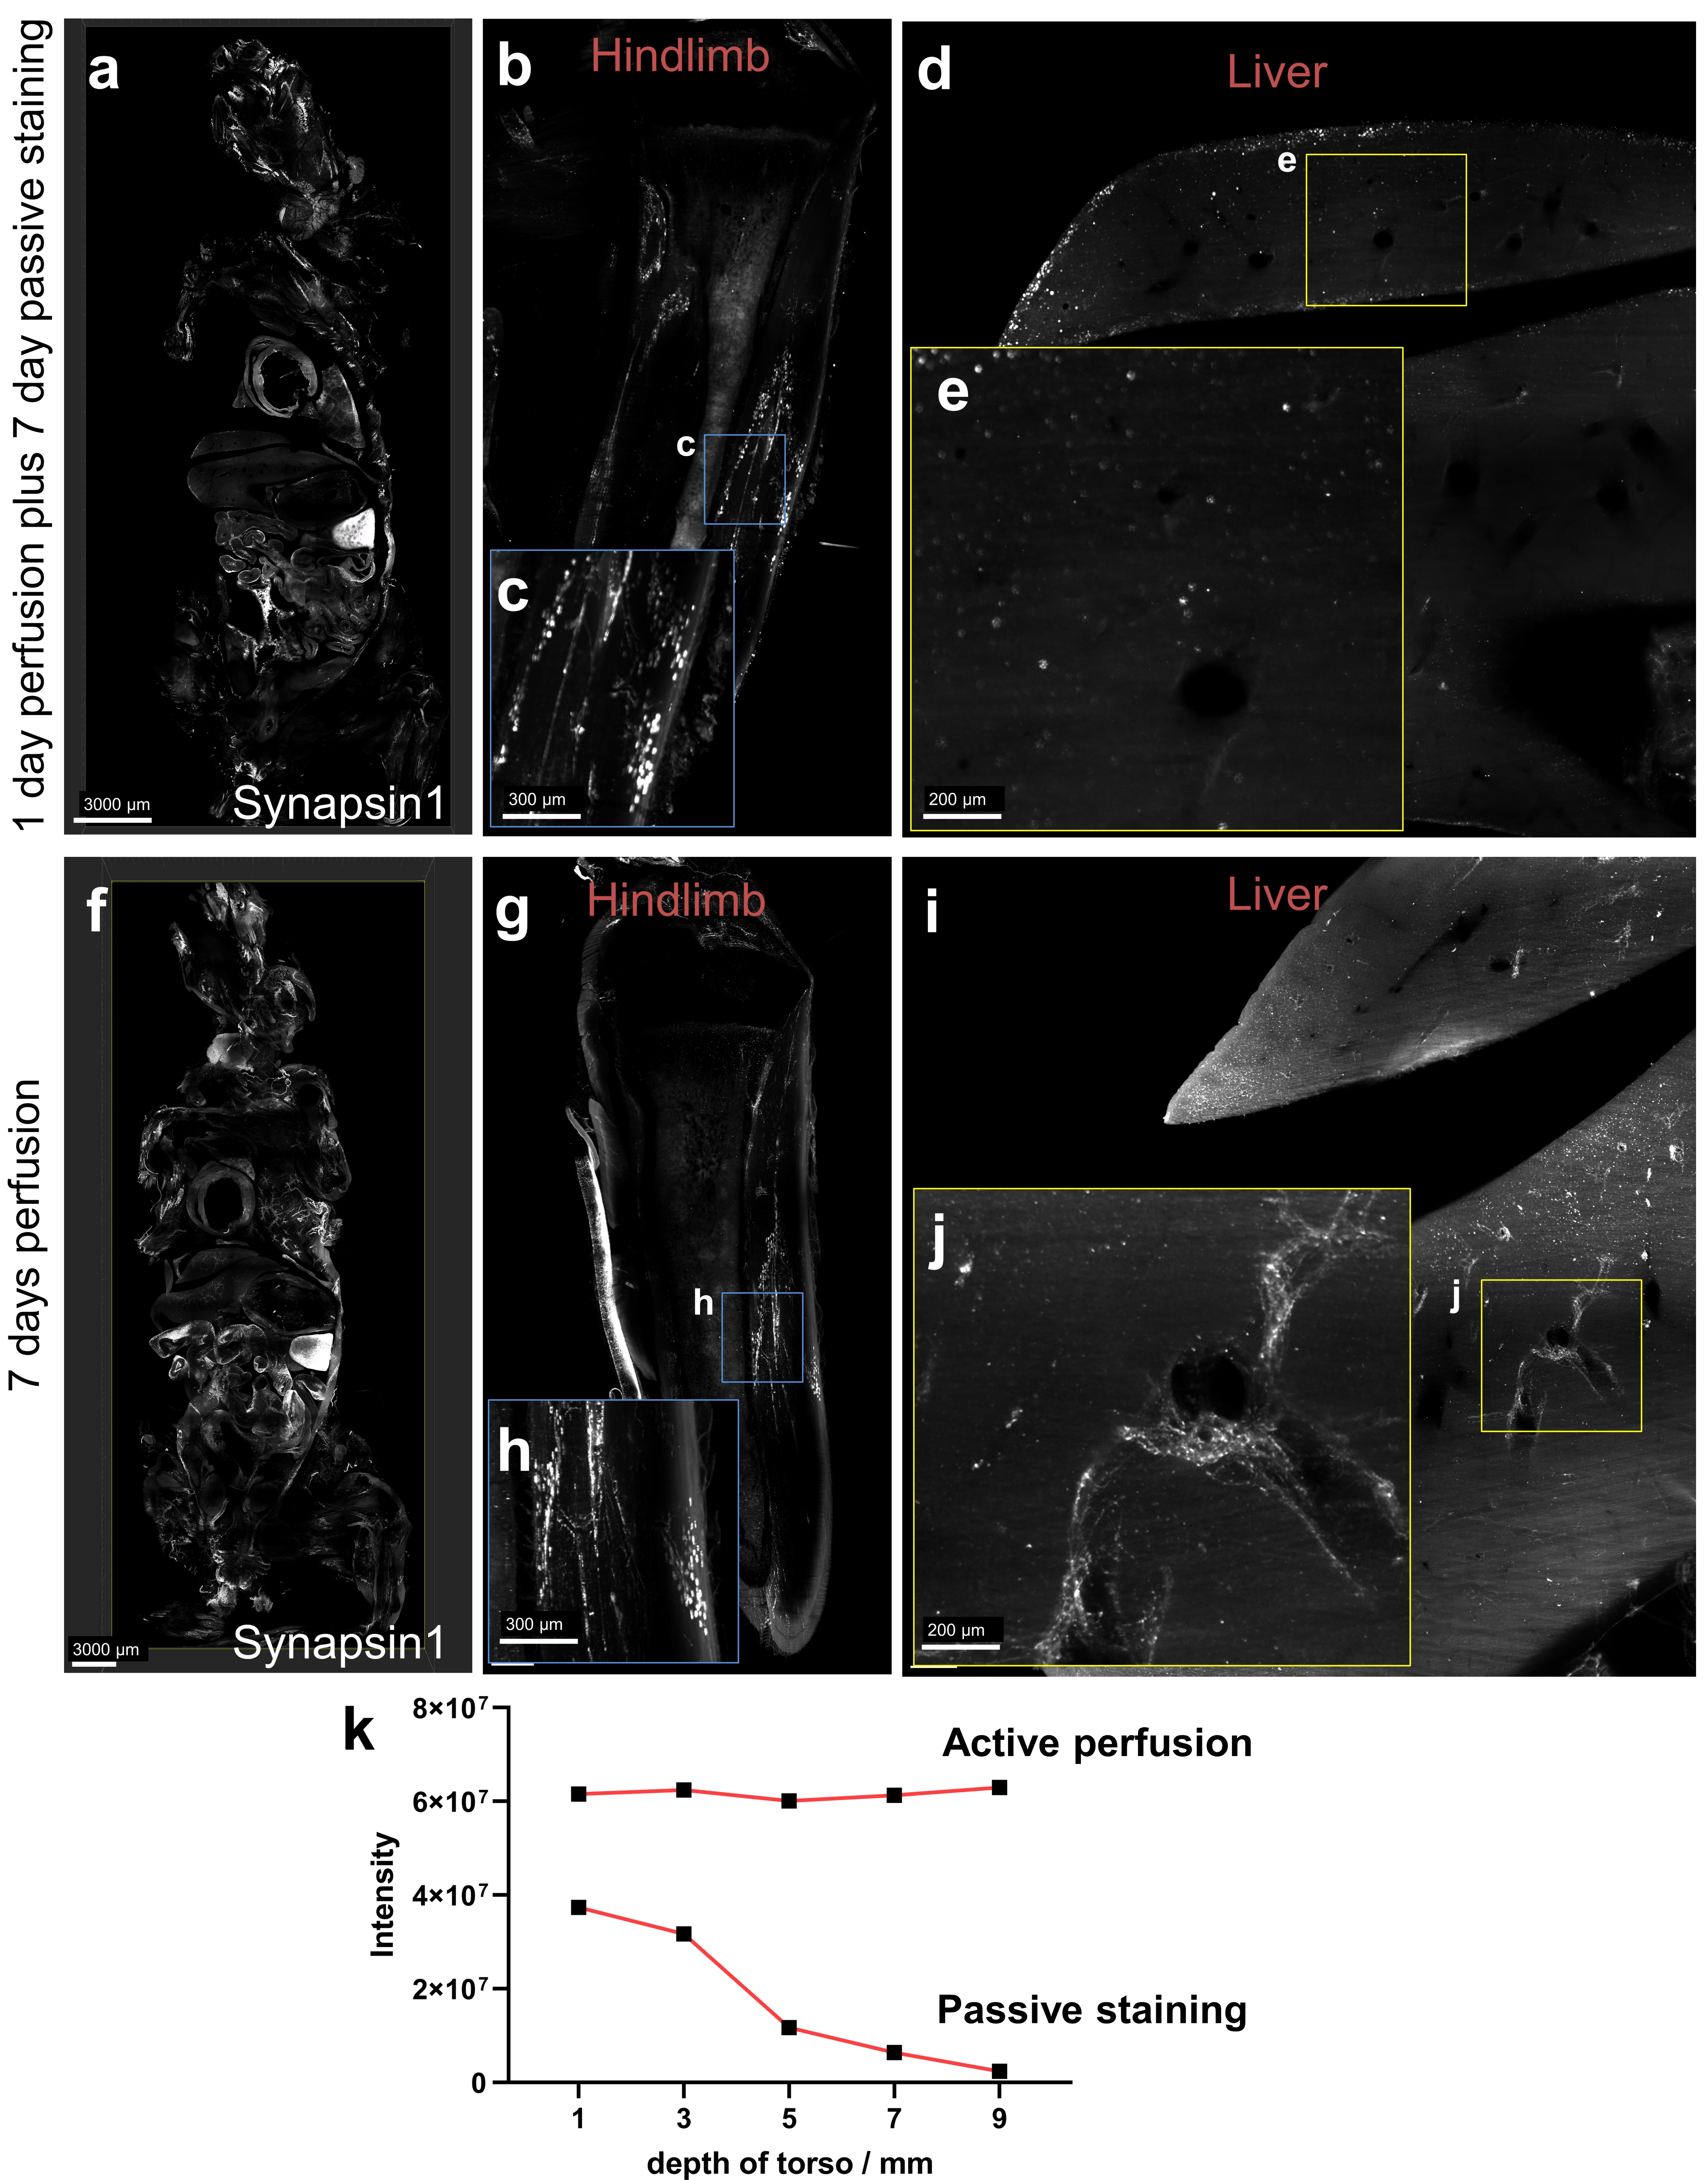

### Supplementary Figure 5

#### Comparison of wildDISCO with active pumping and passive incubation labelling

(a) 2D optical image of immunostaining of the antibody synapsin-1 in the whole mouse body with 1-day perfusion and 7-day passive staining. (b-c) Representative images of hindlimb regions showing synapsin-1-positive neuromuscular junctions (b), with a higher magnification region (c). (d-e) Representative images of the lack of synapsin-1 in the liver with 1 day of perfusion and 7 days of passive staining compared to wildDISCO method 7 days of perfusion. (f) 2D optical image of immunostaining of synapsin-1 antibody in the whole mouse body with wildDISCO 7-day perfusion staining. (g-h) Representative images of synapsin-1 staining in the hindlimb with 7-day perfusion (g), with a higher magnification region (h). (i-j) Representative images of synapsin-1 positive staining in the liver using the wildDISCO method and with a higher magnification region. (a-j), n=3. (k) Profile intensity plot along the depth of each mice liver compared active perfusion and passive staining.



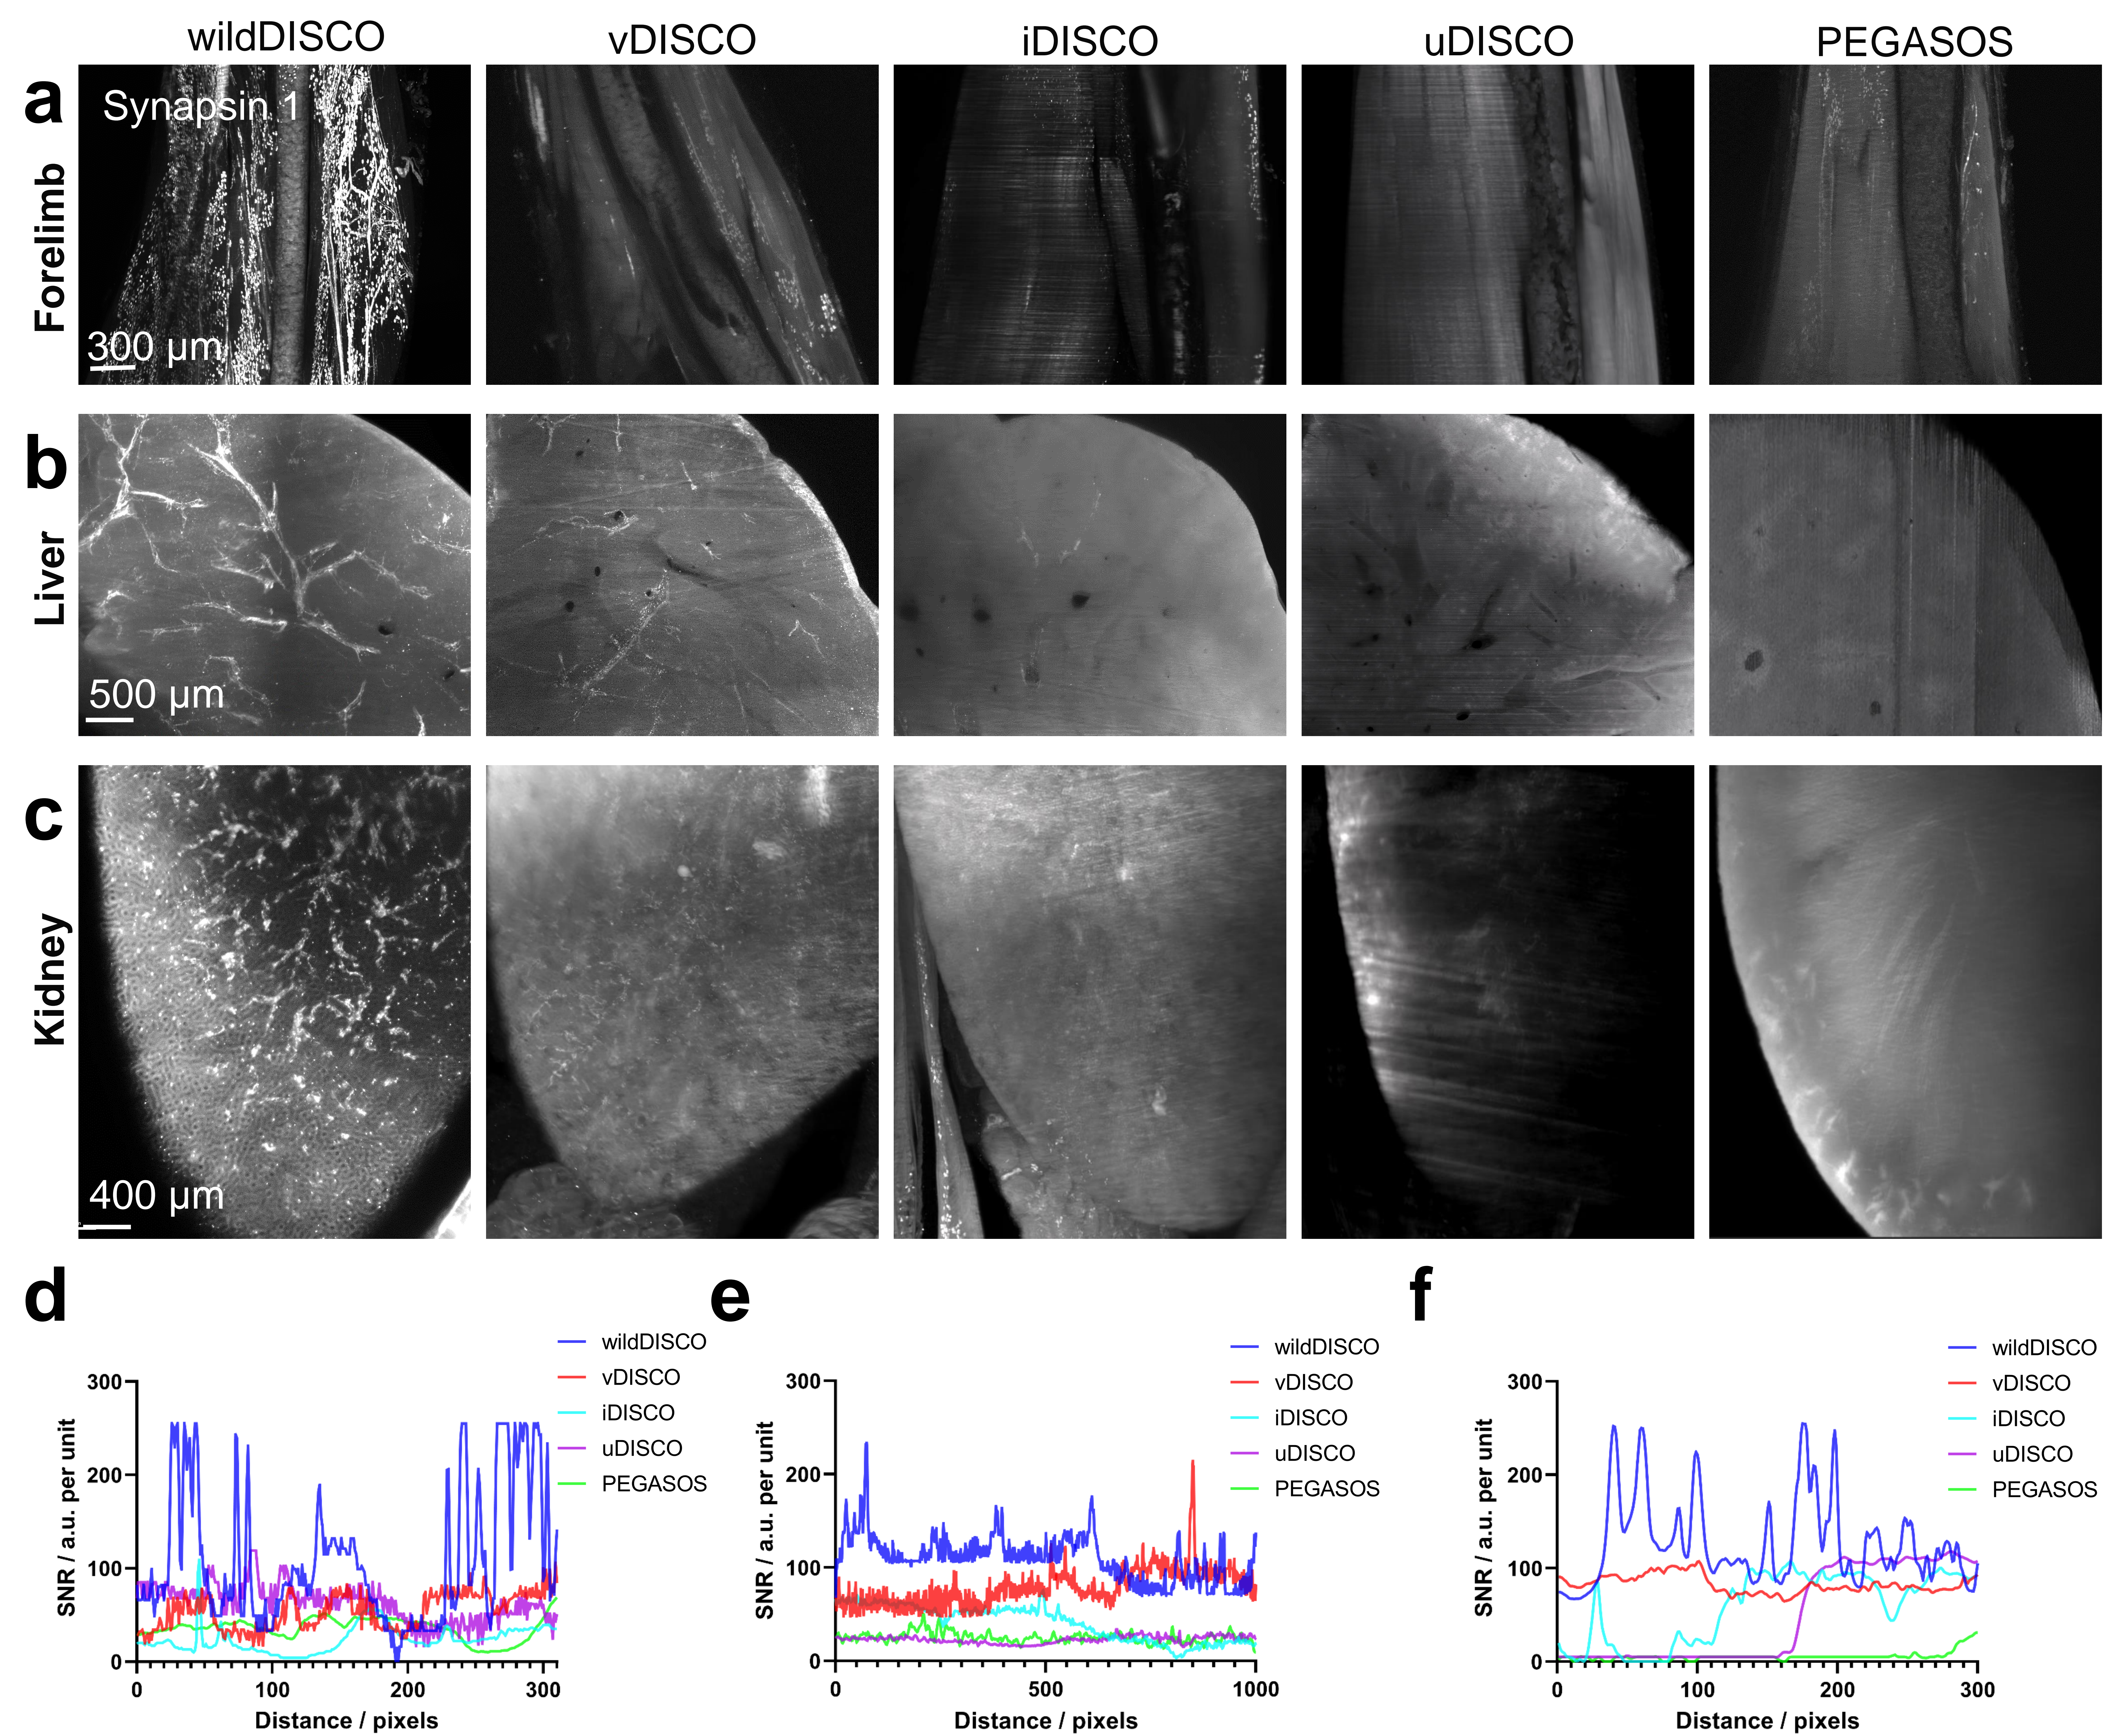

### Supplementary Figure 6

#### Comparison of the different clearing methods using synapsin 1 staining

(a-c) Representative 2D optical images of forelimb (a), liver (b), and kidney (c) stained with synapsin-1 antibodies by wildDISCO, vDISCO, iDISCO, uDISCO, and PEGASOS methods, respectively.  $n=3$ . (d-f) Quantification of the depth of penetration of synapsin-1 antibody into the forelimbs (d), liver (e), and kidney (f) of mice using wildDISCO, vDISCO, iDISCO, uDISCO, and PEGASOS, respectively.



## TH (sympathetic nerves)

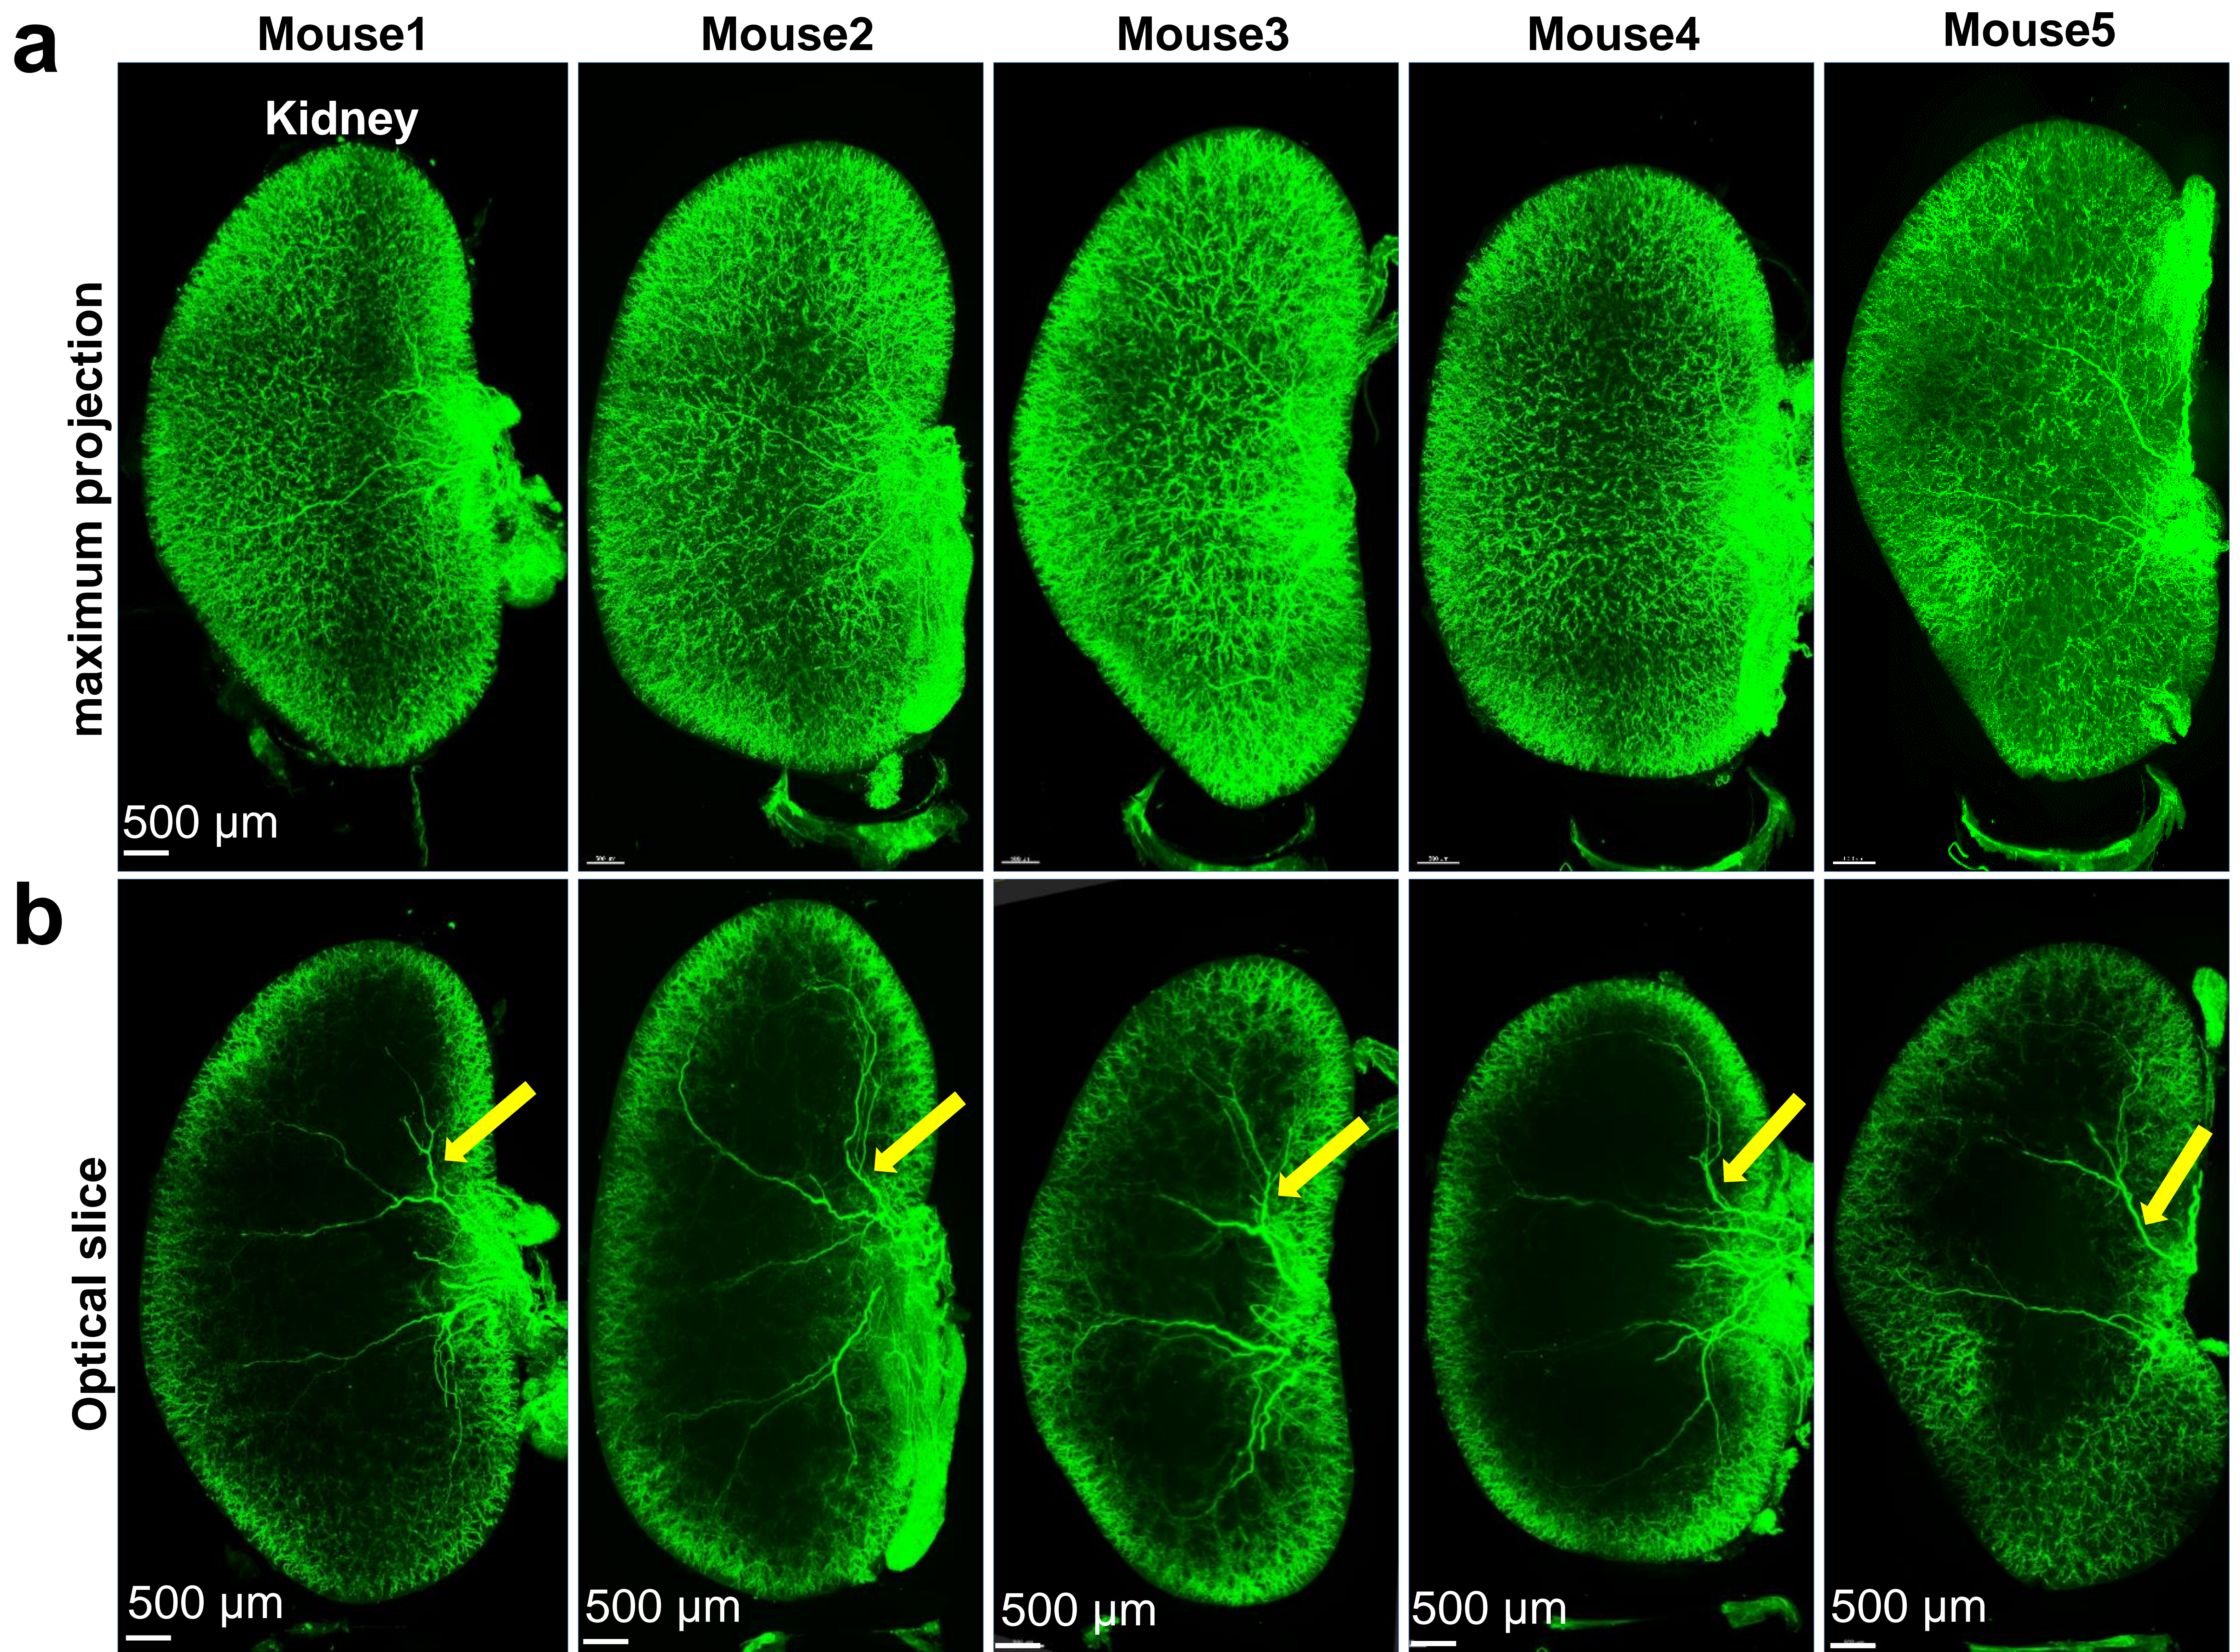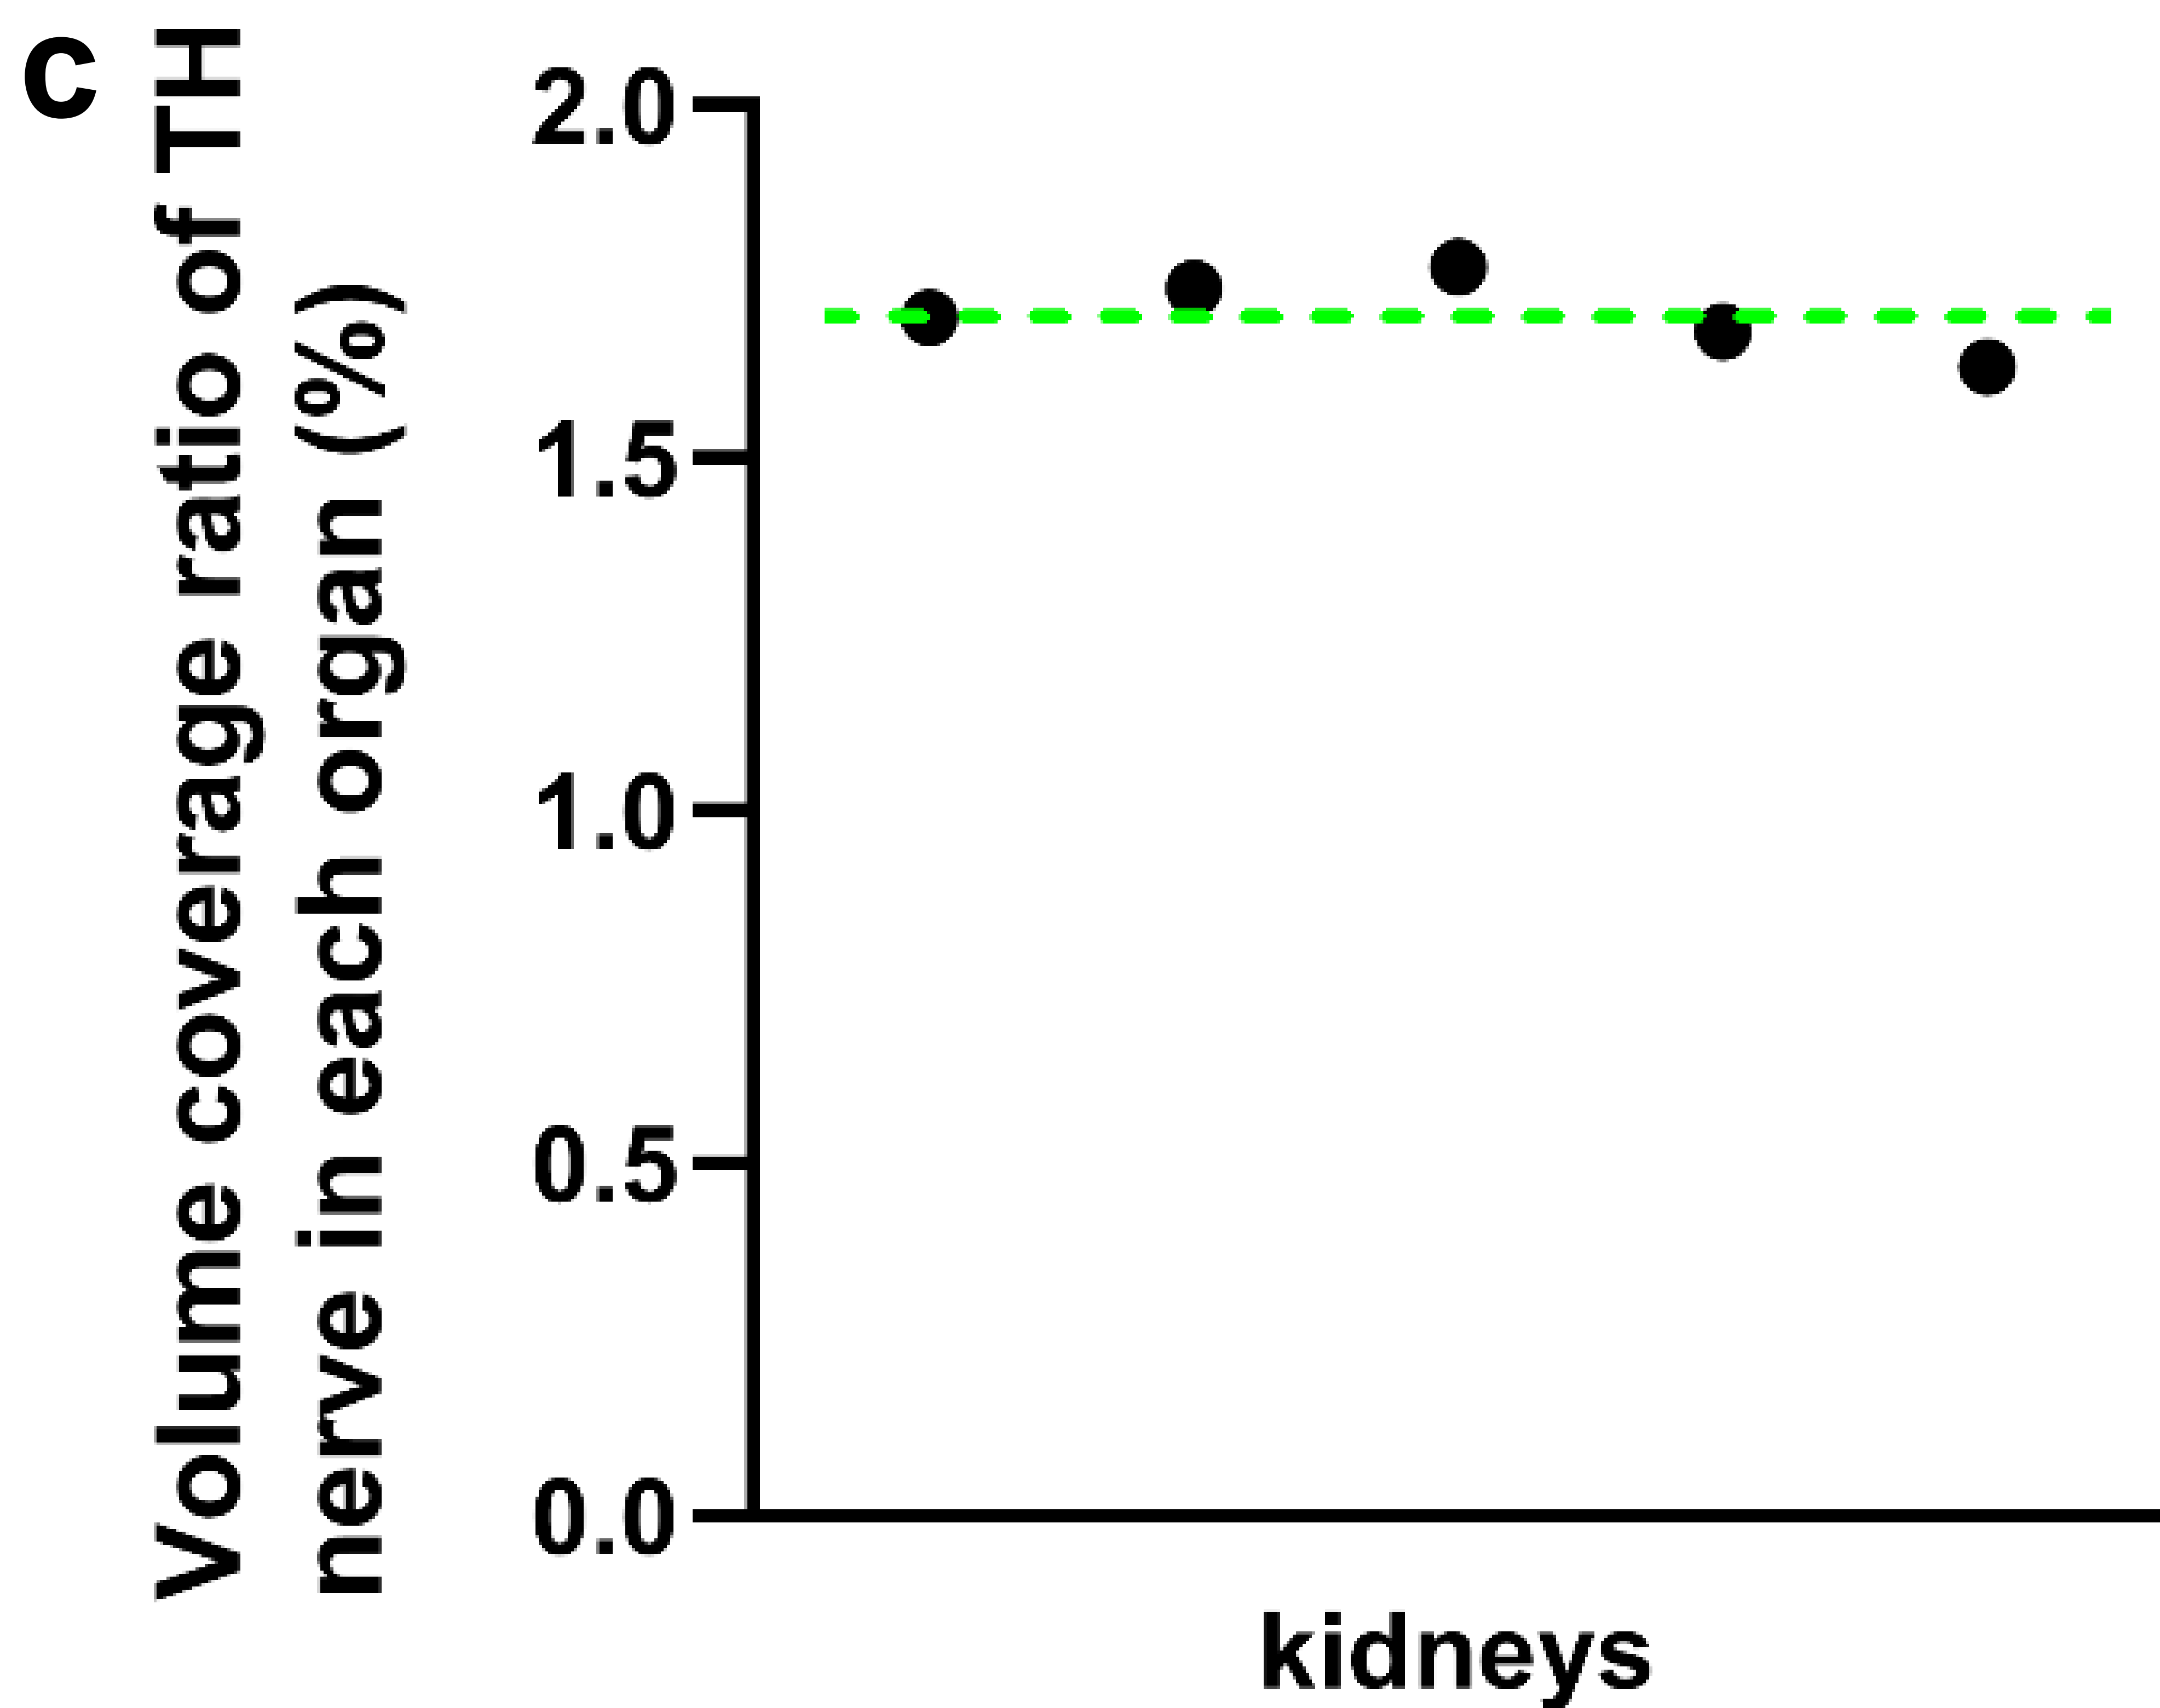

### Supplementary Figure 7

#### Variability of antibody staining in different mice

(a-b) wildDISCO method stained in different individual mice and representative images of maximum projection from different mouse kidneys. n=3. (c) Quantification of the volume coverage of the nerve TH in each mouse kidney and no significant differences.



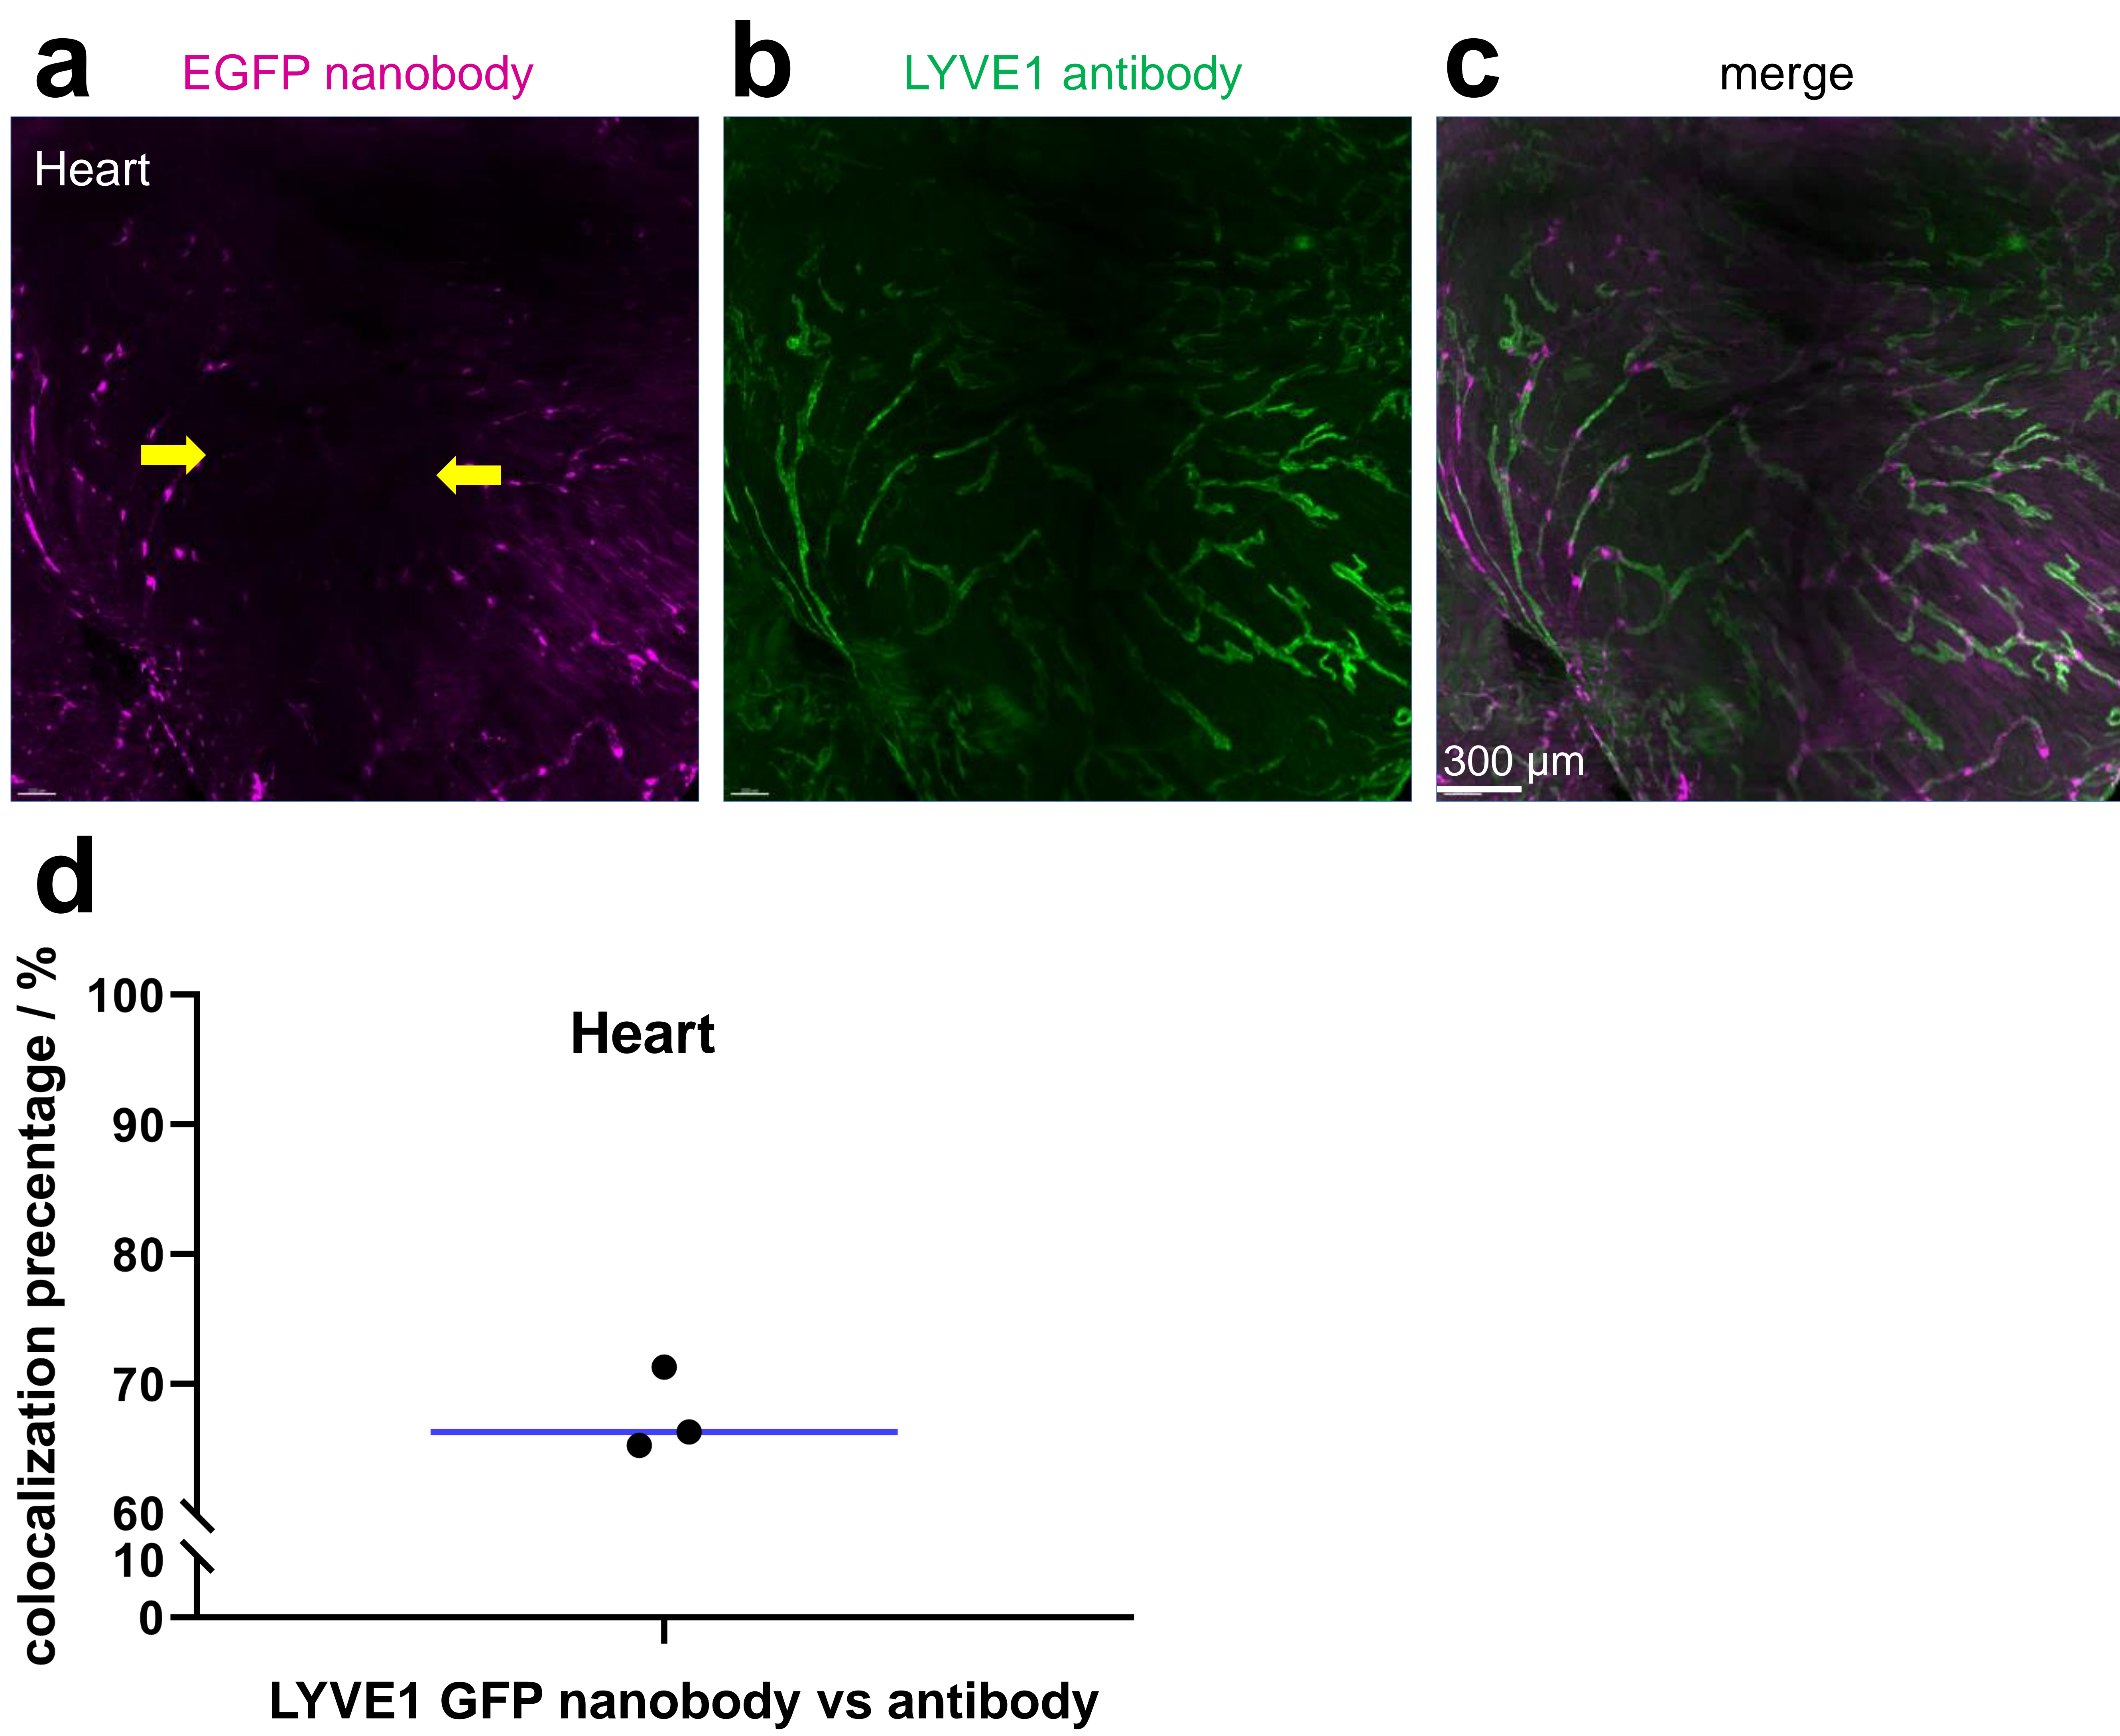

### Supplementary Figure 8

#### Transgenic LYVE1-GFP mouse compare to LYVE1 antibody staining

Immunostaining of Lyve-1 EGFP mice with transgenic fluorescent protein EGFP (a) and Lyve1 protein (b), co-localization (c) in the heart. n=3. (d) Quantification of the percentage of colocalization of Lyve1 EGFP and Lyve1 protein in the heart.



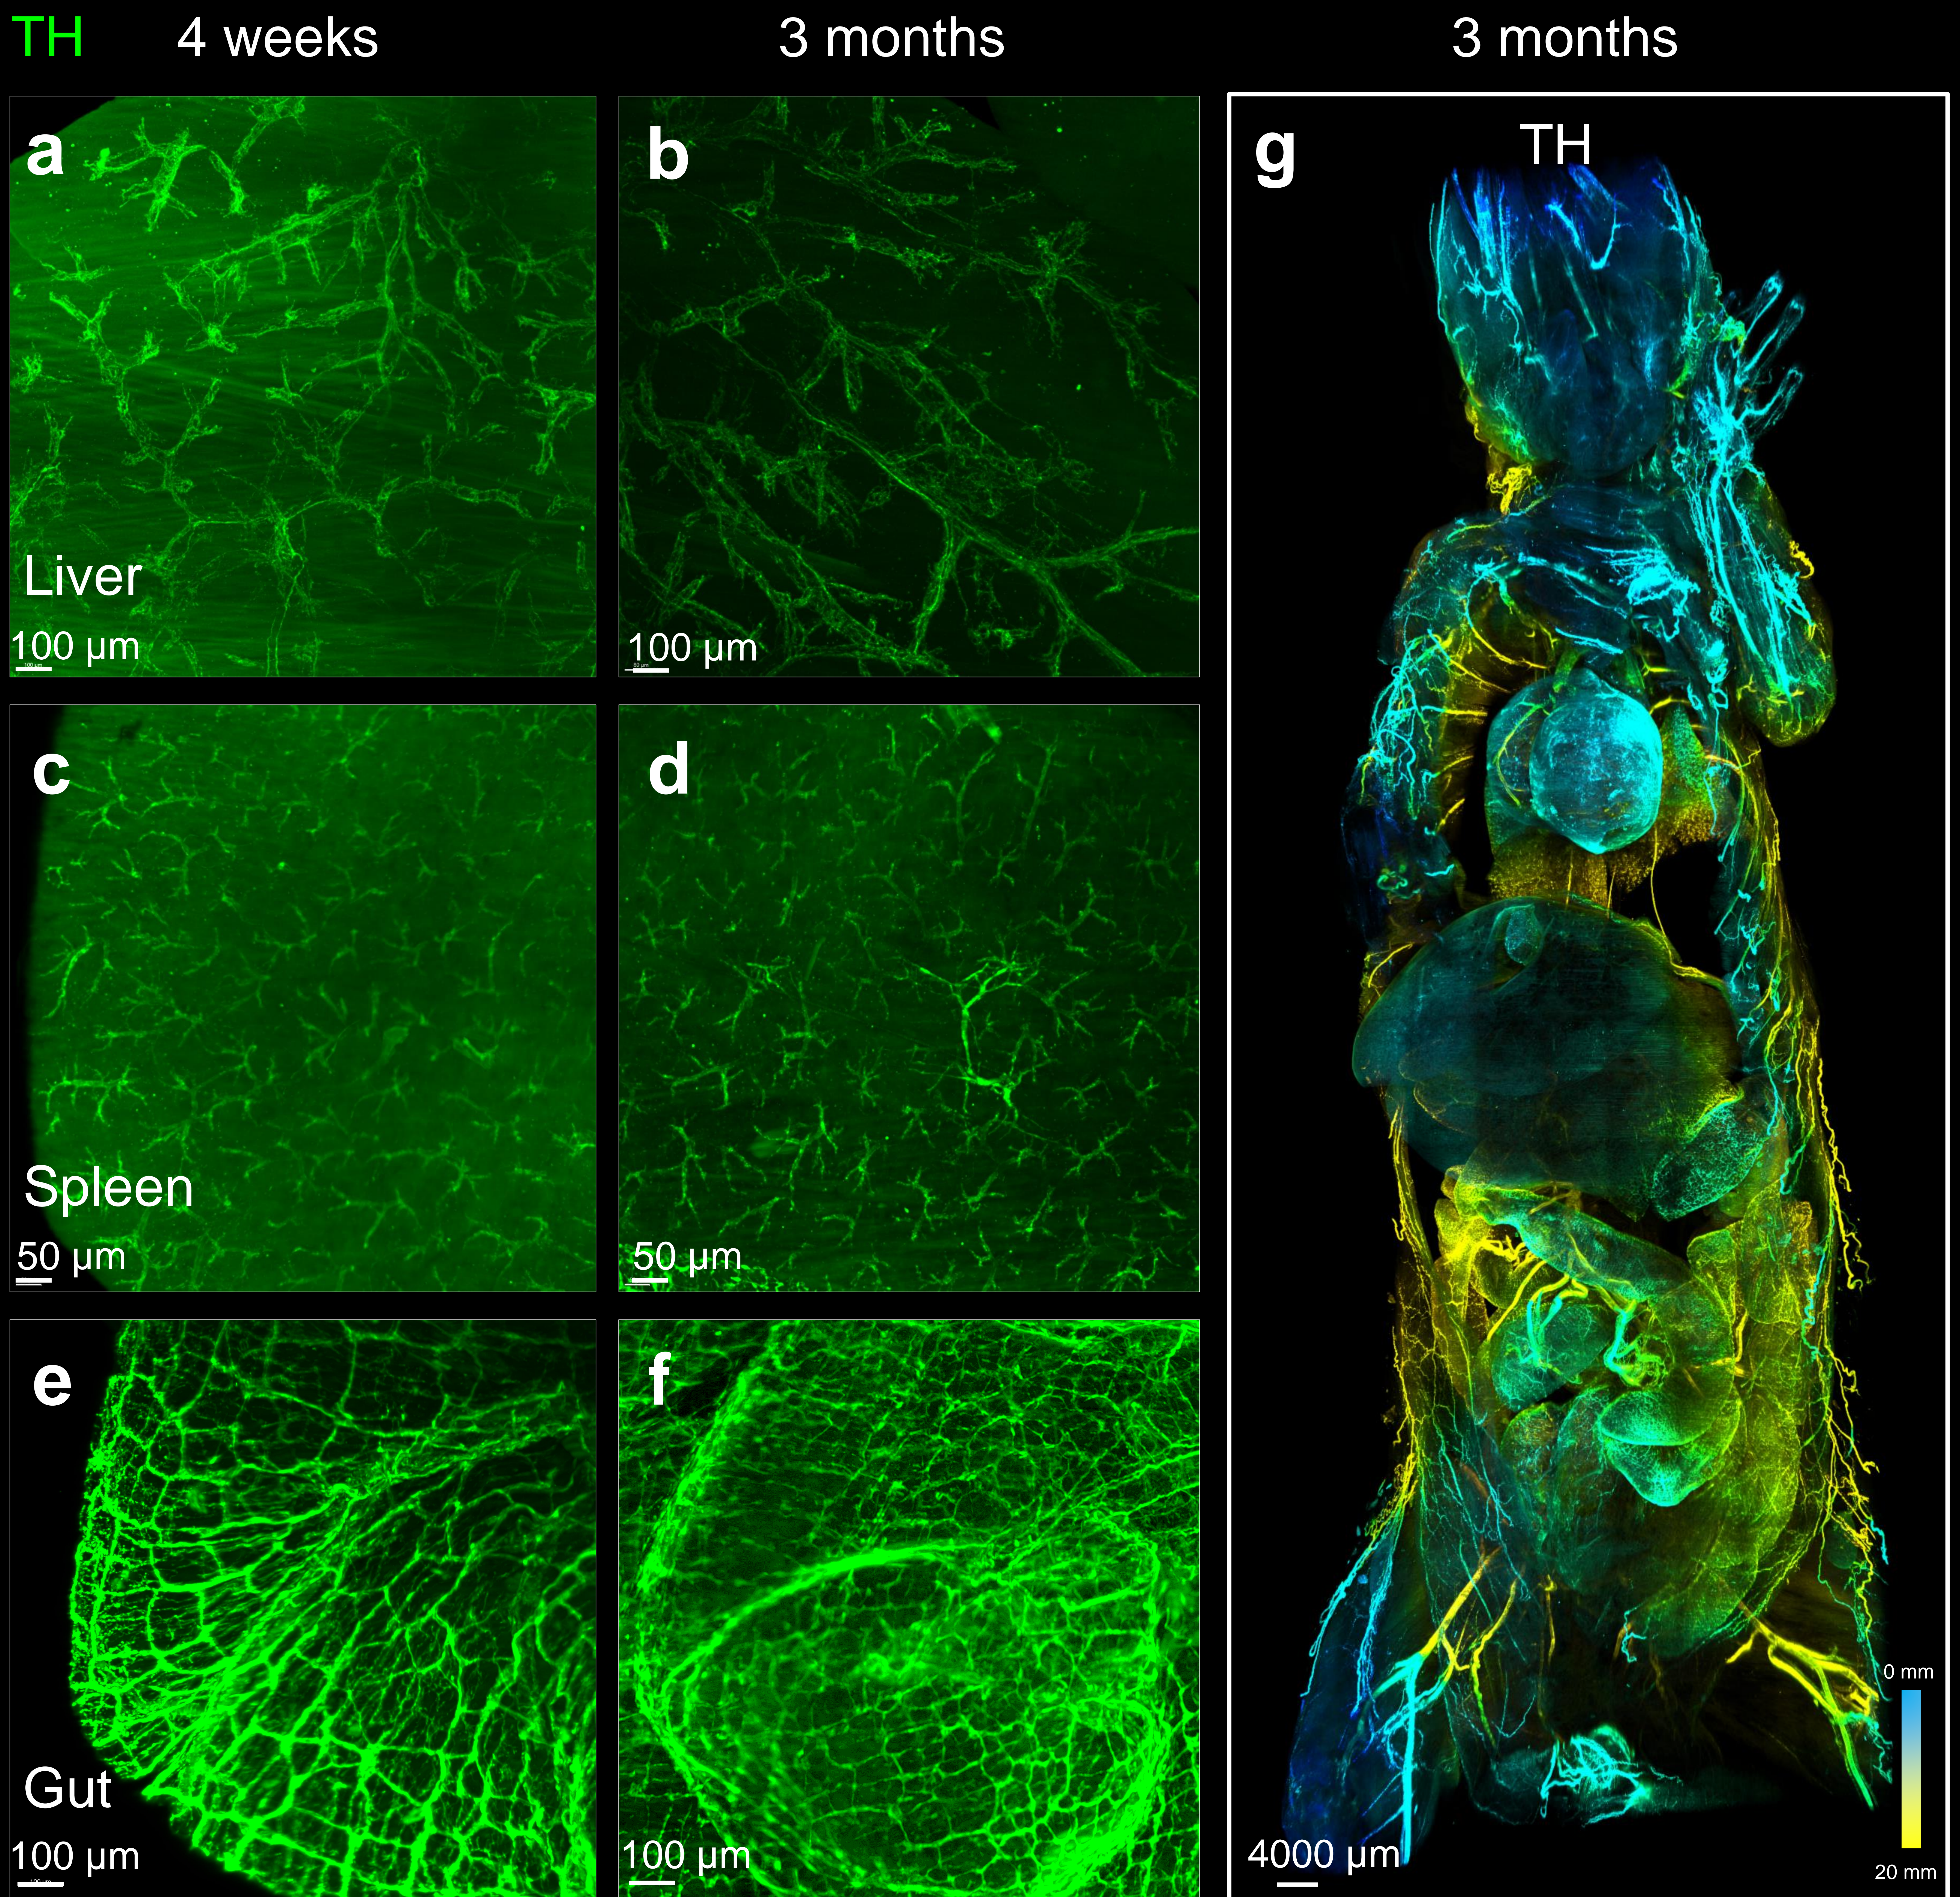

**Supplementary Figure 9**  
**wildDISCO is applicable to mice up to 3 months old**

(a-b) Representative 3D images of TH-positive staining in the liver using the wildDISCO method on 4 weeks old (a) and 3 months old (b) mouse. (c-d) Representative 3D images of TH-positive staining in the kidney. (e-f) Representative 3D images of TH-positive staining in the gut. (g) wildDISCO-compatible immunostaining of TH in the 3-month-old mouse body (depth color). Experiment was done in triplicate.



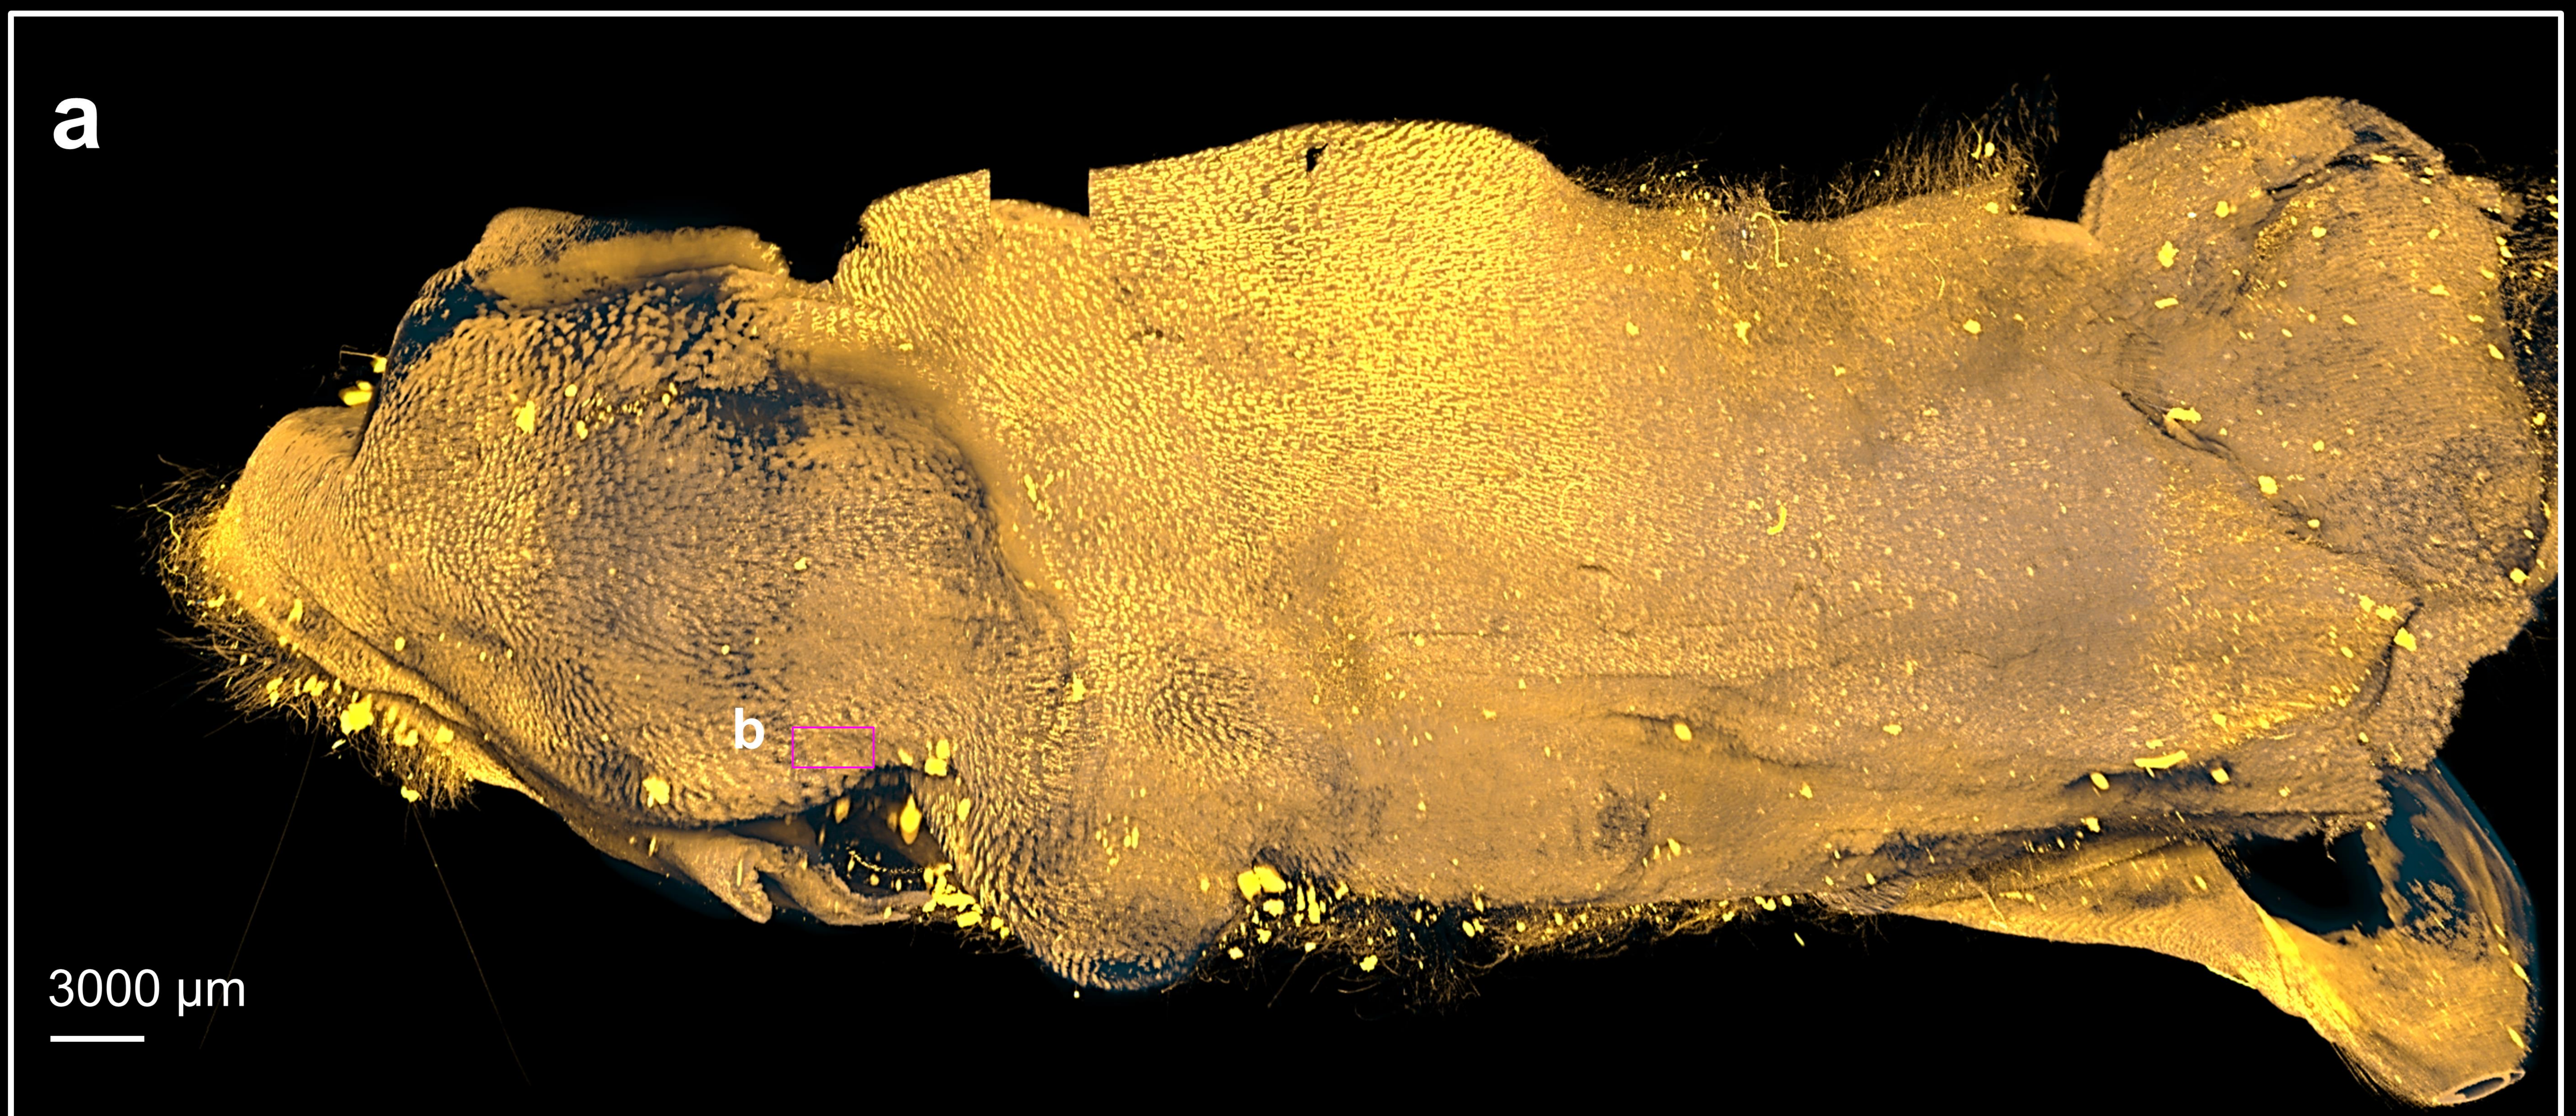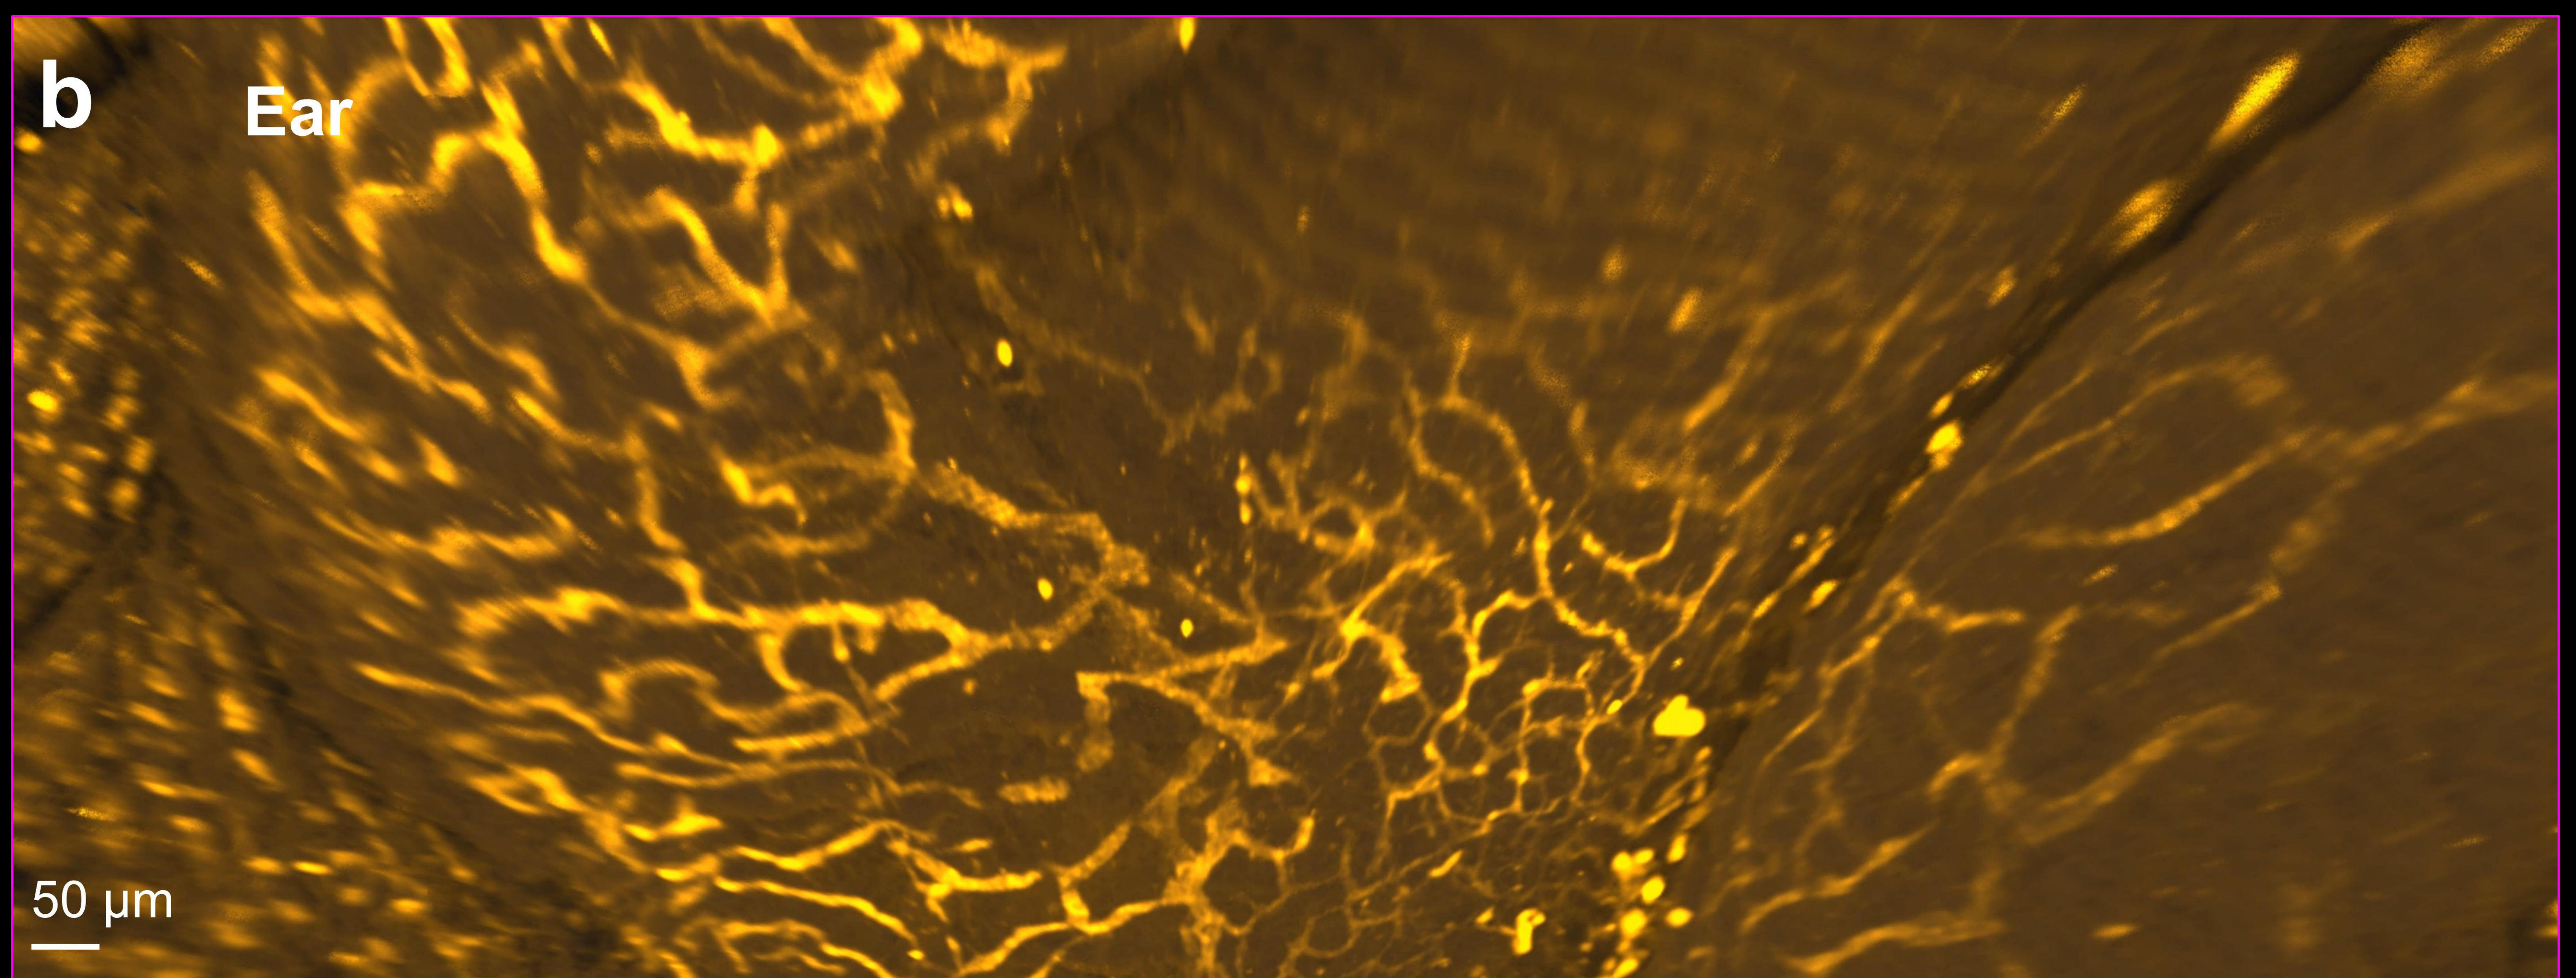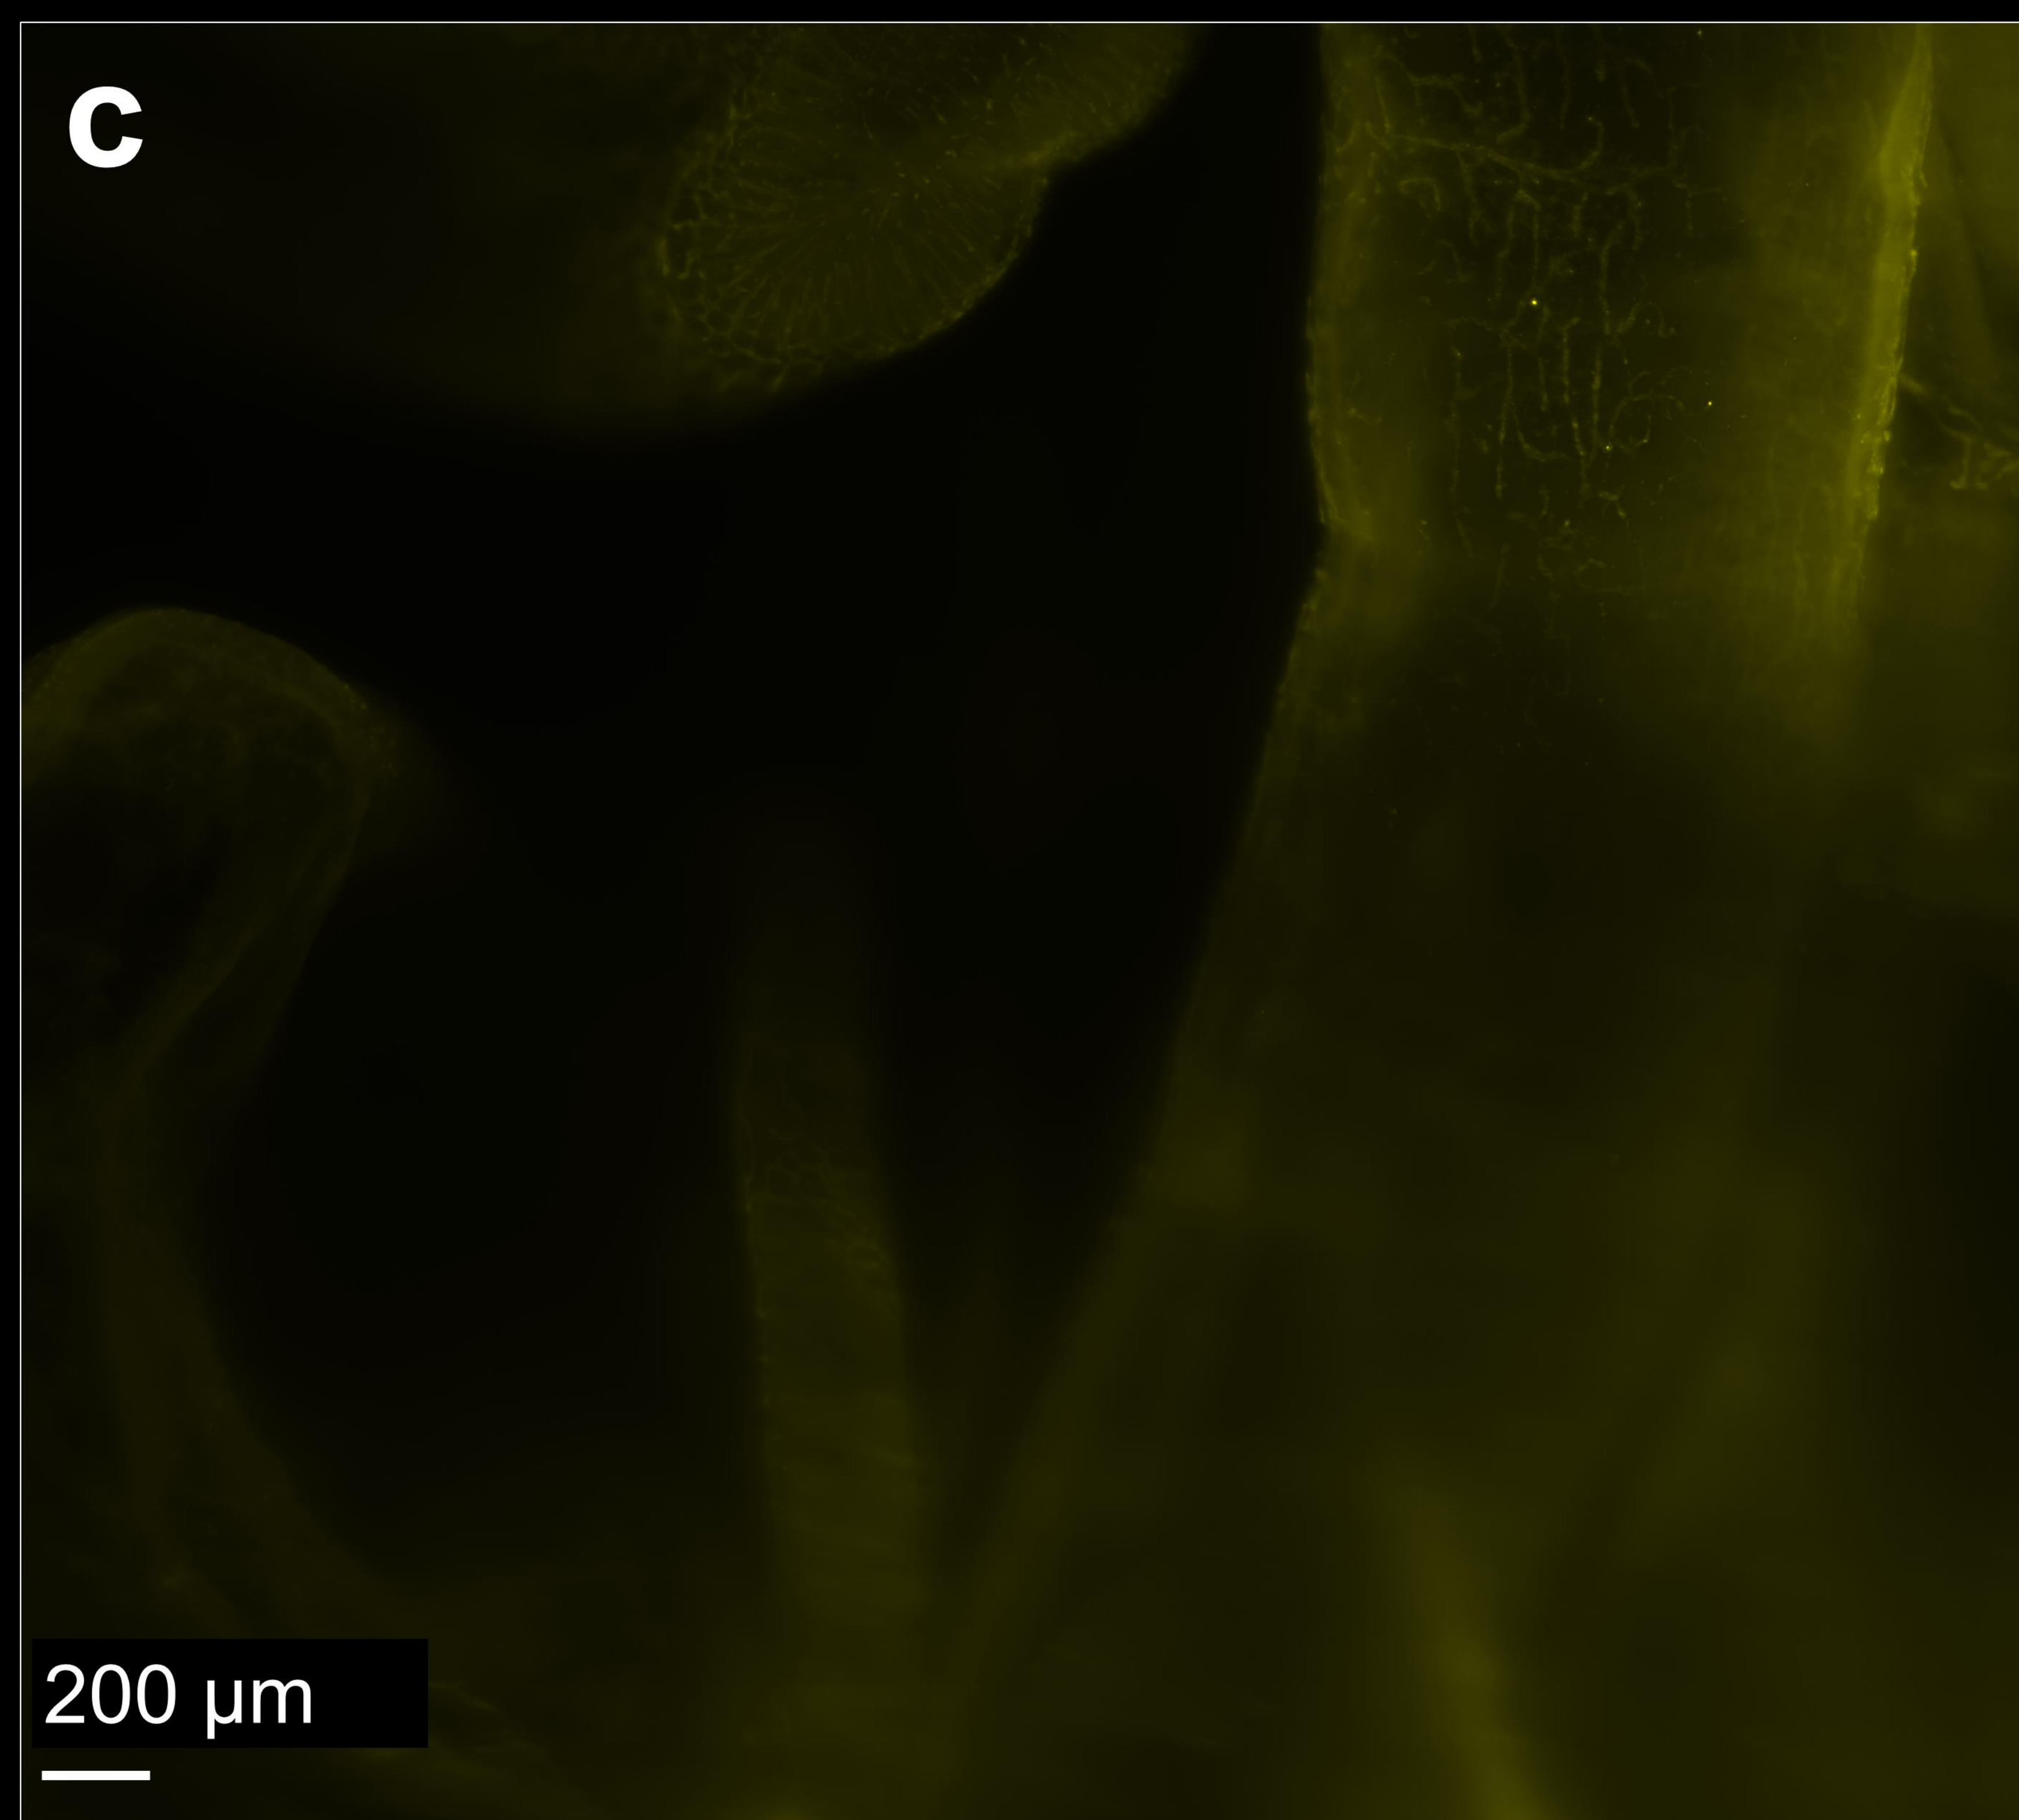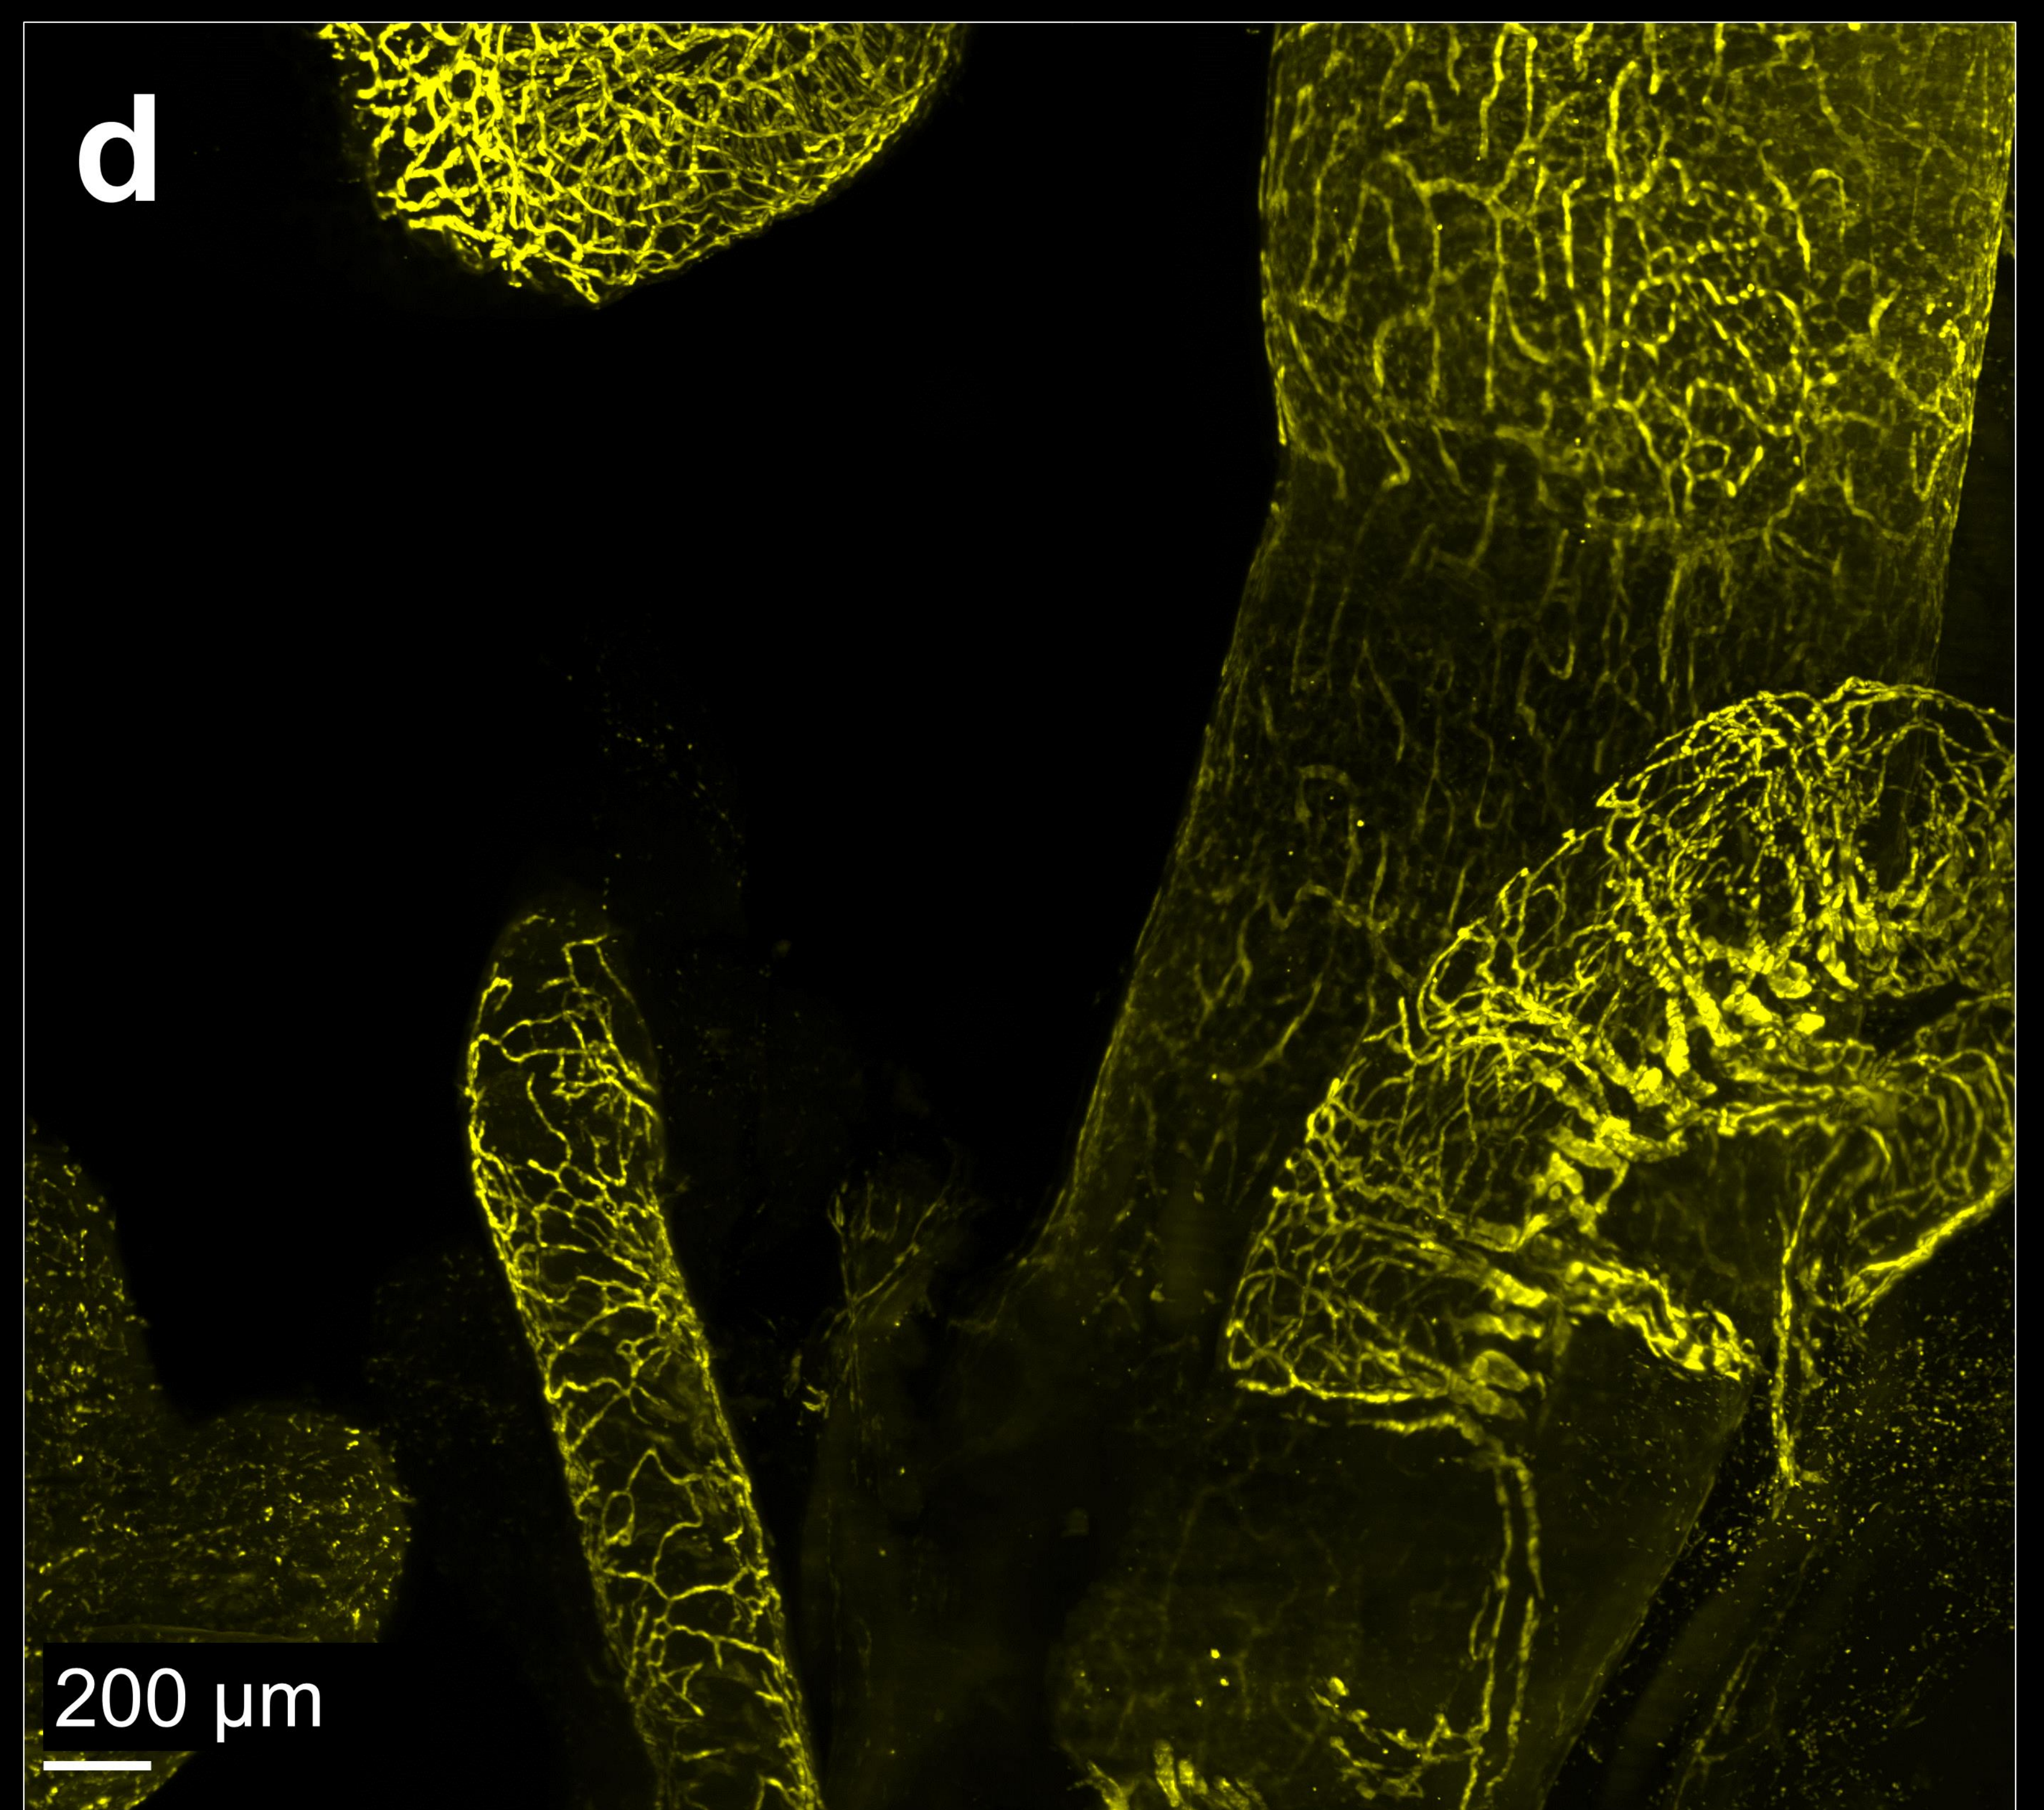

### Supplementary Figure 10

#### Mouse with skin, labeled with LYVE1

(a) A 4-week-old Balb/c mouse was immunolabeled by wildDISCO with LYVE1 for whole mouse lymphatic vessels, and a 3D reconstruction of the whole mouse with skin was created. (b) The lymphatic vessel network in the ear regions is shown. (c) Before skin removal, the penetration of laser power through transparent skin is limited. In the internal organs (such as in the gut), visualization of lymphatic vessel is blurry. (d) After skin removal, the same regions of gut lymphatic vessel can be clearly visualized.  $n=3$ .



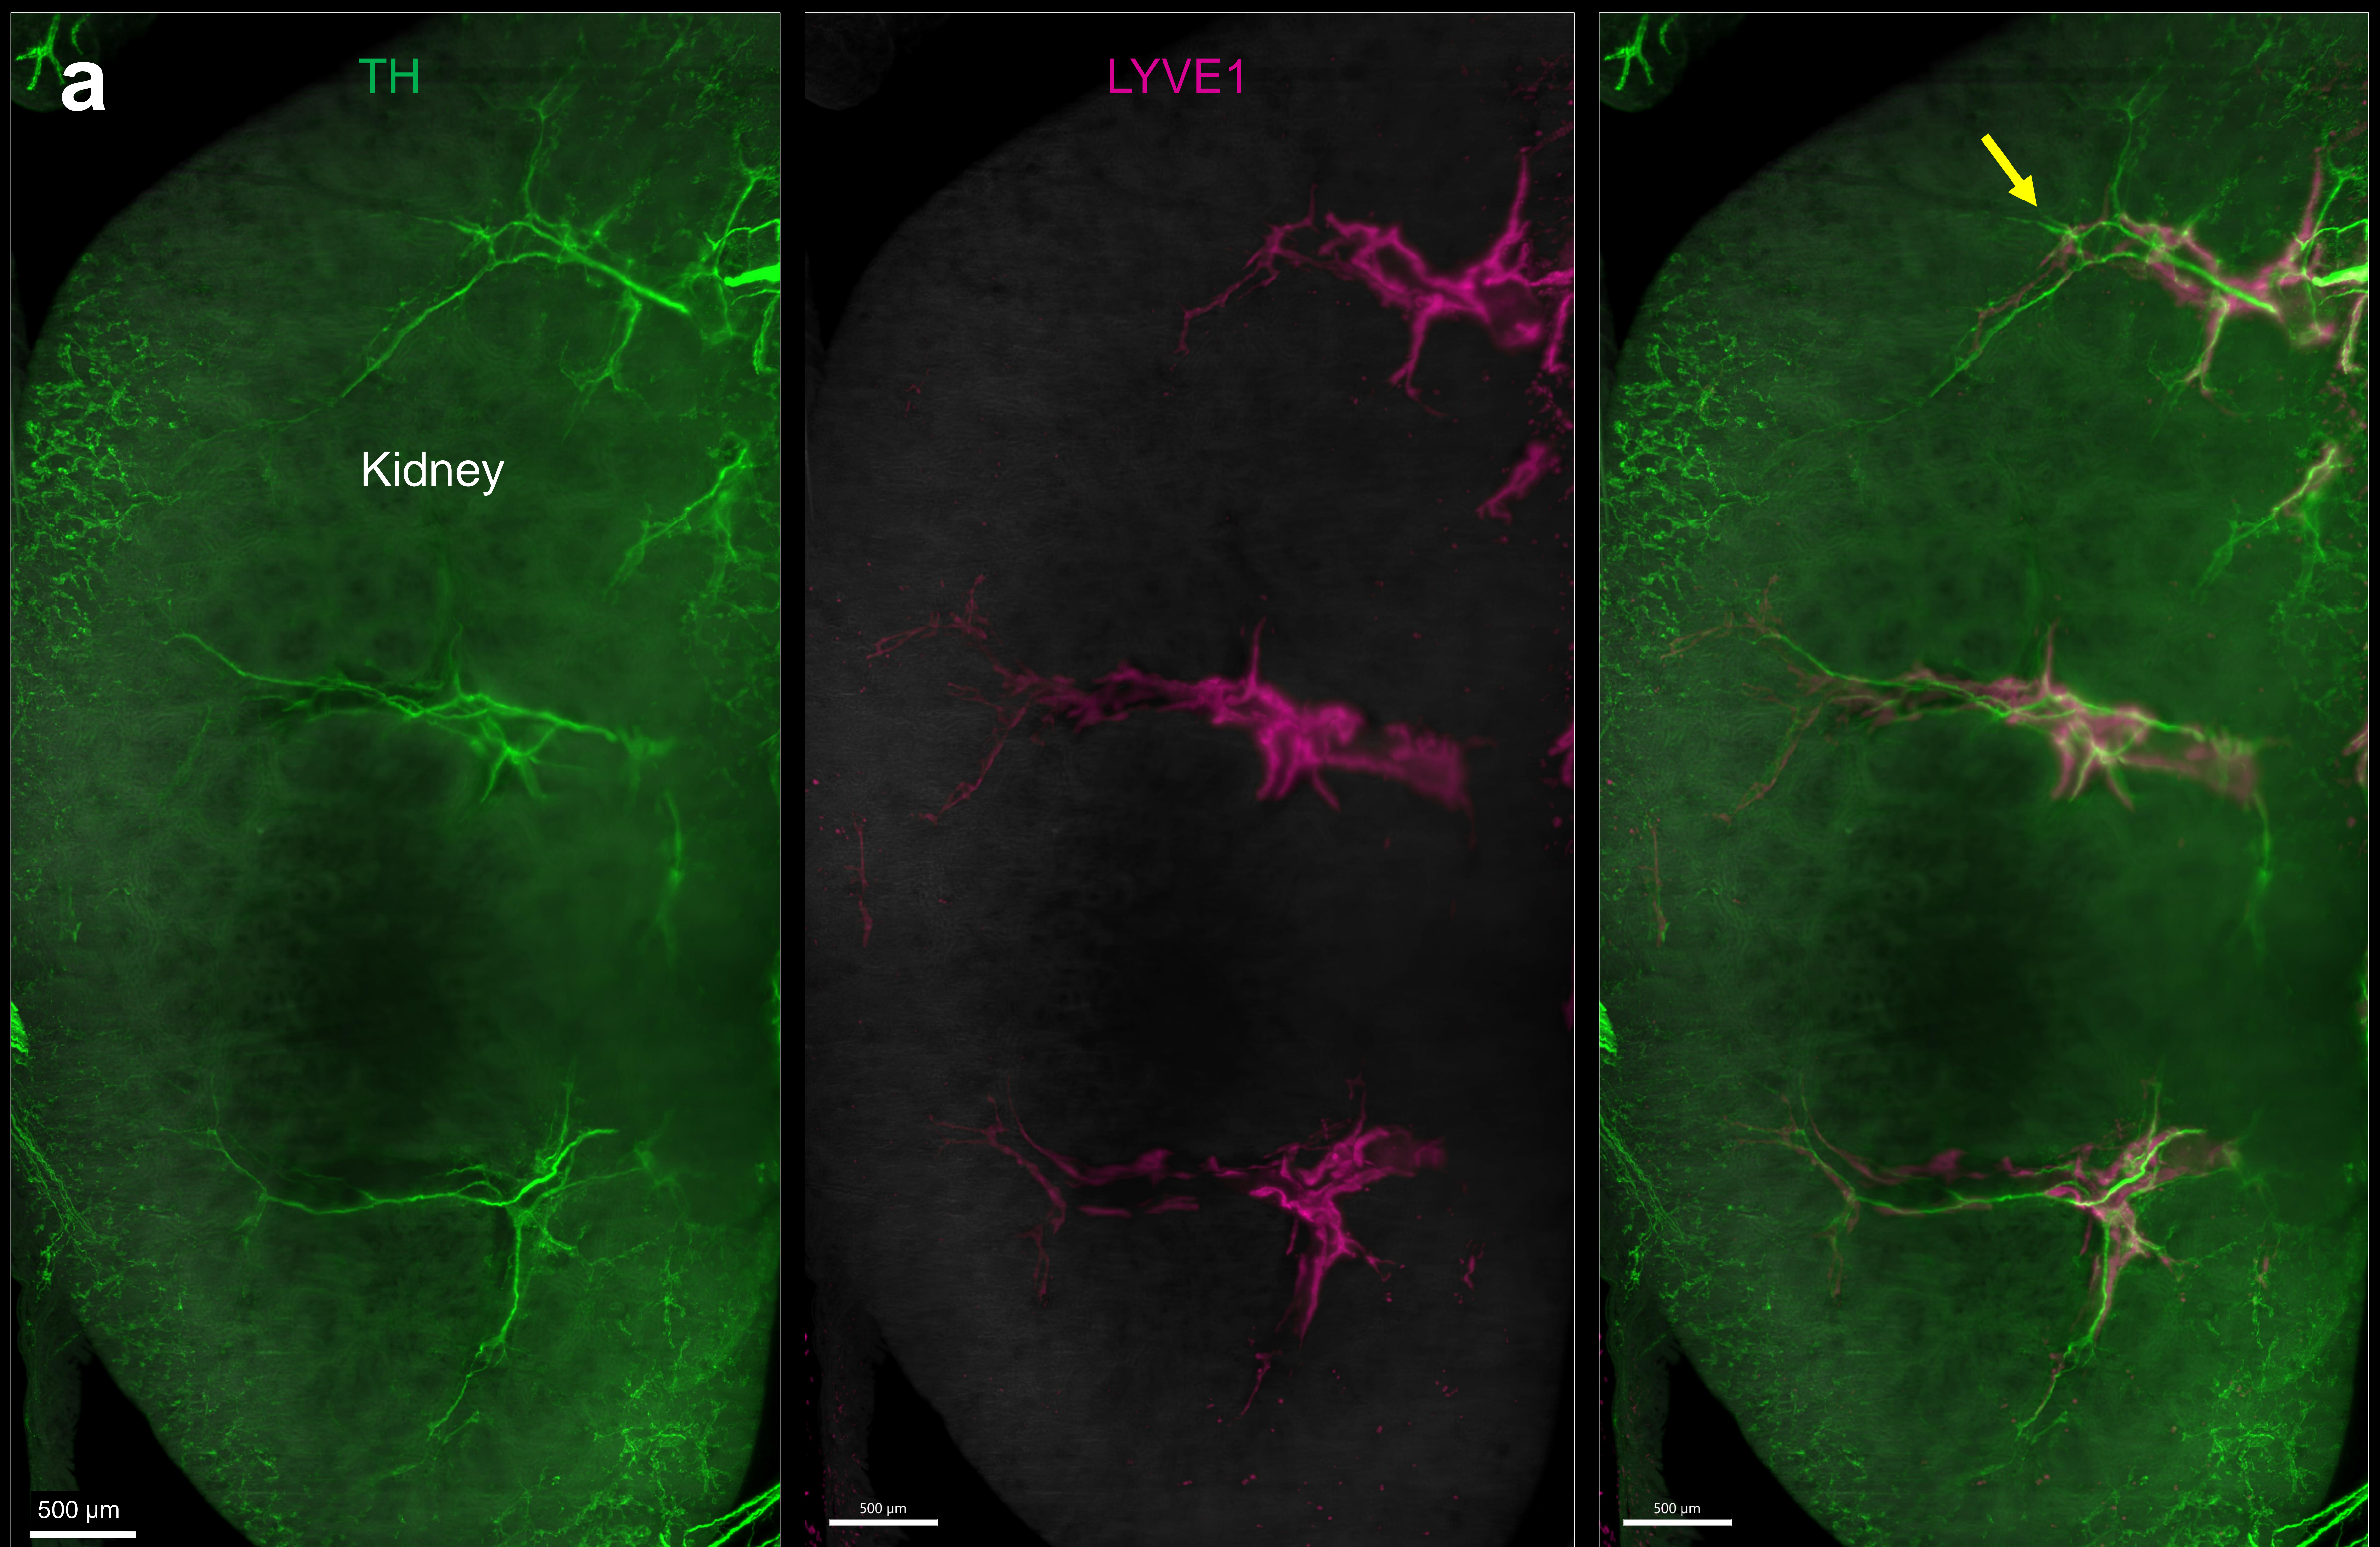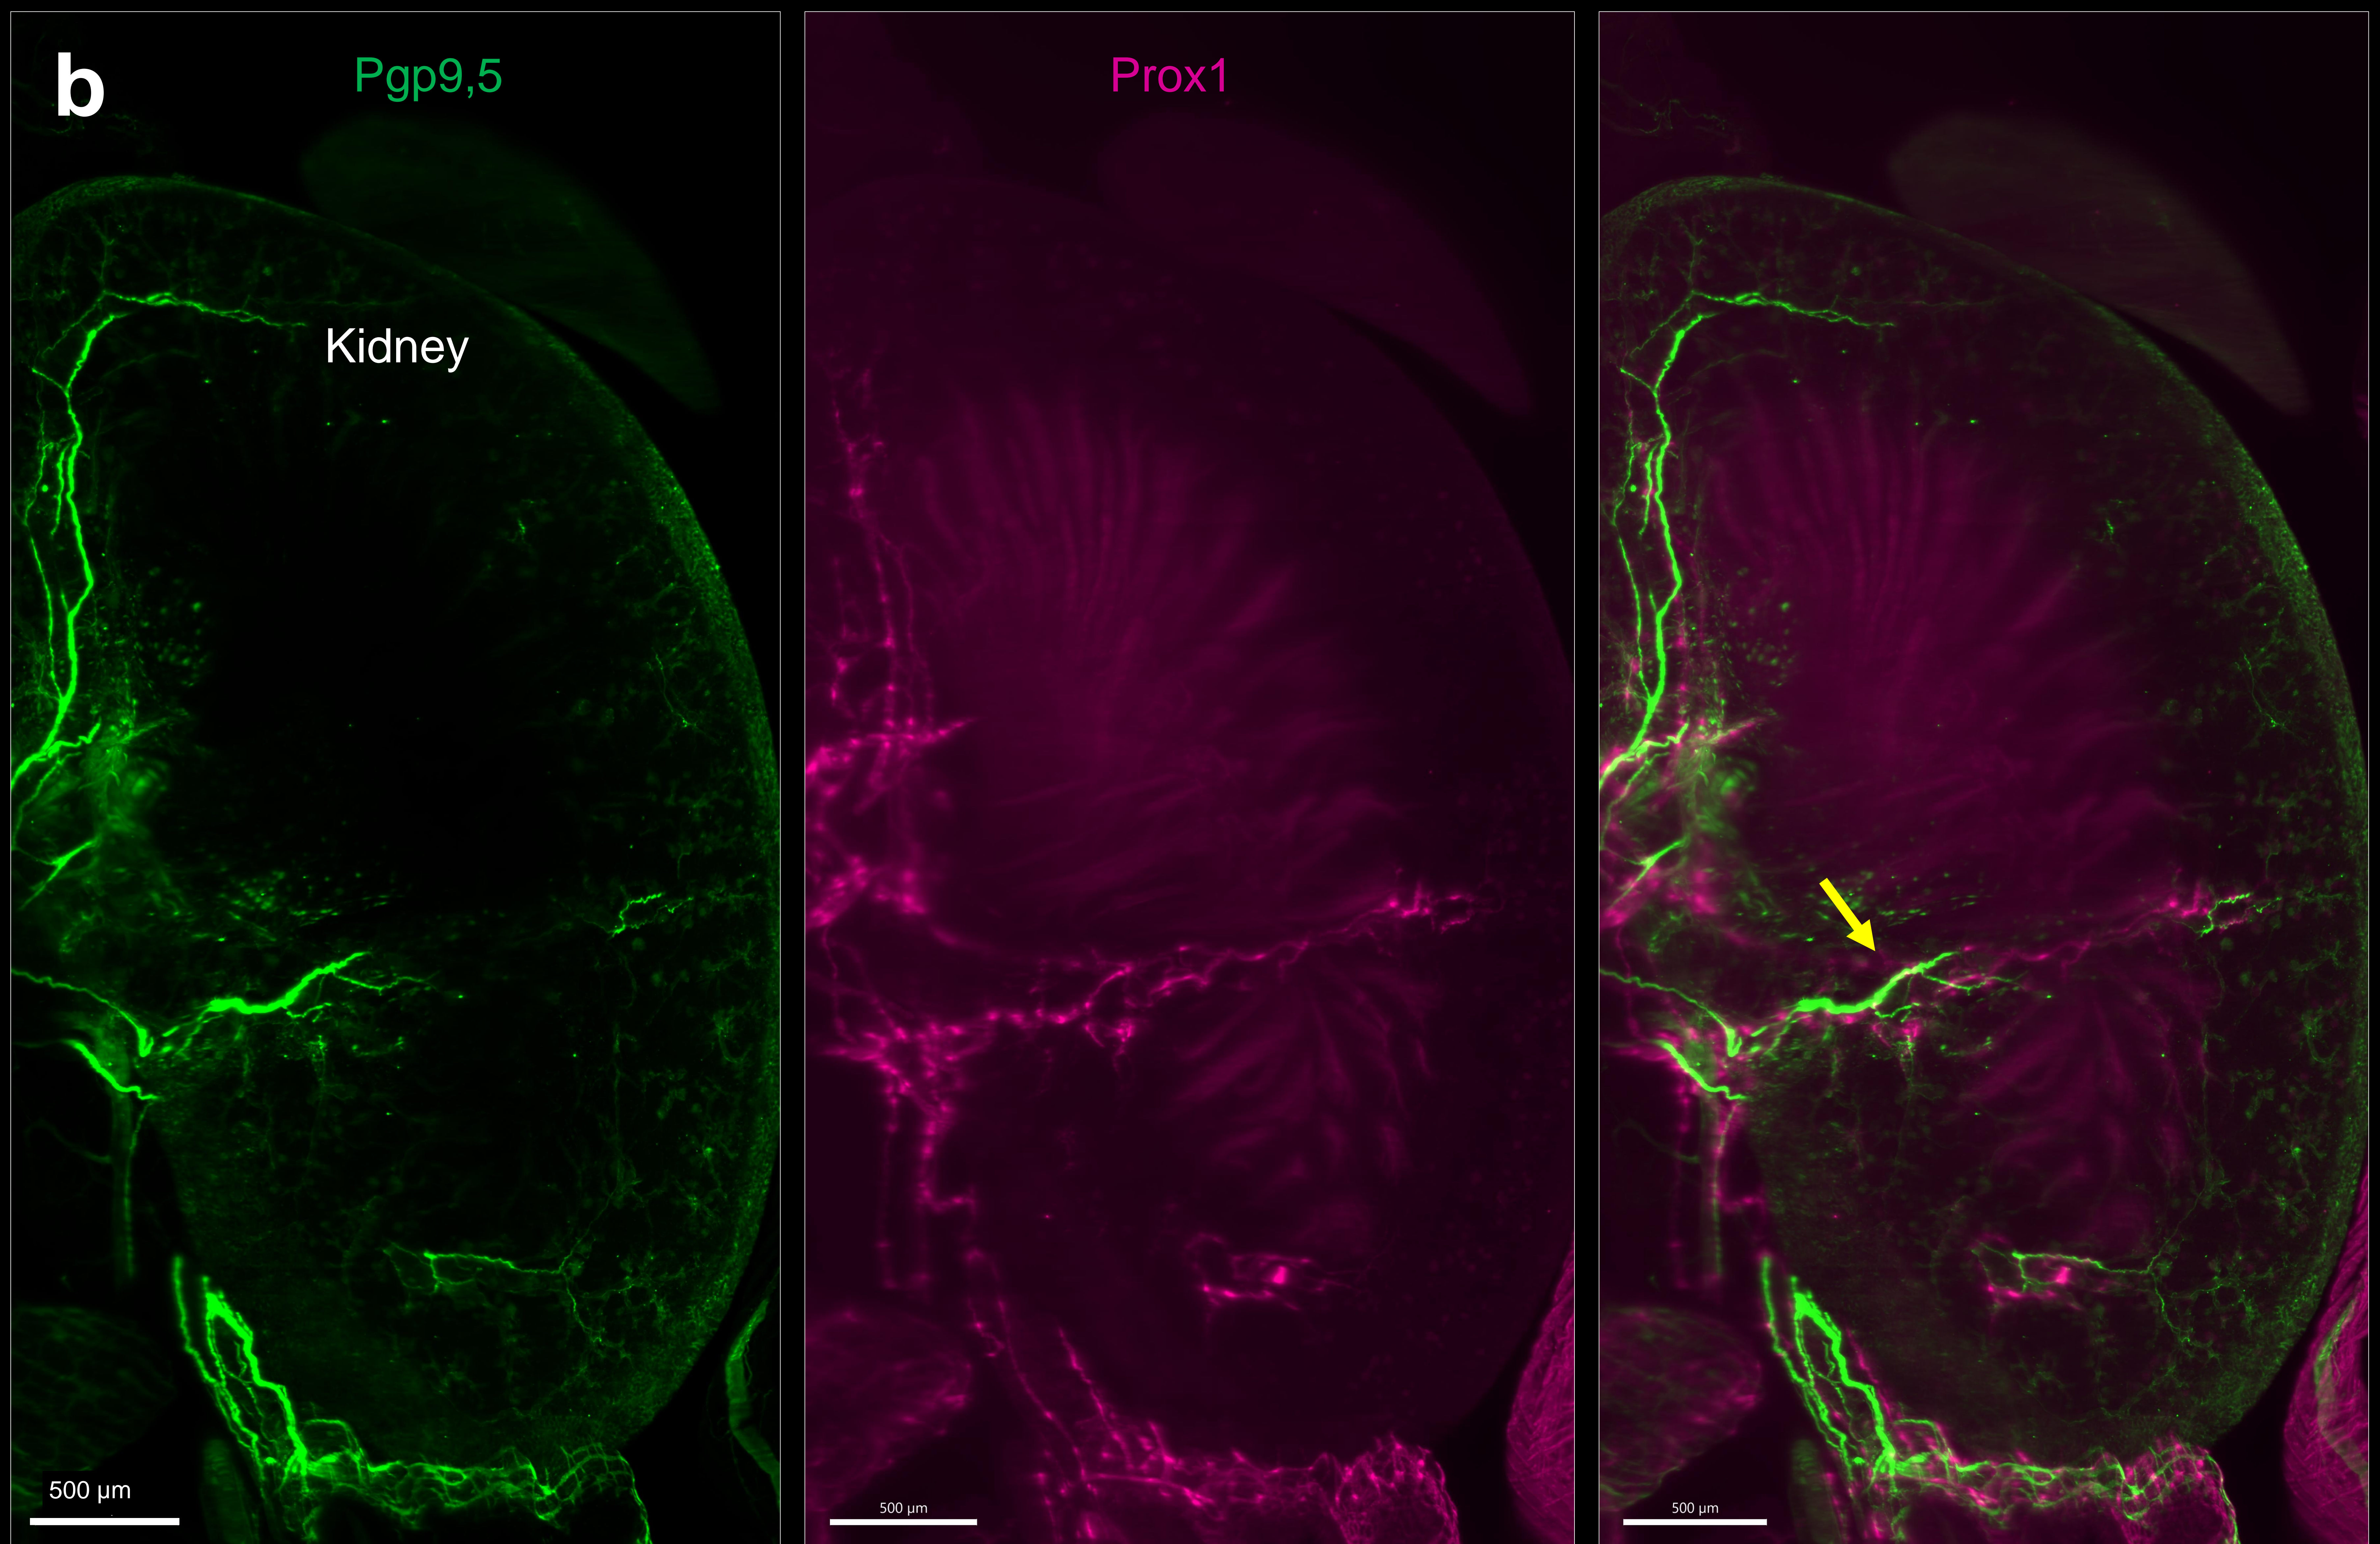

### Supplementary Figure 11

#### Nerve-lymphatic vessel interactions in the kidney

(a) The TH sympathetic neuron (green) innervates the LYVE1 lymphatic vessel (magenta) in the kidney.  
 (b) The PGP 9.5 pan-neuronal marker (green) is combined with the Prox1 lymphatic vessel marker (magenta). n=3.



## **Video captions**

### **Supplementary Video 1**

3D reconstruction of a mouse labeled with PGP 9.5 and imaged with light-sheet microscopy. Different PGP 9.5 innervation regions (green) are visualized with high contrast over background (gray).

### **Supplementary Video 2**

3D view of PGP 9.5 positive peripheral nerve in mouse heart showing in magenta.

### **Supplementary Video 3**

3D visualization of nerves in mouse spleen labeled with PGP9.5 in magenta.

### **Supplementary Video 4**

3D visualization of mouse liver and gallbladder innervated with PGP 9.5 positive peripheral nerves in magenta.

### **Supplementary Video 5**

3D annotation of neuronal connections in multiple organs (kidney, spleen, liver, and intestine) labeled with PGP 9.5 in green.

### **Supplementary Video 6**

3D annotation of mouse intestinal innervation with TH positive nerve in magenta. Grid-like lattice structures can be seen in the intestinal wall.

### **Supplementary Video 7**

Vagus nerve in magenta tracing at whole body.

### **Supplementary Video 8**

3D visualization of the entire lymphatic vessels in the whole mouse. The lymphatic vessels of a 4-week-old mouse were labeled with LYVE1 in yellow.



### **Supplementary Video 9**

3D visualization of the hindlimb of a mouse with LYVE1 lymphatic vessel labeling in yellow. Fine details of the lymphatic vessels and lymph nodes are shown.

### **Supplementary Video 10**

3D visualization of mouse kidney with LYVE1 lymphatic vessels labeled in yellow.

### **Supplementary Video 11**

3D annotation of mouse stomach with LYVE1 lymphatic vessels highlighted in yellow.

The fine details of the lymphatic vessels are clearly visible throughout the scan.

### **Supplementary Video 12**

3D annotation of mouse intestine lymphatic vessels with yellow color labeled by LYVE1 and scanned with light-sheet microscopy. Fine details of the lymphatic vessels can be seen in the intestine and a lymph node is located adjacent to the intestine.

### **Supplementary Video 13**

view of the intestinal wall of a mouse with LYVE1 lymphatic vessels labeled in yellow.

### **Supplementary Video 14**

wildDISCO staining of Prox1 lymphatic vessels in green and arterial staining of alpha-SMA in red, revealing lymphatic vessels penetrated in mouse cerebral cortex.

### **Supplementary Video 15**

3D illustration showing wildDISCO staining of LYVE1 in yellow and podoplanin in magenta to visualize lymphatic capillaries covered on the surface of the mouse brain, and also entering the brain parenchyma around thalamus.

### **Supplementary Video 16**

3D view of LYVE1 labeled lymphatic vessels entering from brain to vertebrae.



### **Supplementary Video 17**

Intact mouse with skin labelled with LYVE1 lymphatic vessel.

### **Supplementary Video 18**

3D illustration showing innervation of intestinal lymph nodes by sympathetic neurons using TH staining to label sympathetic nerves in magenta and CD45 staining to label immune cells in green.

### **Supplementary Video 19**

Representative 3D reconstructions of immune cells on the intestine neurons. CD45 is stained in green for immune cell distribution and TH stained in magenta for sympathetic nerves.

### **Supplementary Video 20**

3D reconstruction of a TH and LYVE1 labeled mouse by light sheet microscopy.

Different regions of sympathetic nerve innervation in green and lymphatic vessels in blue can be seen.

### **Supplementary Video 21**

3D illustration of the TH-stained sympathetic nerve in green interacting with LYVE1-labeled lymphatic vessels in yellow on the intestinal wall.

### **Supplementary Video 22**

3D illustration of TH+ sympathetic nerve (green) interacting with LYVE1+ lymphatic vessels (yellow) inside the intestine.

### **Supplementary Video 23**

3D illustration showing the distribution of multiple lymph nodes throughout the mouse. Innervation of pan-neuron markers PGP 9.5 in green and lymph node masked color in cyan.



### **Supplementary Video 24**

Representative 3D illustration of a posterior limb lymph node innervated by PGP 9.5 positive nerves in green and Prox1 positive lymph nodes in magenta.

### **Supplementary Video 25**

TLS stained with CD3 and CD23 on 4T1 cancer metastasis model.

### **Supplementary Video 26**

Ki67<sup>+</sup> proliferating cells colocalized with PI in spinal cord.

### **Supplementary Video 27**

Ki67<sup>+</sup> proliferating cells colocalized with PI in vertebrae.

### **Supplementary Video 28**

Tutorial video for atlas website.

### **Supplementary Video 29**

Summary of results showing a homogeneous and simultaneous antibody staining throughout the entire mouse bodies.

### **Supplementary Video 30**

VR 3D visualization of neuronal connections in multiple organs labeled with PGP 9.5 in green and masked colors for kidney, spleen, liver, and intestine.

### **Supplementary Video 31**

VR 3D visualization of mouse intestinal innervation with TH positive nerve in magenta. Grid-like structures can be clearly visible throughout the intestinal wall.

### **Supplementary Table 1**

Validated antibodies over 30. In most case we use an antibody concentration of 0.1µg/ml. Each image of antibody staining is listed here <http://discotechnologies.org/wildDISCO/>



**Supplementary Table 1**

| <b>Validated Antibodies</b>           | <b>SOURCE</b>             | <b>IDENTIFIER</b> | <b>Price</b><br><b>Euro/mouse (20g)</b> |
|---------------------------------------|---------------------------|-------------------|-----------------------------------------|
| Rabbit Anti-Tyrosine hydroxylase (TH) | Millipore                 | Cat# AB152        | 424 euro/100ug<br>106 euro/mouse        |
| Rabbit Anti-Tyrosine hydroxylase (TH) | Abcam                     | Cat# ab6211       | 489 euro/100ug<br>122.25 euro/mouse     |
| Rabbit Anti-Tyrosine hydroxylase (TH) | Cell Signaling Technology | Cat# 2792         | 402 euro/100ug<br>100.5 euro/mouse      |
| Rabbit Anti-PGP 9.5                   | Proteintech               | Cat# 14730-1-AP   | 293 euro/150ug<br>48.8 euro/mouse       |
| Rabbit Anti-S100 beta                 | Abcam                     | Cat# ab52642      | 531 euro/100ug<br>132.75 euro/mouse     |
| FRabbit Anti-Neurofilament NF-M       | Covance                   | Cat# PRB-575C     | 185 euro/100ug<br>46.25 euro/mouse      |
| Rabbit Anti-Podoplanin                | Life Technologies         | Cat#MA529742      | 324 euro/100ug<br>81 euro/mouse         |
| Rabbit Anti-Peripherin                | Merck Millipore           | Cat#AB1530        | 350 euro/100ug<br>87.5 euro/mouse       |
| Rabbit Anti-Synapsin 1                | Cell Signaling            | Cat#5297S         | 339 euro/100ug<br>84.75 euro/mouse      |



|                                       |                 |                 |                                     |
|---------------------------------------|-----------------|-----------------|-------------------------------------|
| Rabbit Anti-Synapsin 2                | Cell Signaling  | Cat#85852S      | 332 euro/100ug<br>83 euro/mouse     |
| Alexa Fluor647 anti-Tubulin $\beta$ 3 | BioLegend       | Cat#801210      | 208 euro/100ug<br>52 euro/mouse     |
| Alexa Fluor647 anti-Tubulin $\beta$ 3 | Abcam           | Cat#ab190575    | 527 euro/100ug<br>131.75 euro/mouse |
| Rabbit Anti-Tubulin                   | GeneTex         | Cat# GTX00877   | 474 euro/100ug<br>118.5 euro/mouse  |
| Rabbit Anti- $\beta$ Tubulin          | Abcam           | Cat# ab179513   | 486euro/100ug<br>121.5 euro/mouse   |
| Mouse Anti-Podocalyxin                | R and D Systems | Cat# MAB1556    | 304 euro/100ug<br>76 euro/mouse     |
| Rabbit Anti-CD3                       | Abcam           | Cat# ab16669    | 365 euro/100ug<br>91.25 euro/mouse  |
| Rabbit Anti-CD3                       | Abcam           | Cat# ab5690     | 538 euro/100ug<br>134.5 euro/mouse  |
| Rat Anti-CD23                         | eBioscience     | Cat# 14-0232-81 | 50 euro/100ug<br>12.5 euro/mouse    |
| Rabbit Anti-CD23                      | Abcam           | Cat# ab302526   | 466 euro/100ug<br>116.5 euro/mouse  |
| Rabbit Anti-Ki67                      | Abcam           | Cat# ab15580    | 547 euro/100ug<br>136.75 euro/mouse |



|                                           |                          |                |                                     |
|-------------------------------------------|--------------------------|----------------|-------------------------------------|
| Rabbit Anti-Oct4                          | Abcam                    | Cat# ab19857   | 470 euro/100ug<br>117.5 euro/mouse  |
| Mouse Anti-Nestin                         | Santa Cruz               | Cat# sc-101541 | 286 euro/200ug<br>35.75 euro/mouse  |
| Rat Anti-Myelin Basic Protein MBP         | Sigma-Aldrich            | Cat# MAB386    | 363 euro/1mg<br>9.075 euro/mouse    |
| Rabbit Anti-Sox2                          | Cell Signaling           | Cat#2748       | 275 euro/100ug<br>68.75 euro/mouse  |
| Rabbit Anti-PAX7                          | Thermo Fisher Scientific | Cat# PA1-117   | 455 euro/100ug<br>113.75 euro/mouse |
| Rabbit Anti-LGR5                          | Abcam                    | Cat#ab219107   | 500 euro/100ug<br>125 euro/mouse    |
| Goat Anti-CGRP                            | Abcam                    | Cat#ab36001    | 501 euro/100ug<br>125.25 euro/mouse |
| Rabbit Anti-Alpha smooth muscle actin SMA | Abcam                    | Cat# ab5694    | 610 euro/100ug<br>152.5 euro/mouse  |
| Rabbit Anti-Collagen IV                   | Abcam                    | Cat# ab6586    | 480 euro/100ug<br>120 euro/mouse    |
| Rabbit Anti-Prox1                         | Millipore                | Cat# AB5475    | 372 euro/100ug<br>93 euro/mouse     |
| Rabbit Anti-Prox1                         | Abcam                    | Cat# ab101851  | 467 euro/100ug<br>116.75 euro/mouse |



|                                                    |                          |                 |                                     |
|----------------------------------------------------|--------------------------|-----------------|-------------------------------------|
| Rat Anti-LYVE1                                     | Thermo Fisher Scientific | Cat# 14-0443-82 | 193 euro/100ug<br>48.25 euro/mouse  |
| Rabbit Anti-Iba1                                   | FUJIFILM Wako shibayagi  | Cat# 019-19741  | 486 euro/50ug<br>243 euro/mouse     |
| Rat Anti-CD45                                      | BD Biosciences           | Cat# 14-0451-82 | 71 euro/100ug<br>17.75 euro/mouse   |
| Rabbit Anti-CD45                                   | Abcam                    | Cat# ab10558    | 480 euro/100ug<br>120 euro/mouse    |
| Rabbit Anti-GAP43                                  | Novus Biologicals        | Cat# NB300-143  | 349 euro/100ug<br>87.25 euro/mouse  |
| Rabbit Anti-CD68                                   | Abcam                    | Cat# ab125212   | 538 euro/100ug<br>134.5 euro/mouse  |
| Rabbit Anti-PBR peripheral benzodiazepine receptor | Abcam                    | Cat# ab109497   | 585 euro/100ug<br>146.25 euro/mouse |
| Rat Anti-CD4                                       | eBioscience              | Cat# 14-0041-82 | 67 euro/100ug<br>16.75 euro/mouse   |
| Rabbit Anti-CD8                                    | Thermo Fisher Scientific | Cat# PA5114996  | 430 euro/100ug<br>107.5 euro/mouse  |
| Alexa Fluor 647 Anti-GFP                           | Thermo Fisher Scientific | Cat# A31852     | 299 euro/100ug<br>74.75 euro/mouse  |
| Rat Anti-CD19                                      | Thermo Fisher Scientific | Cat# 16-0193-81 | 69 euro/50ug<br>34.5 euro/mouse     |



|                                                    |                          |              |                                      |
|----------------------------------------------------|--------------------------|--------------|--------------------------------------|
| Alexa Fluor Plus 647 goat anti-rabbit IgG antibody | Thermo Fisher Scientific | Cat# A32733  | 278 euro/1mg<br>6.95 euro/mouse      |
| Alexa Fluor 594 goat anti-rat IgG antibody         | Thermo Fisher Scientific | Cat# A-21245 | 191 euro/500ug<br>9.55 euro/mouse    |
| Alexa Fluor 647 goat anti-rat IgG antibody         | Thermo Fisher Scientific | Cat# A-21247 | 189.9 euro/500ug<br>9.495 euro/mouse |
| Alexa Fluor 568 goat anti-rabbit IgG antibody      | Thermo Fisher Scientific | Cat# A-11036 | 244 euro/500ug<br>12.2 euro/mouse    |
| Alexa Fluor 568 goat anti-rat IgG antibody         | Thermo Fisher Scientific | Cat# A-11077 | 208 euro/500ug<br>10.4 euro/mouse    |
